# Supplementary material for: Dinuclear zinc-catalyzed desymmetric intramolecular aldolization: an enantioselective construction of spiro[cyclohexanone-oxindole] derivatives
Source: Royal Society of Chemistry journal article supplement (doi:10.1039/c6ra02296k), 2016-01-01
Supplement: c6ra02296k1.pdf [file c6ra02296k1.pdf]

# **Dinuclear Zinc Catalyzed Desymmetric Intramolecular Aldolization: An Enantioselective Construction of Spiro[Cyclohexanone-Oxindole] Derivatives**

Ya-Fei Zhang, Shao-Jie Yin, Min Zhao, Jun-Qi, Zhang, Hai-Yan Li and Xing-Wang Wang\*

*Key Laboratory of Organic Synthesis of Jiangsu Province, College of Chemistry, Chemical Engineering and Materials Science, Soochow University, Suzhou 215123, P. R. China*

Fax: (+86)-512-6588-0378; e-mail: wangxw@suda.edu.cn

|                                                                                     |           |
|-------------------------------------------------------------------------------------|-----------|
| <b>1. General methods.....</b>                                                      | <b>2</b>  |
| <b>2. Typical experimental procedure.....</b>                                       | <b>3</b>  |
| <b>3. Experimental Data.....</b>                                                    | <b>5</b>  |
| <b>4. X-ray data of chiral 2a.....</b>                                              | <b>21</b> |
| <b>5. <sup>1</sup>H NMR, <sup>13</sup>C NMR and <sup>19</sup>F NMR spectra.....</b> | <b>24</b> |
| <b>6. HPLC spectra.....</b>                                                         | <b>64</b> |

## 1. General methods

Unless otherwise stated, all reagents were purchased from commercial suppliers and used without further purification. All solvents employed in the reactions were distilled from appropriate drying agent prior to use. Molecular Sieves were flame-dried under high vacuum before use. Substrates **1a-p** were prepared in air without any precautions to exclude moisture unless otherwise noted. The other reactions were carried out under nitrogen protection by the use of distilled solvents. Organic solutions were concentrated under reduced pressure on an EYELA N-1001 rotary evaporator. Reactions were monitored by thin-layer chromatography (TLC) on silica gel precoated glass plates ( $0.2 \pm 0.03$  mm thickness, GF-254, particle size 0.01–0.04 mm) from Yantai Chemical Industry Research Institute, P. R. China. Chromatograms were visualized by fluorescence quenching with UV light at 254 nm. Flash column chromatography was performed using silica gel (particle size 0.04 – 0.05 mm) from Yantai Chemical Industry Research Institute, P. R. China.  $^1\text{H}$ ,  $^{13}\text{C}$  NMR and  $^{31}\text{F}$  NMR spectra were recorded in  $\text{CDCl}_3$  on Varian Inova (400 MHz, 101 MHz and 162 MHz, respectively) spectrometer. Chemical shifts ( $\delta$  ppm) are relative to the resonance of the deuterated solvent as the internal standard ( $\text{CDCl}_3$ ,  $\delta$  7.26 ppm for proton NMR,  $\delta$  77.23 ppm for carbon NMR).  $^1\text{H}$  NMR data are reported as follows: chemical shift ( $\delta$ , ppm), multiplicity (s = singlet, d = doublet, t = triplet, q = quartet, m = multiplet, br. s = broad singlet, dd = double-doublet, td = triple-doublet, ddd = double-double-doublet), coupling constants (J) and assignment. Data for  $^{13}\text{C}$  NMR are reported in terms of coupling constants (J) and chemical shift ( $\delta$ , ppm). IR Spectra were recorded on Thermo Fisher Nicolet 6700. Melting points measured with melting point detector. High-resolution mass spectra were recorded on a commercial apparatus (ESI Source). High performance liquid chromatography (HPLC) was performed on an Agilent 1200 Series chromatographs using Daicel Chiralpak OJ-H or AD-H column (0.46cm x 25 cm). X-ray data were recorded on a Rigaku Mercury CCD/AFC diffractometer with Cu  $K\alpha$  radiation ( $\lambda=1.54178$  Å). Optical rotations are reported as follows:  $[\alpha]_{\text{D}}^{20}$  (c in g per 100 mL, solvent).

## 2. Typical experimental procedure

### 2.1 General procedure for the preparation of oxindolyl diketone derivatives 1a–p

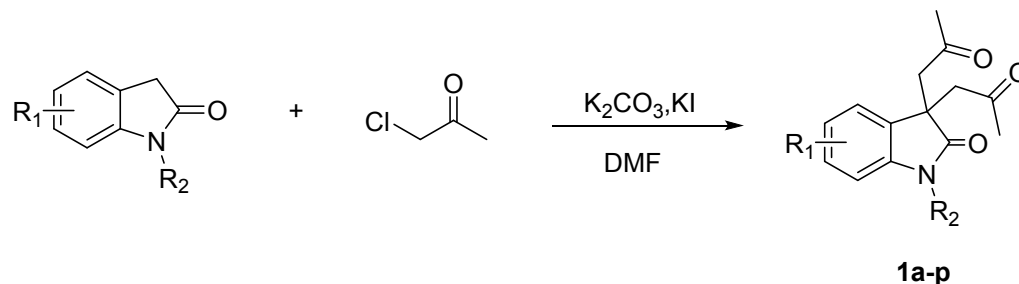

In an ordinary tube equipped with a magnetic stirring bar, the mixture of indolin-2-one (2.0 mmol), K<sub>2</sub>CO<sub>3</sub> (6.0 mmol) and KI (0.2 mmol) in DMF (5.0 mL) was stirred at room temperature for 10 minutes, and 1-chloropropan-2-one (6 mmol) was added. Then, the reaction was stirred for 12 hours at rt. After the reaction was completed, H<sub>2</sub>O (35 mL) was added. Afterwards, the mixture was extracted by CH<sub>2</sub>Cl<sub>2</sub> (3 × 10 mL). The combined organic layers were dried over anhydrous Na<sub>2</sub>SO<sub>4</sub> and concentrated *in vacuo*. The residue was purified by flash column chromatography on silica gel (eluent: petroleum ether/ethyl acetate = 2:1) to afford the desired products **1a–p**.

### 2.2 General procedure and spectroscopic data for dinuclear zinc catalyzed asymmetric intramolecular aldolization of oxindole dione derivatives:

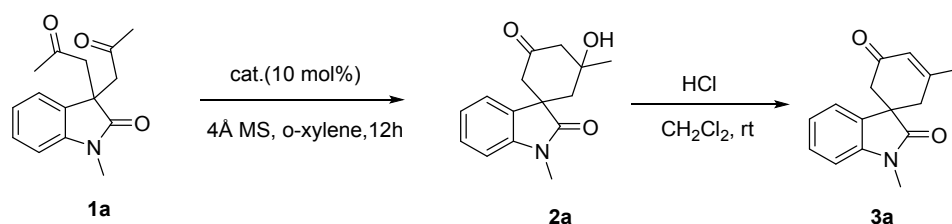

Under an argon atmosphere, a solution of diethylzinc (20 μL, 1.0 M in hexane, 0.02 mmol) was added to a stirred solution of **L9** (7.5 mg, 0.01 mmol) in o-xylene (1.0 mL) at room temperature. After the addition, the resulting solution was allowed to stir at rt for 30 min. Then **1a** (25 mg, 0.1 mmol) and 4 Å MS (30 mg) was added. The reaction was stirred for 12 h at 40 °C, then the reaction mixture was directly loaded onto a silica gel and purified by flash chromatography (eluent: petroleum ether/ethyl acetate = 2:1) to give desired products **2a**. Then **2a** was dissolved in CH<sub>2</sub>Cl<sub>2</sub> (1 mL) and HCl (1 mmol) was added and the solution was well stirred for 12 h at room temperature. After the

reaction was complete (monitored by TLC), 10% NaHCO<sub>3</sub> was added. The pH was adjusted to around 7.0. The mixture was extracted with CH<sub>2</sub>Cl<sub>2</sub> (3 × 5 mL). The organic layer was washed by H<sub>2</sub>O (5 mL) and dried over anhydrous Na<sub>2</sub>SO<sub>4</sub>. The solvent was evaporated *in vacuo* and the residue was purified by flash column chromatography on silica gel (eluent: petroleum ether/ethyl acetate = 2:1) to afford the desired product **3a**. The reaction procedures for the preparation of **2b-e** are identical with the above described for the preparation of **2a**.

The reaction procedures for the preparation of **3b-p**: Under an argon atmosphere, a solution of diethylzinc (20 μL, 1.0 M in hexane, 0.02 mmol) was added to a stirred solution of **L9** (7.5 mg, 0.01 mmol) in *o*-xylene (1.0 mL). After the addition, the resulting solution was allowed to stir at rt for 30 min. Then **1a** (25 mg, 0.1 mmol) and 4 Å MS (30 mg) was added. The reaction was stirred for 12 h at 40 °C, then HCl (1 mmol) was added and the solution was well stirred for another 12 h at rt. After the reaction was complete (monitored by TLC), 10% NaHCO<sub>3</sub> was added. The pH was adjusted to around 7.0. The mixture was extracted with CH<sub>2</sub>Cl<sub>2</sub> (3 × 5 mL). The organic layer was washed by H<sub>2</sub>O (5 mL) and dried over anhydrous Na<sub>2</sub>SO<sub>4</sub>. The solvent was evaporated *in vacuo* and the residue was purified by flash column chromatography on silica gel (eluent: petroleum ether/ethyl acetate = 2:1) to afford the desired product **3b-p**.

### 3. Experimental Data

#### 1,1'-(1-methyl-2-oxoindoline-3,3-diyl)bis(propan-2-one) (1a)

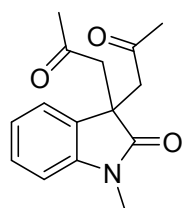

**1a**

The title compound was isolated by column chromatography (petroleum ether/ethyl acetate = 4:1) in 90% yield. White solid, mp 76 – 77 °C. <sup>1</sup>H NMR (400 MHz, CDCl<sub>3</sub>) δ 7.39 (d, *J* = 7.4 Hz, 1H), 7.31 (dd, *J* = 15.4, 1.0 Hz, 1H), 7.03 (t, *J* = 7.5 Hz, 1H), 6.91 (d, *J* = 7.8 Hz, 1H), 3.40 (d, *J* = 17.7 Hz, 2H), 3.32 (s, 3H), 2.88 (d, *J* = 17.7 Hz, 2H), 2.06 (s, 6H). <sup>13</sup>C NMR (101 MHz, CDCl<sub>3</sub>) δ 204.50, 178.78, 143.88, 130.47, 127.82, 123.34, 121.78, 107.72, 48.20, 46.55, 30.07, 26.04. ESI-MS: *m/z* calcd for [C<sub>15</sub>H<sub>17</sub>NO<sub>3</sub>, M + Na]<sup>+</sup> : 282.1101, found: 282.1111. IR ν (cm<sup>-1</sup>) 1704, 1610, 1470, 1426, 1168, 765.

#### 1,1'-(1,5-dimethyl-2-oxoindoline-3,3-diyl)bis(propan-2-one) (1b)

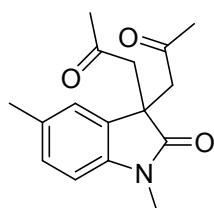

**1b**

The title compound was isolated by column chromatography (petroleum ether/ethyl acetate = 4:1) in 90% yield. White solid, mp 136 – 137 °C. <sup>1</sup>H NMR (400 MHz, CDCl<sub>3</sub>) δ 7.16 (s, 1H), 7.06 (dd, *J* = 7.9, 0.9 Hz, 1H), 6.75 (d, *J* = 7.9 Hz, 1H), 3.33 (d, *J* = 17.7 Hz, 2H), 3.25 (s, 3H), 2.82 (d, *J* = 17.7 Hz, 2H), 2.29 (s, 3H), 2.01 (s, 6H). <sup>13</sup>C NMR (101 MHz, CDCl<sub>3</sub>) δ 204.59, 178.70, 141.48, 131.24, 130.53, 128.07, 124.25, 107.41, 48.24, 46.61, 30.06, 26.06, 20.69. ESI-MS: *m/z* calcd for [C<sub>16</sub>H<sub>19</sub>NO<sub>3</sub>, M + Na]<sup>+</sup> : 296.1257, found: 296.1262. IR ν (cm<sup>-1</sup>) 1712, 1501, 1403, 1167, 805, 622.

#### 1,1'-(5-methoxy-1-methyl-2-oxoindoline-3,3-diyl)bis(propan-2-one) (1c)

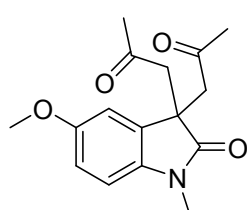

**1c**

The title compound was isolated by column chromatography (petroleum ether/ethyl acetate = 4:1) in 88% yield. Light yellow solid, mp 100 – 101 °C. <sup>1</sup>H NMR (400 MHz, CDCl<sub>3</sub>) δ 7.01 (d, *J* = 1.8 Hz, 1H), 6.76 (t, *J* = 5.8 Hz, 2H), 3.75 (s, 3H), 3.33 (d, *J* = 17.8 Hz, 2H), 3.24 (s, 3H), 2.82 (d, *J* = 17.8 Hz, 2H), 2.02 (s, 6H). <sup>13</sup>C NMR (101 MHz, CDCl<sub>3</sub>) δ 204.42, 178.36, 155.18, 137.44, 131.89, 111.63, 111.29, 107.84, 55.20, 48.16, 46.91, 30.02, 26.10. ESI-MS: *m/z* calcd for [C<sub>16</sub>H<sub>19</sub>NO<sub>4</sub>, M +

$\text{Na}]^+$  : 312.1206, found: 312.1212. IR  $\nu$  ( $\text{cm}^{-1}$ ) 1704, 1498, 1346, 1261, 1112, 805, 629.

### 1,1'-(1,5,7-trimethyl-2-oxindoline-3,3-diyl)bis(propan-2-one) (1d)

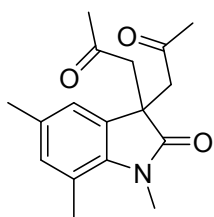

**1d**

The title compound was isolated by column chromatography (petroleum ether/ethyl acetate = 4:1) in 85% yield. Light yellow solid, mp 109 – 110 °C.  $^1\text{H}$  NMR (400 MHz,  $\text{CDCl}_3$ )  $\delta$  6.95 (s, 1H), 6.79 (s, 1H), 3.52 (s, 3H), 3.26 (d,  $J = 17.5$  Hz, 2H), 2.83 (d,  $J = 17.5$  Hz, 2H), 2.54 (s, 3H), 2.23 (s, 3H), 2.00 (s, 6H).  $^{13}\text{C}$  NMR (101 MHz,  $\text{CDCl}_3$ )  $\delta$  204.62, 179.41, 139.17, 132.11, 131.18, 131.04, 121.61, 118.92, 48.60, 46.11, 30.17, 29.45, 20.35, 18.50. ESI-MS:  $m/z$  calcd for  $[\text{C}_{17}\text{H}_{21}\text{NO}_3, \text{M} + \text{Na}]^+$  : 310.1414, found: 310.1421. IR  $\nu$  ( $\text{cm}^{-1}$ ) 1709, 1601, 1475, 1373, 1167, 1101, 858, 643.

### 1,1'-(5-fluoro-1-methyl-2-oxindoline-3,3-diyl)bis(propan-2-one) (1e)

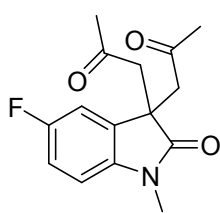

**1e**

The title compound was isolated by column chromatography (petroleum ether/ethyl acetate = 4:1) in 80% yield. White solid, mp 156 – 157 °C.  $^1\text{H}$  NMR (400 MHz,  $\text{CDCl}_3$ )  $\delta$  7.16 (dd,  $J = 8.3, 2.6$  Hz, 1H), 6.95 (td,  $J = 8.9, 2.6$  Hz, 1H), 6.77 (dd,  $J = 8.5, 4.2$  Hz, 1H), 3.37 (d,  $J = 18.0$  Hz, 2H), 3.25 (s, 3H), 2.82 (d,  $J = 18.0$  Hz, 2H), 2.03 (s, 6H).  $^{13}\text{C}$  NMR (101 MHz,  $\text{CDCl}_3$ )  $\delta$  204.26, 178.49, 158.47 (d,  $J = 240.5$  Hz), 139.93 (d,  $J = 1.8$  Hz), 132.15 (d,  $J = 8.3$  Hz), 113.75 (d,  $J = 23.3$  Hz), 111.97 (d,  $J = 25.2$  Hz), 107.96 (d,  $J = 8.2$  Hz), 48.05, 46.83 (d,  $J = 1.7$  Hz), 29.87, 26.15.  $^{19}\text{F}$  NMR (376 MHz,  $\text{CDCl}_3$ )  $\delta$  -120.89. ESI-MS:  $m/z$  calcd for  $[\text{C}_{15}\text{H}_{16}\text{FNO}_3, \text{M} + \text{Na}]^+$  : 300.1006, found: 300.1011. IR  $\nu$  ( $\text{cm}^{-1}$ ) 1706, 1620, 1495, 1389, 1170, 1109, 824, 627.

### 1,1'-(5-chloro-1-methyl-2-oxindoline-3,3-diyl)bis(propan-2-one) (1f)

The title compound was isolated by column chromatography (petroleum ether/ethyl acetate = 4:1) in 85% yield. White solid, mp 100 – 101 °C.  $^1\text{H}$  NMR (400 MHz,  $\text{CDCl}_3$ )  $\delta$  7.36 (d,  $J = 2.0$  Hz, 1H), 7.23 (dd,  $J = 8.3, 2.1$  Hz, 1H), 6.78 (d,  $J = 8.3$  Hz, 1H), 3.36 (d,  $J = 18.1$  Hz, 2H), 3.25 (s, 3H), 2.82 (d,  $J = 18.1$  Hz, 2H), 2.04 (s, 6H).  $^{13}\text{C}$  NMR (101 MHz,

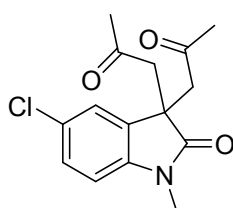

**1f**

CDCl<sub>3</sub>)  $\delta$  204.20, 178.42, 142.63, 132.28, 127.67, 124.05, 108.52, 99.50, 48.14, 46.57, 29.86, 26.15. ESI-MS:  $m/z$  calcd for [C<sub>15</sub>H<sub>16</sub>ClNO<sub>3</sub>, M + Na]<sup>+</sup> : 316.0711, found: 316.0722. IR  $\nu$  (cm<sup>-1</sup>) 1706, 1610, 1493, 1343, 1167, 1104, 826, 620.

### 1,1'-(5-bromo-1-methyl-2-oxoindoline-3,3-diyl)bis(propan-2-one) (1g)

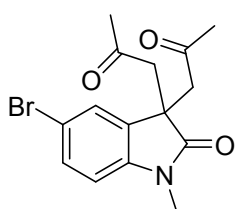

**1g**

The title compound was isolated by column chromatography (petroleum ether/ethyl acetate = 4:1) in 87% yield. White solid, mp 158 – 159 °C. <sup>1</sup>H NMR (400 MHz, CDCl<sub>3</sub>)  $\delta$  7.49 (d,  $J$  = 1.8 Hz, 1H), 7.38 (dd,  $J$  = 8.3, 1.9 Hz, 1H), 6.74 (d,  $J$  = 8.3 Hz, 1H), 3.35 (d,  $J$  = 18.1 Hz, 2H), 3.24 (s, 3H), 2.82 (d,  $J$  = 18.1 Hz, 2H), 2.04 (s, 6H). <sup>13</sup>C NMR (101 MHz, CDCl<sub>3</sub>)  $\delta$  204.18, 178.32, 143.13, 132.68, 130.60, 126.71, 114.44, 109.06, 48.17, 46.51, 29.86, 26.13. ESI-MS:  $m/z$  calcd for [C<sub>15</sub>H<sub>16</sub>BrNO<sub>3</sub>, M + Na]<sup>+</sup> : 360.0206, found: 360.0213. IR  $\nu$  (cm<sup>-1</sup>) 1706, 1607, 1491, 1352, 1166, 1105, 823, 617.

### 1,1'-(4-chloro-1-methyl-2-oxoindoline-3,3-diyl)bis(propan-2-one) (1h)

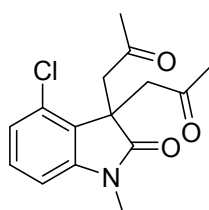

**1h**

The title compound was isolated by column chromatography (petroleum ether/ethyl acetate = 4:1) in 85% yield. White solid, mp 99 – 100 °C. <sup>1</sup>H NMR (400 MHz, CDCl<sub>3</sub>)  $\delta$  7.20 (t,  $J$  = 8.0 Hz, 1H), 6.89 (d,  $J$  = 8.2 Hz, 1H), 6.77 (d,  $J$  = 7.8 Hz, 1H), 3.49 (d,  $J$  = 16.8 Hz, 2H), 3.28 (s, 3H), 2.98 (d,  $J$  = 16.9 Hz, 2H), 1.97 (s, 6H). <sup>13</sup>C NMR (101 MHz, CDCl<sub>3</sub>)  $\delta$  203.47, 177.36, 146.81, 129.24, 128.38, 125.93, 122.26, 106.31, 47.28, 47.21, 29.78, 26.28. ESI-MS:  $m/z$  calcd for [C<sub>15</sub>H<sub>16</sub>ClNO<sub>3</sub>, M + Na]<sup>+</sup> : 316.0711, found: 316.0721. IR  $\nu$  (cm<sup>-1</sup>) 1708, 1605, 1457, 1300, 1206, 1100, 793, 625.

### 1,1'-(4-bromo-1-methyl-2-oxoindoline-3,3-diyl)bis(propan-2-one) (1i)

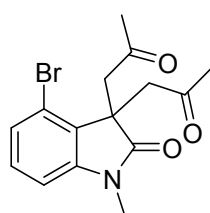

**1i**

The title compound was isolated by column chromatography (petroleum ether/ethyl acetate = 4:1) in 82% yield. Light yellow solid, mp 101 – 102 °C. <sup>1</sup>H NMR (400 MHz, CDCl<sub>3</sub>)  $\delta$  7.12 (d,  $J$  = 7.9 Hz, 1H), 7.05 (dd,  $J$  = 8.2, 0.7 Hz, 1H), 6.81 (d,  $J$  = 7.7 Hz, 1H),

3.60 (d,  $J = 16.9$  Hz, 2H), 3.28 (s, 3H), 2.94 (d,  $J = 16.9$  Hz, 2H), 1.98 (s, 6H).  $^{13}\text{C}$  NMR (101 MHz,  $\text{CDCl}_3$ )  $\delta$  203.45, 177.39, 147.14, 129.49, 127.63, 125.33, 116.67, 106.80, 48.03, 47.07, 29.79, 26.21. ESI-MS:  $m/z$  calcd for  $[\text{C}_{15}\text{H}_{16}\text{BrNO}_3, \text{M} + \text{Na}]^+$  : 360.0206, found: 360.0212. IR  $\nu$  ( $\text{cm}^{-1}$ ) 1704, 1601, 1455, 1298, 1167, 790, 766.

### 1,1'-(6-bromo-1-methyl-2-oxoindoline-3,3-diyl)bis(propan-2-one) (1j)

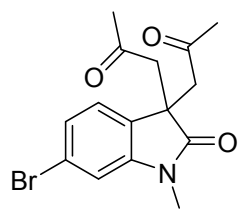

**1j**

The title compound was isolated by column chromatography (petroleum ether/ethyl acetate = 4:1) in 83% yield. White solid, mp 112 – 113 °C.  $^1\text{H}$  NMR (400 MHz,  $\text{CDCl}_3$ )  $\delta$  7.22 (d,  $J = 7.9$  Hz, 1H), 7.10 (dd,  $J = 7.9, 0.9$  Hz, 1H), 7.00 (d,  $J = 1.4$  Hz, 1H), 3.35 (d,  $J = 18.0$  Hz, 2H), 3.24 (s, 3H), 2.81 (d,  $J = 18.0$  Hz, 2H), 2.02 (s, 6H).  $^{13}\text{C}$  NMR (101 MHz,  $\text{CDCl}_3$ )  $\delta$  204.28, 178.66, 145.34, 129.48, 124.78, 124.47, 121.42, 111.21, 48.08, 46.20, 29.93, 26.14. ESI-MS:  $m/z$  calcd for  $[\text{C}_{15}\text{H}_{16}\text{BrNO}_3, \text{M} + \text{Na}]^+$  : 360.0206, found: 360.0213. IR  $\nu$  ( $\text{cm}^{-1}$ ) 1703, 1605, 1496, 1397, 1172, 1115, 819, 656.

### 1,1'-(6-chloro-1-methyl-2-oxoindoline-3,3-diyl)bis(propan-2-one) (1k)

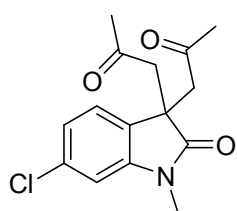

**1k**

The title compound was isolated by column chromatography (petroleum ether/ethyl acetate = 4:1) in 81% yield. Light yellow solid, mp 125 – 126 °C.  $^1\text{H}$  NMR (400 MHz,  $\text{CDCl}_3$ )  $\delta$  7.28 (d,  $J = 6.9$  Hz, 1H), 6.94 (dd,  $J = 7.9, 1.6$  Hz, 1H), 6.85 (d,  $J = 1.7$  Hz, 1H), 3.35 (d,  $J = 18.0$  Hz, 2H), 3.25 (s, 3H), 2.81 (d,  $J = 18.0$  Hz, 2H), 2.02 (s, 6H).  $^{13}\text{C}$  NMR (101 MHz,  $\text{CDCl}_3$ )  $\delta$  204.30, 178.80, 145.20, 133.59, 128.91, 124.39, 121.52, 108.46, 48.14, 46.15, 29.93, 26.14. ESI-MS:  $m/z$  calcd for  $[\text{C}_{15}\text{H}_{16}\text{ClNO}_3, \text{M} + \text{Na}]^+$  : 316.0711, found: 316.0721. IR  $\nu$  ( $\text{cm}^{-1}$ ) 1703, 1609, 1498, 1365, 1172, 878, 819, 785.

### 1,1'-(7-chloro-1-methyl-2-oxoindoline-3,3-diyl)bis(propan-2-one) (1l)

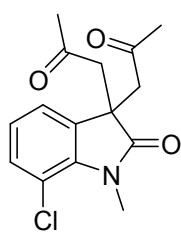

**1l**

The title compound was isolated by column chromatography (petroleum ether/ethyl acetate = 4:1) in 85% yield. White solid, mp



130 – 131 °C. <sup>1</sup>H NMR (400 MHz, CDCl<sub>3</sub>) δ 7.22 (dd, *J* = 7.4, 0.9 Hz, 1H), 7.17 (dd, *J* = 8.2, 0.9 Hz, 1H), 6.87 (dd, *J* = 8.1, 7.5 Hz, 1H), 3.64 (s, 3H), 3.33 (d, *J* = 17.8 Hz, 2H), 2.85 (d, *J* = 17.8 Hz, 2H), 2.02 (s, 6H). <sup>13</sup>C NMR (101 MHz, CDCl<sub>3</sub>) δ 204.20, 179.13, 139.86, 133.39, 130.14, 122.46, 121.59, 115.18, 48.41, 46.27, 29.99, 29.49. ESI–MS: *m/z* calcd for [C<sub>15</sub>H<sub>16</sub>ClNO<sub>3</sub>, M + Na]<sup>+</sup> : 316.0711, found: 316.0715. IR ν (cm<sup>-1</sup>) 1711, 1606, 1468, 1337, 1167, 1063, 761.

### 1,1'-(7-fluoro-1-methyl-2-oxoindoline-3,3-diyl)bis(propan-2-one) (1m)

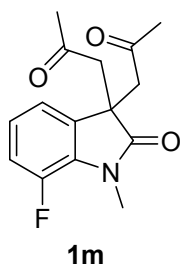

The title compound was isolated by column chromatography (petroleum ether/ethyl acetate = 4:1) in 81% yield. Light yellow solid, mp 91 – 92 °C. <sup>1</sup>H NMR (400 MHz, CDCl<sub>3</sub>) δ 7.15 – 7.06 (m, 1H), 6.98 (dd, *J* = 11.0, 8.3 Hz, 1H), 6.93 – 6.84 (m, 1H), 3.48 (d, *J* = 2.7 Hz, 3H), 3.33 (d, *J* = 17.8 Hz, 2H), 2.85 (d, *J* = 17.8 Hz, 2H), 2.02 (s, 6H). <sup>13</sup>C NMR (101 MHz, CDCl<sub>3</sub>) δ 204.20, 178.44, 147.37 (d, *J* = 244.4 Hz), 133.46 (d, *J* = 3.4 Hz), 130.60 (d, *J* = 8.1 Hz), 122.18 (d, *J* = 6.4 Hz), 118.99 (d, *J* = 3.1 Hz), 115.82 (d, *J* = 19.2 Hz), 48.37, 46.72 (d, *J* = 2 Hz), 29.97, 28.51 (d, *J* = 5.9 Hz). <sup>19</sup>F NMR (376 MHz, CDCl<sub>3</sub>) δ -136.59. ESI–MS: *m/z* calcd for [C<sub>15</sub>H<sub>16</sub>FNO<sub>3</sub>, M + Na]<sup>+</sup> : 300.1006, found: 300.1002. IR ν (cm<sup>-1</sup>) 1704, 1629, 1483, 1355, 1297, 1116, 791, 735.

### 1,1'-(1,7-dimethyl-2-oxoindoline-3,3-diyl)bis(propan-2-one) (1n)

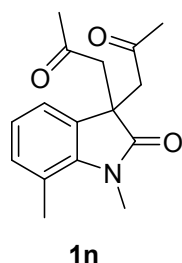

The title compound was isolated by column chromatography (petroleum ether/ethyl acetate = 4:1) in 92% yield. White solid, mp 125 – 126 °C. <sup>1</sup>H NMR (400 MHz, CDCl<sub>3</sub>) δ 7.14 (d, *J* = 7.2 Hz, 1H), 6.98 (d, *J* = 7.5 Hz, 1H), 6.85 (t, *J* = 7.5 Hz, 1H), 3.55 (s, 3H), 3.28 (d, *J* = 17.4 Hz, 2H), 2.84 (d, *J* = 17.4 Hz, 2H), 2.59 (s, 3H), 1.99 (s, 6H). <sup>13</sup>C NMR (101 MHz, CDCl<sub>3</sub>) δ 204.49, 179.46, 141.65, 131.61, 131.04, 121.64, 120.81, 119.28, 48.56, 46.01, 30.18, 29.48, 18.68. ESI–MS: *m/z* calcd for [C<sub>16</sub>H<sub>19</sub>NO<sub>3</sub>, M + Na]<sup>+</sup> : 296.1257, found: 296.1262. IR ν (cm<sup>-1</sup>) 1709, 1598, 1476, 1368, 1243, 1073, 744.

### 1,1'-(2-oxo-1-phenylindoline-3,3-diyl)bis(propan-2-one) (1o)

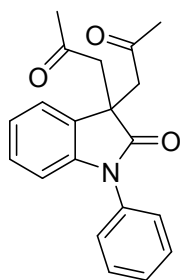

1o

The title compound was isolated by column chromatography (petroleum ether/ethyl acetate = 4:1) in 89% yield. White solid, mp 173 – 174 °C. <sup>1</sup>H NMR (400 MHz, CDCl<sub>3</sub>) δ 7.57 – 7.48 (m, 4H), 7.46 – 7.39 (m, 1H), 7.37 (dd, *J* = 7.5, 0.8 Hz, 1H), 7.17 (td, *J* = 7.8, 1.3 Hz, 1H), 7.00 (td, *J* = 7.6, 1.0 Hz, 1H), 6.77 (d, *J* = 7.8 Hz, 1H), 3.42 (d, *J* = 17.7 Hz, 2H), 2.98 (d, *J* = 17.7 Hz, 2H), 2.05 (d, *J* = 4.0 Hz, 6H). <sup>13</sup>C NMR (101 MHz, CDCl<sub>3</sub>) δ 204.33, 178.35, 144.36, 134.44, 130.13, 129.13, 127.73, 127.64, 126.51, 123.27, 122.10, 108.96, 48.87, 46.58, 30.03. ESI-MS: *m/z* calcd for [C<sub>20</sub>H<sub>19</sub>NO<sub>3</sub>, M + Na]<sup>+</sup> : 344.1257, found: 344.1268. IR ν (cm<sup>-1</sup>) 1702, 1594, 1481, 1404, 1180, 1167, 763, 643.

### 1,1'-(1-benzyl-2-oxoindoline-3,3-diyl)bis(propan-2-one) (1p)

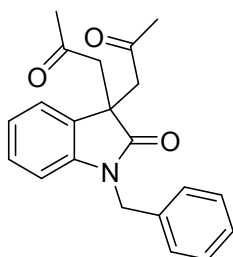

1p

The title compound was isolated by column chromatography (petroleum ether/ethyl acetate = 4:1) in 95% yield. White solid, mp 97 – 98 °C. <sup>1</sup>H NMR (400 MHz, CDCl<sub>3</sub>) δ 7.43 (d, *J* = 7.2 Hz, 2H), 7.37 – 7.25 (m, 4H), 7.11 (td, *J* = 7.7, 1.1 Hz, 1H), 6.94 (td, *J* = 7.6, 0.8 Hz, 1H), 6.69 (d, *J* = 7.8 Hz, 1H), 4.97 (s, 2H), 3.40 (d, *J* = 17.7 Hz, 2H), 2.88 (d, *J* = 17.7 Hz, 2H), 2.02 (s, 6H). <sup>13</sup>C NMR (101 MHz, CDCl<sub>3</sub>) δ 204.36, 178.85, 143.01, 135.59, 130.50, 128.25, 127.67, 126.98, 126.84, 123.35, 121.81, 108.87, 48.33, 46.65, 43.77, 30.10. ESI-MS: *m/z* calcd for [C<sub>21</sub>H<sub>21</sub>NO<sub>3</sub>, M + Na]<sup>+</sup> : 358.1414, found: 358.1435. IR ν (cm<sup>-1</sup>) 1701, 1609, 1464, 1404, 1361, 1167, 743, 643.

### (*R*)-1',3-dimethylspiro[cyclohexane-1,3'-indolin]-3-ene-2',5-dione (3a)

The title compound was isolated by column chromatography (petroleum ether/ethyl acetate = 2:1) in 68% yield. White solid, mp 109 – 110 °C, 93% *ee* [Daicel Chiralpak AD-H, hexanes/*i*-PrOH = 80/20, flow rate: 1.0 mL·min<sup>-1</sup>, λ = 254.4 nm, *t* (minor) =

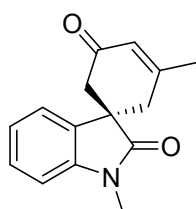

3a

6.939, *t* (major) = 8.564], [α]<sub>D</sub><sup>20</sup> = +78.8 (c 0.25, CHCl<sub>3</sub>). <sup>1</sup>H NMR (400 MHz, CDCl<sub>3</sub>) δ 7.30 (td, *J* = 7.8, 1.0 Hz, 1H), 7.24 (d, *J* = 7.4 Hz,

1H), 6.98 (td,  $J = 7.6, 0.7$  Hz, 1H), 6.88 (d,  $J = 7.8$  Hz, 1H), 6.17 (s, 1H), 3.25 (s, 3H), 3.01 (dd,  $J = 18.2, 1.0$  Hz, 1H), 2.91 (d,  $J = 16.2$  Hz, 1H), 2.27 (dd,  $J = 26.1, 17.3$  Hz, 2H), 2.01 (s, 3H).  $^{13}\text{C}$  NMR (101 MHz,  $\text{CDCl}_3$ )  $\delta$  195.78, 177.15, 158.39, 141.92, 132.37, 128.27, 126.19, 122.48, 122.45, 108.07, 48.52, 42.40, 37.67, 26.04, 24.00. ESI-MS:  $m/z$  calcd for  $[\text{C}_{15}\text{H}_{15}\text{NO}_2, \text{M} + \text{Na}]^+$  : 264.0995, found: 264.0991. IR  $\nu$  ( $\text{cm}^{-1}$ ) 3053, 2945, 2917, 2905, 1702, 1665, 1611, 1493, 1376, 758.

**(R)-1',3,5'-trimethylspiro[cyclohexane-1,3'-indolin]-3-ene-2',5-dione (3b)**

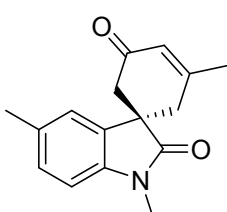

**3b**

The title compound was isolated by column chromatography (petroleum ether/ethyl acetate = 2:1) in 60% yield. White solid, mp 119 – 120 °C, 87% *ee* [Daicel Chiralpak AD-H, hexanes/*i*-PrOH = 80/20, flow rate: 1.0 mL·min<sup>-1</sup>,  $\lambda = 254.4$  nm,  $t$  (minor) = 6.200,  $t$  (major) = 7.720],  $[\alpha]_{\text{D}}^{20} = +196.92$  (c 0.26,  $\text{CHCl}_3$ ).  $^1\text{H}$  NMR (400 MHz,  $\text{CDCl}_3$ )  $\delta$  7.09 (d,  $J = 7.9$  Hz, 1H), 7.03 (s, 1H), 6.77 (d,  $J = 7.9$  Hz, 1H), 6.17 (s, 1H), 3.22 (s, 3H), 3.00 (dd,  $J = 18.3, 1.0$  Hz, 1H), 2.90 (d,  $J = 16.2$  Hz, 1H), 2.31 (s, 1H), 2.27 (s, 3H), 2.23 (d,  $J = 18.5$  Hz, 1H), 2.02 (s, 3H).  $^{13}\text{C}$  NMR (101 MHz,  $\text{CDCl}_3$ )  $\delta$  195.95, 177.10, 158.50, 139.52, 132.48, 132.09, 128.48, 126.16, 123.24, 107.81, 48.56, 42.42, 37.69, 26.05, 24.02, 20.64. ESI-MS:  $m/z$  calcd for  $[\text{C}_{16}\text{H}_{17}\text{NO}_2, \text{M} + \text{Na}]^+$  : 278.1151, found: 278.1148. IR  $\nu$  ( $\text{cm}^{-1}$ ) 3059, 2959, 2921, 2849, 1707, 1699, 1662, 1633, 1618, 1602, 1501, 1365, 1094, 824.

**(R)-5'-methoxy-1',3-dimethylspiro[cyclohexane-1,3'-indolin]-3-ene-2',5-dione (3c)**

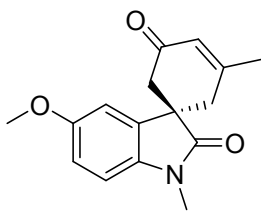

**3c**

The title compound was isolated by column chromatography (petroleum ether/ethyl acetate = 2:1) in 64% yield. Light yellow solid, mp 144 – 145 °C, 85% *ee* [Daicel Chiralpak AD-H, hexanes/*i*-PrOH = 80/20, flow rate: 1.0 mL·min<sup>-1</sup>,  $\lambda = 254.4$  nm,  $t$  (minor) = 8.098,  $t$  (major) = 9.290],  $[\alpha]_{\text{D}}^{20} = +365.71$  (c 0.18,  $\text{CHCl}_3$ ).  $^1\text{H}$  NMR (400 MHz,  $\text{CDCl}_3$ )  $\delta$  6.86-6.77 (m, 3H), 6.16 (s, 1H), 3.74 (s, 3H), 3.22 (s, 3H), 3.01 (d,  $J = 18.3$  Hz, 1H), 2.91 (d,  $J = 16.3$  Hz, 1H), 2.27 (dd,  $J = 28.3, 17.4$  Hz, 2H), 2.01 (s, 3H).  $^{13}\text{C}$  NMR (101 MHz,  $\text{CDCl}_3$ )  $\delta$  195.65, 176.79, 158.41, 155.60,

135.42, 133.69, 126.15, 111.81, 110.64, 108.28, 55.33, 48.86, 42.38, 37.57, 26.11, 24.01. ESI-MS:  $m/z$  calcd for  $[C_{16}H_{17}NO_3, M + Na]^+$  : 294.1101, found: 294.1097. IR  $\nu$  ( $cm^{-1}$ ) 3024, 2959, 2919, 2836, 1697, 1659, 1628, 1597, 1500, 1046, 809.

**(R)-1',3,5',7'-tetramethylspiro[cyclohexane-1,3'-indolin]-3-ene-2',5-dione (3d)**

The title compound was isolated by column chromatography (petroleum ether/ethyl

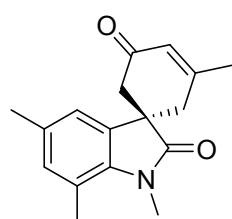

**3d**

acetate = 2:1) in 78% yield. White solid, mp 191 – 192 °C, 92% *ee*

[Daicel Chiralpak AD-H, hexanes/*i*-PrOH = 90/10, flow rate: 1.0

$mL \cdot min^{-1}$ ,  $\lambda = 254.4$  nm,  $t$  (minor) = 10.058,  $t$  (major) = 13.931],

$[\alpha]_D^{20} = +244.0$  (c 0.08,  $CHCl_3$ ).  $^1H$  NMR (400 MHz,  $CDCl_3$ )  $\delta$  6.85

(d,  $J = 18.0$  Hz, 2H), 6.15 (s, 1H), 3.49 (s, 3H), 2.96 (dd,  $J = 18.3$ ,

1.1 Hz, 1H), 2.87 (d,  $J = 16.3$  Hz, 1H), 2.54 (s, 3H), 2.31-2.25 (m, 2H), 2.21 (s, 3H),

2.00 (s, 3H).  $^{13}C$  NMR (101 MHz,  $CDCl_3$ )  $\delta$  196.09, 178.00, 158.38, 133.33, 132.42,

131.94, 126.10, 120.92, 119.39, 47.82, 42.63, 37.99, 29.41, 24.00, 20.31, 18.49. ESI-

MS:  $m/z$  calcd for  $[C_{17}H_{19}NO_2, M + Na]^+$  : 292.1308, found: 292.1300. IR  $\nu$  ( $cm^{-1}$ )

2959, 2919, 2850, 1698, 1666, 1601, 1477, 1348, 1085, 800.

**(R)-5'-fluoro-1',3-dimethylspiro[cyclohexane-1,3'-indolin]-3-ene-2',5-dione (3e)**

The title compound was isolated by column chromatography (petroleum ether/ethyl

acetate = 2:1) in 63% yield. Light yellow solid, mp 112 – 113 °C, 71% *ee* [Daicel

Chiralpak AD-H, hexanes/*i*-PrOH = 80/20, flow rate: 1.0  $mL \cdot min^{-1}$ ,

$\lambda = 254.4$  nm,  $t$  (minor) = 7.664,  $t$  (major) = 9.271],  $[\alpha]_D^{20} = +86.7$

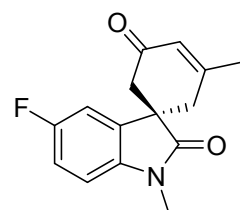

**3e**

(c 0.45,  $CHCl_3$ ).  $^1H$  NMR (400 MHz,  $CDCl_3$ )  $\delta$  7.06 – 6.95 (m,

2H), 6.80 (dd,  $J = 8.2, 4.1$  Hz, 1H), 6.18 (s, 1H), 3.23 (s, 3H), 3.03

(d,  $J = 19.3$  Hz, 1H), 2.92 (d,  $J = 16.3$  Hz, 1H), 2.31 (d,  $J = 6.5$

Hz, 1H), 2.25 – 2.18 (m, 1H), 2.03 (s, 3H).  $^{13}C$  NMR (101 MHz,

$CDCl_3$ )  $\delta$  195.22, 176.79, 158.67 (d,  $J = 240.1$  Hz), 158.20, 137.90, 133.71 (d,  $J = 7.9$

Hz), 126.23, 114.48 (d,  $J = 23.3$  Hz), 110.89 (d,  $J = 25.1$  Hz), 108.56 (d,  $J = 8.2$  Hz),

48.89, 42.23, 37.42, 26.18, 24.00.  $^{19}F$  NMR (376 MHz,  $CDCl_3$ )  $\delta$  -119.46. ESI-MS:

m/z calcd for  $[C_{15}H_{14}FNO_2, M + Na]^+$  : 282.0901, found: 282.0911. IR  $\nu$  ( $cm^{-1}$ ) 3008, 2918, 2849, 1710, 1669, 1495, 1469, 1353, 752.

**(R)-5'-chloro-1',3-dimethylspiro[cyclohexane-1,3'-indolin]-3-ene-2',5-dione (3f)**

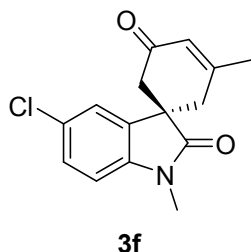

The title compound was isolated by column chromatography (petroleum ether/ethyl acetate = 2:1) in 70% yield. White solid, mp 108 – 109 °C, 80% *ee* [Daicel Chiralpak AD-H, hexanes/*i*-PrOH = 80/20, flow rate: 1.0 mL·min<sup>-1</sup>,  $\lambda$  = 254.4 nm, t (minor) = 7.771, t (major) = 9.414],  $[\alpha]_D^{20}$  = +262.5 (c 0.16, CHCl<sub>3</sub>). <sup>1</sup>H NMR (400 MHz, CDCl<sub>3</sub>)  $\delta$  7.28 (dd, *J* = 6.7, 1.5 Hz, 1H), 7.19 (d, *J* = 2.0 Hz, 1H), 6.81 (d, *J* = 8.3 Hz, 1H), 6.18 (s, 1H), 3.23 (s, 3H), 2.99 (d, *J* = 16.3 Hz, 1H), 2.90 (d, *J* = 16.3 Hz, 1H), 2.29 (d, *J* = 16.3 Hz, 1H), 2.23 (d, *J* = 18.4 Hz, 1H), 2.03 (s, 3H). <sup>13</sup>C NMR (101 MHz, CDCl<sub>3</sub>)  $\delta$  195.10, 176.67, 158.14, 140.54, 133.88, 128.27, 127.84, 126.27, 123.01, 109.00, 48.68, 42.16, 37.40, 26.17, 24.02. ESI-MS: m/z calcd for  $[C_{15}H_{14}ClNO_2, M + Na]^+$  : 298.0605, found: 298.0599. IR  $\nu$  ( $cm^{-1}$ ) 2955, 2921, 2851, 1711, 1662, 1609, 1492, 1284, 1101, 824.

**(R)-5'-bromo-1',3-dimethylspiro[cyclohexane-1,3'-indolin]-3-ene-2',5-dione (3g)**

The title compound was isolated by column chromatography (petroleum ether/ethyl acetate = 2:1) in 58% yield. White solid, mp 123 – 124 °C, 63% *ee* [Daicel Chiralpak AD-H, hexanes/*i*-PrOH = 80/20, flow rate: 1.0 mL·min<sup>-1</sup>,  $\lambda$  = 254.4 nm, t (minor) = 8.011, t (major) = 9.917],  $[\alpha]_D^{20}$  = +230.5 (c 0.20, CHCl<sub>3</sub>). <sup>1</sup>H NMR (400 MHz, CDCl<sub>3</sub>)  $\delta$  7.44 (dd, *J* = 8.3, 1.9 Hz, 1H), 7.32 (d, *J* = 1.9 Hz, 1H), 6.76 (d, *J* = 8.3 Hz, 1H), 6.19 (s, 1H), 3.23 (s, 3H), 3.00 (dd, *J* = 18.3, 1.0 Hz, 1H), 2.90 (d, *J* = 16.3 Hz, 1H), 2.30 (d, *J* = 16.5 Hz, 1H), 2.23 (d, *J* = 18.4 Hz, 1H), 2.04 (s, 3H). <sup>13</sup>C NMR (101 MHz, CDCl<sub>3</sub>)  $\delta$  195.12, 176.59, 158.21, 141.02, 134.26, 131.22, 126.26, 125.67, 115.17, 109.53, 48.63, 42.14, 37.39, 26.16, 24.05. ESI-MS: m/z calcd for  $[C_{15}H_{14}BrNO_2, M + Na]^+$  : 342.0100, found: 342.0101. IR  $\nu$  ( $cm^{-1}$ ) 2959, 2920, 2850, 1709, 1665, 1635, 1607, 1488, 1364, 1100, 806.

**(R)-4'-chloro-1',3-dimethylspiro[cyclohexane-1,3'-indolin]-3-ene-2',5-dione (3h)**

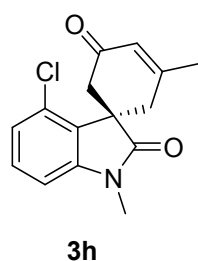

The title compound was isolated by column chromatography (petroleum ether/ethyl acetate = 2:1) in 45% yield. White solid, mp 55 – 56 °C, 82% *ee* [Daicel Chiralpak AD-H, hexanes/*i*-PrOH = 80/20, flow rate: 1.0 mL·min<sup>-1</sup>, λ = 254.4 nm, t (major) = 7.908, t (minor) = 8.472], [α]<sub>D</sub><sup>20</sup> = -53.2 (c 0.50, CHCl<sub>3</sub>). <sup>1</sup>H NMR (400 MHz, CDCl<sub>3</sub>) δ 7.31 – 7.26 (m, 1H), 7.04 (d, *J* = 8.2 Hz, 1H), 6.78 (d, *J* = 7.8 Hz, 1H), 6.12 (s, 1H), 3.37 (dd, *J* = 17.6, 9.9 Hz, 2H), 3.17 (s, 3H), 2.39 – 2.22 (m, 2H), 2.01 (s, 3H). <sup>13</sup>C NMR (101 MHz, CDCl<sub>3</sub>) δ 195.84, 177.43, 155.81, 144.34, 130.13, 129.65, 126.54, 125.89, 123.68, 106.56, 48.49, 38.48, 33.77, 25.92, 23.70. ESI-MS: *m/z* calcd for [C<sub>15</sub>H<sub>14</sub>ClNO<sub>2</sub>, M + Na]<sup>+</sup> : 298.0605, found: 298.0613. IR ν (cm<sup>-1</sup>) 3060, 2919, 2849, 1713, 1666, 1606, 1458, 1112, 775.

**(R)-4'-bromo-1',3-dimethylspiro[cyclohexane-1,3'-indolin]-3-ene-2',5-dione (3i)**

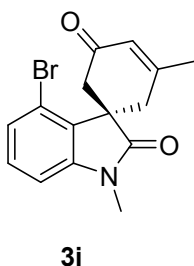

The title compound was isolated by column chromatography (petroleum ether/ethyl acetate = 2:1) in 53% yield. White solid, mp 92 – 93 °C, 88% *ee* [Daicel Chiralcel OJ-H, hexanes/*i*-PrOH = 90/10, flow rate: 1.0 mL·min<sup>-1</sup>, λ = 254.4 nm, t (minor) = 37.503, t (major) = 45.901], [α]<sub>D</sub><sup>20</sup> = -38.3 (c 0.18, CHCl<sub>3</sub>). <sup>1</sup>H NMR (400 MHz, CDCl<sub>3</sub>) δ 7.24 – 7.14 (m, 2H), 6.81 (dd, *J* = 7.0, 1.6 Hz, 1H), 6.12 (s, 1H), 3.54 (d, *J* = 16.6 Hz, 1H), 3.47 (dd, *J* = 18.8, 1.2 Hz, 1H), 3.16 (s, 3H), 2.30 (d, *J* = 16.6 Hz, 1H), 2.23 (d, *J* = 18.8 Hz, 1H), 2.00 (s, 3H). <sup>13</sup>C NMR (101 MHz, CDCl<sub>3</sub>) δ 195.78, 177.52, 155.57, 144.61, 129.85, 127.85, 126.83, 125.95, 118.50, 107.06, 49.08, 38.22, 33.56, 25.83, 23.72. ESI-MS: *m/z* calcd for [C<sub>15</sub>H<sub>14</sub>BrNO<sub>2</sub>, M + H]<sup>+</sup> : 320.0281, found: 320.0272. IR ν (cm<sup>-1</sup>) 2919, 2850, 1712, 1666, 1601, 1577, 1455, 1340, 1103, 773, 732.

**(R)-6'-bromo-1',3-dimethylspiro[cyclohexane-1,3'-indolin]-3-ene-2',5-dione (3j)**

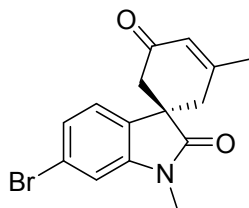

**3j**

The title compound was isolated by column chromatography (petroleum ether/ethyl acetate = 2:1) in 68 % yield. White solid, mp 124 – 125 °C, 73 % *ee* [Daicel Chiralpak AD-H, hexanes/*i*-PrOH = 80/20, flow rate: 1.0 mL·min<sup>-1</sup>, λ = 254.4 nm, t (minor) = 7.593, t (major) = 8.522], [α]<sub>D</sub><sup>20</sup> = +225.0 (c 0.30, CHCl<sub>3</sub>). <sup>1</sup>H NMR (400 MHz, CDCl<sub>3</sub>) δ 7.11 (dd, *J* = 8.0, 1.5 Hz, 1H), 7.08 (d, *J* = 7.9 Hz, 1H), 7.03 (d, *J* = 1.3 Hz, 1H), 6.16 (s, 1H), 3.22 (s, 3H), 3.00 (dd, *J* = 18.2, 1.1 Hz, 1H), 2.90 (d, *J* = 16.3 Hz, 1H), 2.28 (d, *J* = 16.2 Hz, 1H), 2.20 (d, *J* = 18.4 Hz, 1H), 2.01 (s, 3H). <sup>13</sup>C NMR (101 MHz, CDCl<sub>3</sub>) δ 195.27, 176.93, 158.13, 143.35, 131.17, 126.23, 125.19, 123.74, 121.95, 111.63, 48.33, 42.18, 37.52, 26.15, 23.99. ESI-MS: *m/z* calcd for [C<sub>15</sub>H<sub>14</sub>BrNO<sub>2</sub>, M + H]<sup>+</sup> : 320.0281, found: 320.0272. IR ν (cm<sup>-1</sup>) 3059, 2961, 2921, 2851, 1707, 1661, 1602, 1370, 1248, 1091, 805.

**(R)-6'-chloro-1',3-dimethylspiro[cyclohexane-1,3'-indolin]-3-ene-2',5-dione (3k)**

The title compound was isolated by column chromatography (petroleum ether/ethyl acetate = 2:1) in 55 % yield. Light yellow solid, mp 155 – 156 °C, 75 % *ee* [Daicel Chiralpak AD-H, hexanes/*i*-PrOH = 80/20, flow rate: 1.0 mL·min<sup>-1</sup>, λ = 254.4 nm, t (minor) = 7.337, t (major) = 8.232], [α]<sub>D</sub><sup>20</sup> = +300.6 (c 0.16, CHCl<sub>3</sub>). <sup>1</sup>H NMR (400 MHz, CDCl<sub>3</sub>) δ 7.14 (d, *J* = 8.0 Hz, 1H), 6.95 (dd, *J* = 8.0, 1.9 Hz, 1H), 6.88 (d, *J* = 1.8 Hz, 1H), 6.17 (s, 1H), 3.23 (s, 3H), 3.01 (dd, *J* = 18.2, 1.1 Hz, 1H), 2.90 (d, *J* = 16.2 Hz, 1H), 2.28 (d, *J* = 16.6 Hz, 1H), 2.20 (d, *J* = 18.4 Hz, 1H), 2.01 (s, 3H). <sup>13</sup>C NMR (101 MHz, CDCl<sub>3</sub>) δ 195.34, 177.08, 158.20, 143.22, 134.21, 130.61, 126.22, 123.38, 122.23, 108.86, 48.28, 42.26, 37.59, 26.15, 23.99. ESI-MS: *m/z* calcd for [C<sub>15</sub>H<sub>14</sub>ClNO<sub>2</sub>, M + Na]<sup>+</sup> : 298.0605, found: 298.0596. IR ν (cm<sup>-1</sup>) 3061, 2959, 2919, 2850, 1705, 1662, 1606, 1493, 1372, 1092, 799.

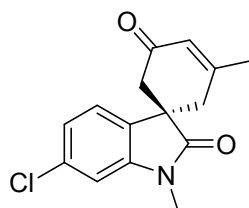

**3k**

**(R)-7'-chloro-1',3-dimethylspiro[cyclohexane-1,3'-indolin]-3-ene-2',5-dione (3l)**

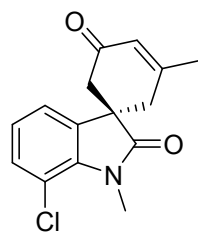

**3l**

The title compound was isolated by column chromatography (petroleum ether/ethyl acetate = 2:1) in 68 % yield. White solid, mp

92 – 93 °C, 75 % *ee* [Daicel Chiralpak AD-H, hexanes/*i*-PrOH = 80/20, flow rate: 1.0 mL·min<sup>-1</sup>, λ = 254.4 nm, t (minor) = 7.337, t (major) = 8.232], [α]<sub>D</sub><sup>20</sup> = +300.6 (c 0.16, CHCl<sub>3</sub>). <sup>1</sup>H NMR (400 MHz, CDCl<sub>3</sub>) δ 7.22 (dd, *J* = 8.2, 1.1 Hz, 1H), 7.14 (dd, *J* = 7.5, 1.1 Hz, 1H), 6.93 – 6.84 (m, 1H), 6.16 (s, 1H), 3.62 (s, 3H), 2.99 (dd, *J* = 18.3, 1.1 Hz, 1H), 2.89 (d, *J* = 16.3 Hz, 1H), 2.30 (d, *J* = 16.3 Hz, 1H), 2.28 – 2.22 (d, *J* = 18.3 Hz, 1H), 2.01 (s, 3H). <sup>13</sup>C NMR (101 MHz, CDCl<sub>3</sub>) δ 195.30, 177.50, 158.01, 137.88, 135.09, 130.62, 126.16, 123.29, 120.83, 115.54, 48.13, 42.36, 37.77, 29.53, 23.96. ESI-MS: *m/z* calcd for [C<sub>15</sub>H<sub>14</sub>ClNO<sub>2</sub>, M + H]<sup>+</sup> : 276.0786, found: 276.0778. IR ν (cm<sup>-1</sup>) 2951, 2918, 2887, 2849, 1712, 1669, 1603, 1462, 789.

**(*R*)-7'-fluoro-1',3-dimethylspiro[cyclohexane-1,3'-indolin]-3-ene-2',5-dione (3m)**

The title compound was isolated by column chromatography (petroleum ether/ethyl

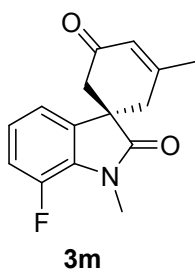

acetate = 2:1) in 55 % yield. White solid, mp 110 – 111 °C, 82%

*ee* [Daicel Chiralpak AD-H, hexanes/*i*-PrOH = 80/20, flow rate:

1.0 mL·min<sup>-1</sup>, λ = 254.4 nm, t (minor) = 6.404, t (major) = 7.493],

[α]<sub>D</sub><sup>20</sup> = +132.2 (c 0.09, CHCl<sub>3</sub>). <sup>1</sup>H NMR (400 MHz, CDCl<sub>3</sub>) δ

7.07 – 6.99 (m, 2H), 6.90 (ddd, *J* = 8.6, 7.5, 4.6 Hz, 1H), 6.17 (s,

1H), 3.46 (d, *J* = 2.9 Hz, 3H), 3.00 (dd, *J* = 18.3, 1.1 Hz, 1H), 2.91 (d, *J* = 16.3 Hz, 1H),

2.34 – 2.21 (m, 2H), 2.01 (s, 3H). <sup>13</sup>C NMR (101 MHz, CDCl<sub>3</sub>) δ 195.35, 176.79,

158.08, 148.68, 146.25, 135.16 (d, *J* = 2.8 Hz), 126.18, 123.14 (d, *J* = 6.3 Hz), 118.26 (d,

*J* = 7.2 Hz), 116.25 (d, *J* = 19 Hz), 48.77, 42.38, 37.69, 28.54 (d, *J* = 5.9 Hz), 23.97.

<sup>19</sup>F NMR (376 MHz, CDCl<sub>3</sub>) δ -135.69. ESI-MS: *m/z* calcd for [C<sub>15</sub>H<sub>14</sub>FNO<sub>2</sub>, M +

Na]<sup>+</sup> : 282.0901, found: 282.0905. IR ν (cm<sup>-1</sup>) 2955, 2920, 2850, 1707, 1667, 1629,

1479, 1241, 1124, 788.

**(*R*)-1',3,7'-trimethylspiro[cyclohexane-1,3'-indolin]-3-ene-2',5-dione (3n)**

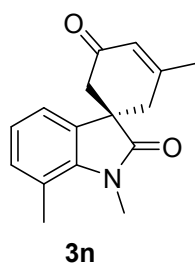

The title compound was isolated by column chromatography

(petroleum ether/ethyl acetate = 2:1) in 79% yield. White solid, mp

173 – 174 °C, 86% *ee* [Daicel Chiralpak AD-H, hexanes/*i*-PrOH =

80/20, flow rate: 1.0 mL·min<sup>-1</sup>, λ = 254.4 nm, t (major) = 7.207, t



(minor) = 8.642],  $[\alpha]_D^{20} = +148.9$  (c 0.65,  $\text{CHCl}_3$ ).  $^1\text{H NMR}$  (400 MHz,  $\text{CDCl}_3$ )  $\delta$  7.08 (d,  $J = 7.4$  Hz, 1H), 7.02 (d,  $J = 7.7$  Hz, 1H), 6.86 (t,  $J = 7.6$  Hz, 1H), 6.15 (s, 1H), 3.52 (s, 3H), 2.97 (dd,  $J = 18.3, 1.1$  Hz, 1H), 2.88 (d,  $J = 16.3$  Hz, 1H), 2.59 (s, 3H), 2.32–2.26 (m, 2H), 2.00 (s, 3H).  $^{13}\text{C NMR}$  (101 MHz,  $\text{CDCl}_3$ )  $\delta$  195.95, 178.05, 158.32, 139.62, 133.13, 131.98, 126.11, 122.42, 120.25, 119.72, 47.76, 42.61, 37.96, 29.46, 23.98, 18.67. ESI–MS:  $m/z$  calcd for  $[\text{C}_{16}\text{H}_{17}\text{NO}_2, \text{M} + \text{Na}]^+$  : 278.1151, found: 278.1152. IR  $\nu$  ( $\text{cm}^{-1}$ ) 3010, 2981, 2948, 2923, 1698, 1672, 1598, 1459, 1367, 745.

### (*R*)-3-methyl-1'-phenylspiro[cyclohexane-1,3'-indolin]-3-ene-2',5-dione (3o)

The title compound was isolated by column chromatography (petroleum ether/ethyl

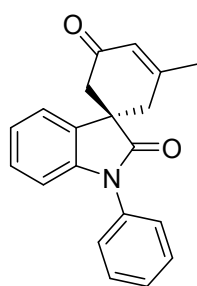

**3o**

acetate = 2:1) in 63% yield. White solid, mp 128 – 129 °C, 95% *ee*

[Daicel Chiralpak AD-H, hexanes/*i*-PrOH = 95/5, flow rate: 1.0

$\text{mL} \cdot \text{min}^{-1}$ ,  $\lambda = 254.4$  nm,  $t$  (minor) = 24.440,  $t$  (major) = 26.415],

$[\alpha]_D^{20} = +122.8$  (c 0.50,  $\text{CHCl}_3$ ).  $^1\text{H NMR}$  (400 MHz,  $\text{CDCl}_3$ )  $\delta$  7.54

(t,  $J = 7.7$  Hz, 2H), 7.47 – 7.38 (m, 3H), 7.31 (d,  $J = 7.2$  Hz, 1H),

7.22 (td,  $J = 7.8, 1.0$  Hz, 1H), 7.01 (t,  $J = 7.6$  Hz, 1H), 6.86 (d,  $J =$

7.9 Hz, 1H), 6.21 (s, 1H), 3.13 (d,  $J = 18.2$  Hz, 1H), 3.02 (d,  $J = 16.2$

Hz, 1H), 2.44 (dd,  $J = 22.8, 17.4$  Hz, 2H), 2.05 (s, 3H).  $^{13}\text{C NMR}$  (101 MHz,  $\text{CDCl}_3$ )  $\delta$

195.58, 176.64, 158.28, 141.88, 133.61, 132.20, 129.23, 128.18, 127.85, 126.25,

126.04, 122.95, 122.76, 109.43, 48.71, 42.72, 37.96, 24.04. ESI–MS:  $m/z$  calcd for

$[\text{C}_{20}\text{H}_{17}\text{NO}_2, \text{M} + \text{Na}]^+$  : 326.1151, found: 326.1155. IR  $\nu$  ( $\text{cm}^{-1}$ ) 3060, 2981, 2917,

2822, 1715, 1676, 1633, 1608, 1592, 1453, 1203, 698.

### (*R*)-1'-benzyl-3-methylspiro[cyclohexane-1,3'-indolin]-3-ene-2',5-dione (3p)

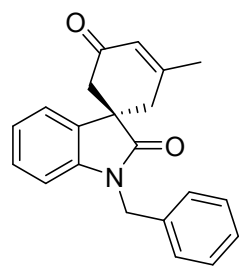

**3p**

The title compound was isolated by column chromatography

(petroleum ether/ethyl acetate = 2:1) in 60% yield. White solid, mp

43 – 44 °C, 89% *ee* [Daicel Chiralpak AD-H, hexanes/*i*-PrOH =

85/15, flow rate: 1.0  $\text{mL} \cdot \text{min}^{-1}$ ,  $\lambda = 254.4$  nm,  $t$  (minor) = 10.105,  $t$

(major) = 11.644],  $[\alpha]_D^{20} = +232.3$  (c 0.64,  $\text{CHCl}_3$ ).  $^1\text{H NMR}$  (400

MHz,  $\text{CDCl}_3$ )  $\delta$  7.32–7.17 (m, 7H), 6.93 (t,  $J = 7.3$  Hz, 1H), 6.76

(d,  $J = 7.6$  Hz, 1H), 6.19 (s, 1H), 4.93 (s, 2H), 3.04 (dd,  $J = 40.3, 17.3$  Hz, 2H), 2.34 (dd,  $J = 24.4, 13.0$  Hz, 2H), 2.03 (s, 3H).  $^{13}\text{C}$  NMR (101 MHz,  $\text{CDCl}_3$ )  $\delta$  195.68, 177.31, 158.38, 140.98, 135.01, 132.35, 128.43, 128.20, 127.31, 126.64, 126.24, 122.54, 122.51, 109.14, 48.55, 43.39, 42.62, 37.73, 24.03. ESI-MS:  $m/z$  calcd for  $[\text{C}_{21}\text{H}_{19}\text{NO}_2, \text{M} + \text{Na}]^+$ : 340.1308, found: 340.1310. IR  $\nu$  ( $\text{cm}^{-1}$ ) 3058, 3031, 2915, 2854, 1708, 1666, 1637, 1609, 1486, 1410, 1377, 730.

**(1R,3S)-3-hydroxy-1',3-dimethylspiro[cyclohexane-1,3'-indoline]-2',5-dione (2a)**

The title compound was isolated by column chromatography (petroleum ether/ethyl acetate = 2:1) in 68% yield. White solid, mp 195 – 196 °C, 1:20 *dr*, 99% *ee* [Daicel Chiralpak AD-H, hexanes/*i*-PrOH = 80/20, flow rate: 1.0  $\text{mL} \cdot \text{min}^{-1}$ ,  $\lambda = 254.4$  nm,  $t$  (minor) = 9.559,  $t$  (major) = 11.949],  $[\alpha]_{\text{D}}^{20} = +74.4$  (c 0.25,  $\text{CHCl}_3$ ).

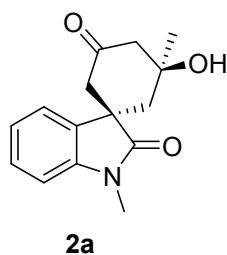

MHz,  $\text{CDCl}_3$ )  $\delta$  7.34 (td,  $J = 7.7, 1.0$  Hz, 1H), 7.23 (d,  $J = 6.9$  Hz, 1H), 7.16 (t,  $J = 7.5$  Hz, 1H), 6.89 (d,  $J = 7.8$  Hz, 1H), 5.84 (s, 1H), 3.22 (s, 3H), 2.80 (dt,  $J = 14.8, 2.1$  Hz, 1H), 2.74 – 2.65 (m, 2H), 2.42 (dt,  $J = 14.4, 1.9$  Hz, 1H), 2.31 (d,  $J = 14.9$  Hz, 1H), 2.07 (dt,  $J = 15.0, 2.0$  Hz, 1H), 1.41 (s, 3H).  $^{13}\text{C}$  NMR (101 MHz,  $\text{CDCl}_3$ )  $\delta$  205.73, 180.48, 141.86, 131.51, 128.53, 123.31, 121.90, 108.51,

73.05, 54.02, 50.70, 46.65, 42.54, 30.77, 26.11. ESI-MS:  $m/z$  calcd for  $[\text{C}_{15}\text{H}_{17}\text{NO}_3, \text{M} + \text{Na}]^+$ : 282.1104, found: 282.1100. IR  $\nu$  ( $\text{cm}^{-1}$ ) 3345, 3059, 2961, 2923, 2873, 1712, 1683, 1609, 1492, 1471, 1377, 1360, 753.

**(1R,3S)-3-hydroxy-1',3,5'-trimethylspiro[cyclohexane-1,3'-indoline]-2',5-dione (2b)**

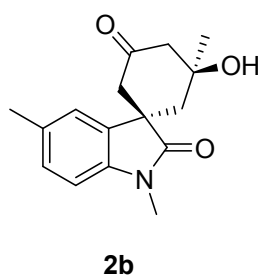

The title compound was isolated by column chromatography (petroleum ether/ethyl acetate = 2:1) in 56% yield. White solid, mp 199 – 200 °C, 1:11 *dr*, 95% *ee* [Daicel Chiralpak AD-H, hexanes/*i*-PrOH = 90/10, flow rate: 1.0  $\text{mL} \cdot \text{min}^{-1}$ ,  $\lambda = 254.4$  nm,  $t$  (minor) = 15.554,  $t$  (major) = 20.370],  $[\alpha]_{\text{D}}^{20} = +584.0$  (c 0.15,

$\text{CHCl}_3$ ).  $^1\text{H}$  NMR (400 MHz,  $\text{CDCl}_3$ )  $\delta$  7.13 (dd,  $J = 7.9, 0.7$  Hz, 1H), 7.05 (s, 1H), 6.77 (d,  $J = 7.9$  Hz, 1H), 5.88 (s, 1H), 3.20 (s, 3H), 2.83 – 2.76 (m, 1H), 2.67 (t,  $J = 14.8$  Hz,

2H), 2.42 (dt,  $J = 14.4, 1.9$  Hz, 1H), 2.37 (s, 3H), 2.30 (d,  $J = 3.8$  Hz, 1H), 2.06 (dt,  $J = 14.9, 2.1$  Hz, 1H), 1.41 (d,  $J = 0.8$  Hz, 3H).  $^{13}\text{C}$  NMR (101 MHz,  $\text{CDCl}_3$ )  $\delta$  205.81, 180.38, 139.47, 133.01, 131.55, 128.71, 122.75, 108.22, 72.98, 54.03, 50.73, 46.72, 42.63, 30.79, 26.11, 20.70. ESI-MS:  $m/z$  calcd for  $[\text{C}_{16}\text{H}_{19}\text{NO}_3, \text{M} + \text{Na}]^+$  : 296.1257, found: 296.1258. IR  $\nu$  ( $\text{cm}^{-1}$ ) 3395, 3331, 2964, 2920, 2850, 1711, 1677, 1604, 1501, 1433, 1370, 1261, 1099, 815.

**(1R,3S)-3-hydroxy-5'-methoxy-1',3-dimethylspiro[cyclohexane-1,3'-indoline]-2',5-dione (2c)**

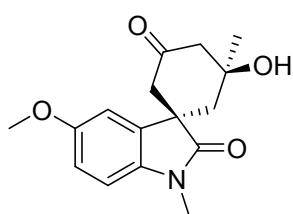

**2c**

The title compound was isolated by column chromatography (petroleum ether/ethyl acetate = 2:1) in 59% yield. White solid, mp 193 – 194 °C, 1:3 *dr*, 82% *ee* [Daicel Chiralpak AD-H, hexanes/*i*-PrOH = 80/20, flow rate: 1.0 mL·min<sup>-1</sup>,  $\lambda = 254.4$  nm,  $t$  (minor) = 10.348,  $t$  (major) = 16.768],  $[\alpha]_{\text{D}}^{20} = +363.2$  (c 0.30,  $\text{CHCl}_3$ ).  $^1\text{H}$  NMR (400 MHz,  $\text{CDCl}_3$ )  $\delta$  6.87 – 6.77 (m, 3H), 5.93 (s, 1H), 3.82 (s, 3H), 3.19 (s, 3H), 2.82 – 2.75 (m, 1H), 2.67 (dd,  $J = 22.7, 14.6$  Hz, 2H), 2.45 – 2.39 (m, 1H), 2.27 (d,  $J = 15.2$  Hz, 1H), 2.07 (dd,  $J = 14.9, 1.9$  Hz, 1H), 1.41 (s, 3H).  $^{13}\text{C}$  NMR (101 MHz,  $\text{CDCl}_3$ )  $\delta$  205.64, 180.04, 156.44, 135.18, 132.82, 112.34, 109.68, 108.90, 72.96, 55.40, 54.02, 51.05, 46.71, 42.63, 30.76, 26.17. ESI-MS:  $m/z$  calcd for  $[\text{C}_{16}\text{H}_{19}\text{NO}_4, \text{M} + \text{Na}]^+$  : 312.1206, found: 312.1208. IR  $\nu$  ( $\text{cm}^{-1}$ ) 3318, 2961, 2922, 2850, 2833, 1709, 1672, 1603, 1500, 1032, 803.

**(1R,3S)-3-hydroxy-1',3,5',7'-tetramethylspiro[cyclohexane-1,3'-indoline]-2',5-dione (2d)**

The title compound was isolated by column chromatography (petroleum ether/ethyl acetate = 2:1) in 80% yield. White solid, mp 196 – 197 °C, 1:20 *dr*, 93% *ee* [Daicel Chiralpak AD-H, hexanes/*i*-PrOH = 85/15, flow rate: 1.0 mL·min<sup>-1</sup>,  $\lambda = 254.4$  nm,  $t$  (minor) = 8.447,  $t$  (major) = 9.225],  $[\alpha]_{\text{D}}^{20} = +166.2$  (c 0.23,  $\text{CHCl}_3$ ).  $^1\text{H}$  NMR (400 MHz,  $\text{CDCl}_3$ )  $\delta$  6.87 (d,  $J = 2.9$  Hz, 2H), 5.97 (s, 1H), 3.45 (s, 3H), 2.78 (dt,  $J = 14.6, 2.2$  Hz, 1H), 2.65 (dd,  $J = 26.3, 14.5$  Hz,

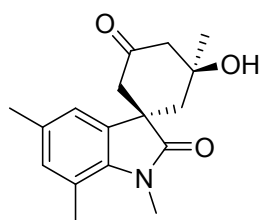

**2d**

2H), 2.53 (s, 3H), 2.38 (dt,  $J = 14.4$ , 2.0 Hz, 1H), 2.31 (s, 3H), 2.27 – 2.22 (m, 1H), 2.02 (dt,  $J = 14.9$ , 2.1 Hz, 1H), 1.40 (d,  $J = 0.7$  Hz, 3H).  $^{13}\text{C}$  NMR (101 MHz,  $\text{CDCl}_3$ )  $\delta$  205.81, 180.38, 139.47, 133.01, 131.55, 128.71, 122.75, 108.22, 72.98, 54.03, 50.73, 46.72, 42.63, 30.79, 26.11, 20.70. ESI–MS:  $m/z$  calcd for  $[\text{C}_{17}\text{H}_{21}\text{NO}_3, \text{M} + \text{Na}]^+$  : 310.1414, found: 310.1418. IR  $\nu$  ( $\text{cm}^{-1}$ ) 3331, 2968, 2920, 2850, 1716, 1671, 1603, 1365, 1224, 1134, 919, 645.

**(1R,3S)-3-hydroxy-1',3,7'-trimethylspiro[cyclohexane-1,3'-indoline]-2',5-dione**

**(2e)**

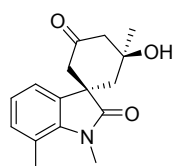

**2e**

The title compound was isolated by column chromatography (petroleum ether/ethyl acetate = 2:1) in 81% yield. White solid, mp 173 – 174 °C, 1:20 *dr*, 86% *ee* [Daicel Chiralcel AD-H, hexanes/*i*-PrOH = 80/20, flow rate: 1.0 mL·min<sup>-1</sup>,  $\lambda = 254.4$  nm,  $t$  (minor) = 8.437,  $t$  (major) = 9.320],  $[\alpha]_{\text{D}}^{20} = +38.3$  (c 0.35,  $\text{CHCl}_3$ ).  $^1\text{H}$  NMR (400 MHz,  $\text{CDCl}_3$ )  $\delta$  7.10 – 6.98 (m, 3H), 5.90 (s, 1H), 3.48 (s, 3H), 2.79 (dt,  $J = 14.6$ , 2.0 Hz, 1H), 2.73 – 2.59 (m, 2H), 2.58 (s, 3H), 2.40 (dd,  $J = 16.2$ , 1.9 Hz, 1H), 2.25 (d,  $J = 14.8$  Hz, 1H), 2.04 (d,  $J = 14.8$  Hz, 1H), 1.40 (s, 3H).  $^{13}\text{C}$  NMR (101 MHz,  $\text{CDCl}_3$ )  $\delta$  205.80, 181.11, 139.60, 132.18, 132.16, 123.12, 120.21, 119.82, 72.97, 54.02, 50.03, 46.97, 42.87, 30.80, 29.45, 18.35. ESI–MS:  $m/z$  calcd for  $[\text{C}_{16}\text{H}_{19}\text{NO}_3, \text{M} + \text{Na}]^+$  : 296.1257, found: 296.1266. IR  $\nu$  ( $\text{cm}^{-1}$ ) 3383, 3260, 2989, 2920, 2850, 1709, 1674, 1458, 1374, 743.

**4. Single-Crystal X-ray Crystallography of 2a**

Crystal data and structure refinement for **2a**

|                   |                                                   |
|-------------------|---------------------------------------------------|
| Empirical formula | $\text{C}_{15} \text{H}_{18} \text{N} \text{O}_3$ |
| Formula weight    | 260.30                                            |
| Temperature       | 140(2) K                                          |
| Wavelength        | 1.54178 Å                                         |
| Crystal system    | Triclinic                                         |
| Space group       | P 1                                               |

|                                   |                                                   |                  |
|-----------------------------------|---------------------------------------------------|------------------|
| Unit cell dimensions              | a = 5.9370(3) Å                                   | α = 105.428(4)°. |
|                                   | b = 5.9425(3) Å                                   | β = 101.284(4)°. |
|                                   | c = 10.0505(7) Å                                  | γ = 99.757(3)°.  |
| Volume                            | 325.87(3) Å <sup>3</sup>                          |                  |
| Z                                 | 1                                                 |                  |
| Density (calculated)              | 1.326 Mg/m <sup>3</sup>                           |                  |
| Absorption coefficient            | 0.750 mm <sup>-1</sup>                            |                  |
| F(000)                            | 139                                               |                  |
| Crystal size                      | 0.320 x 0.200 x 0.150 mm <sup>3</sup>             |                  |
| Theta range for data collection   | 4.718 to 65.989°.                                 |                  |
| Index ranges                      | -7 ≤ h ≤ 7, -6 ≤ k ≤ 7, -11 ≤ l ≤ 11              |                  |
| Reflections collected             | 2435                                              |                  |
| Independent reflections           | 1466 [R(int) = 0.0296]                            |                  |
| Completeness to theta = 67.679°   | 89.8 %                                            |                  |
| Absorption correction             | Semi-empirical from equivalents                   |                  |
| Max. and min. transmission        | 0.753 and 0.594                                   |                  |
| Refinement method                 | Full-matrix least-squares on F <sup>2</sup>       |                  |
| Data / restraints / parameters    | 1466 / 3 / 175                                    |                  |
| Goodness-of-fit on F <sup>2</sup> | 1.156                                             |                  |
| Final R indices [I > 2σ(I)]       | R <sub>1</sub> = 0.0508, wR <sub>2</sub> = 0.1544 |                  |
| R indices (all data)              | R <sub>1</sub> = 0.0509, wR <sub>2</sub> = 0.1544 |                  |
| Absolute structure parameter      | 0.29(17)                                          |                  |
| Extinction coefficient            | n/a                                               |                  |
| Largest diff. peak and hole       | 0.337 and -0.309 e.Å <sup>-3</sup>                |                  |

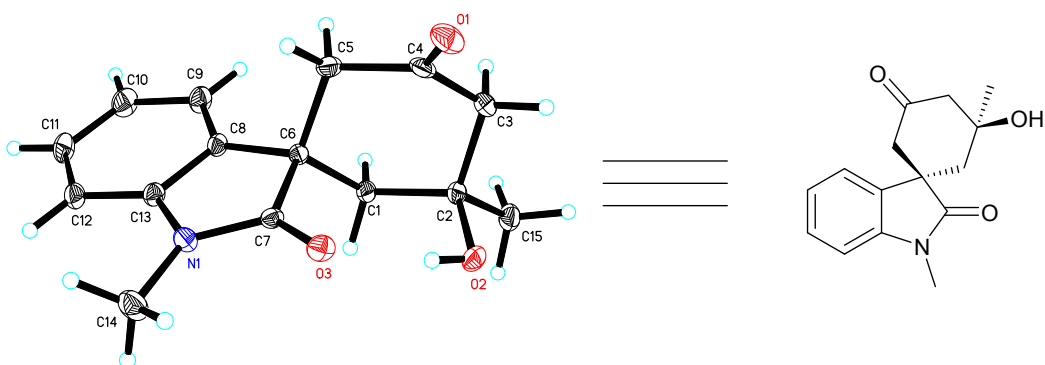

**Figure S1.** X-ray structure of compound **2a**.

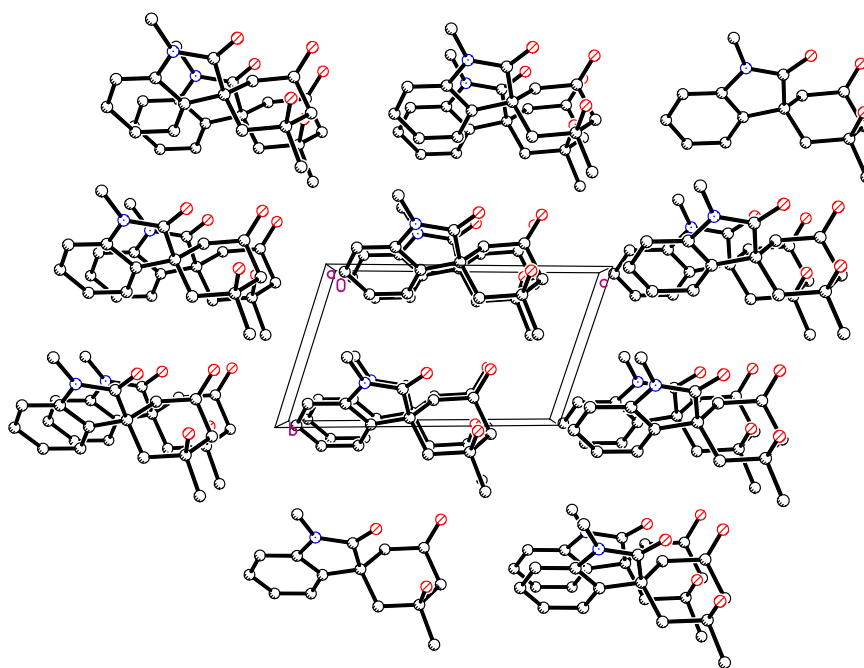

**Figure S2.** Packing of molecules in a unit cell for **2a**.

The crystal was prepared from the solution of **2a** in ethyl acetate and n-hexane. CCDC 1011578 contains the supplementary crystallographic data for this paper. These data can be obtained free of charge from The Cambridge Crystallographic Data Centre via [www.ccdc.cam.ac.uk/data\\_request/cif](http://www.ccdc.cam.ac.uk/data_request/cif).

## 5. <sup>1</sup>H NMR and <sup>13</sup>C NMR spectra

### 1,1'-(1-methyl-2-oxindoline-3,3-diyl)bis(propan-2-one) (1a)

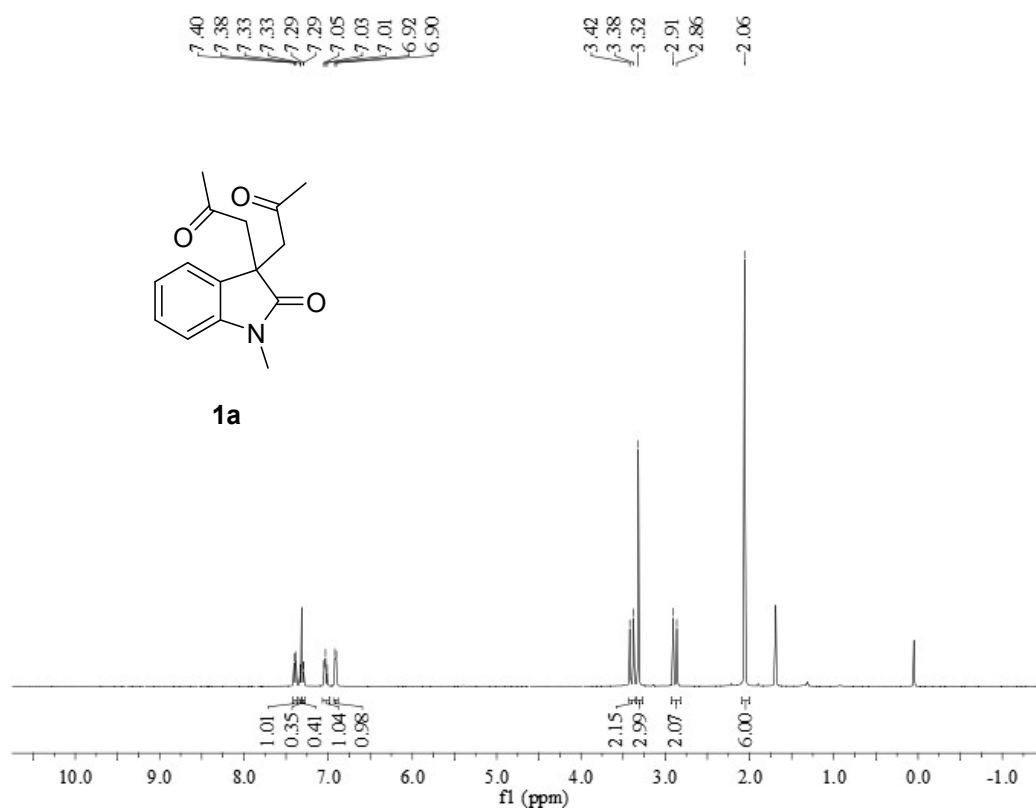

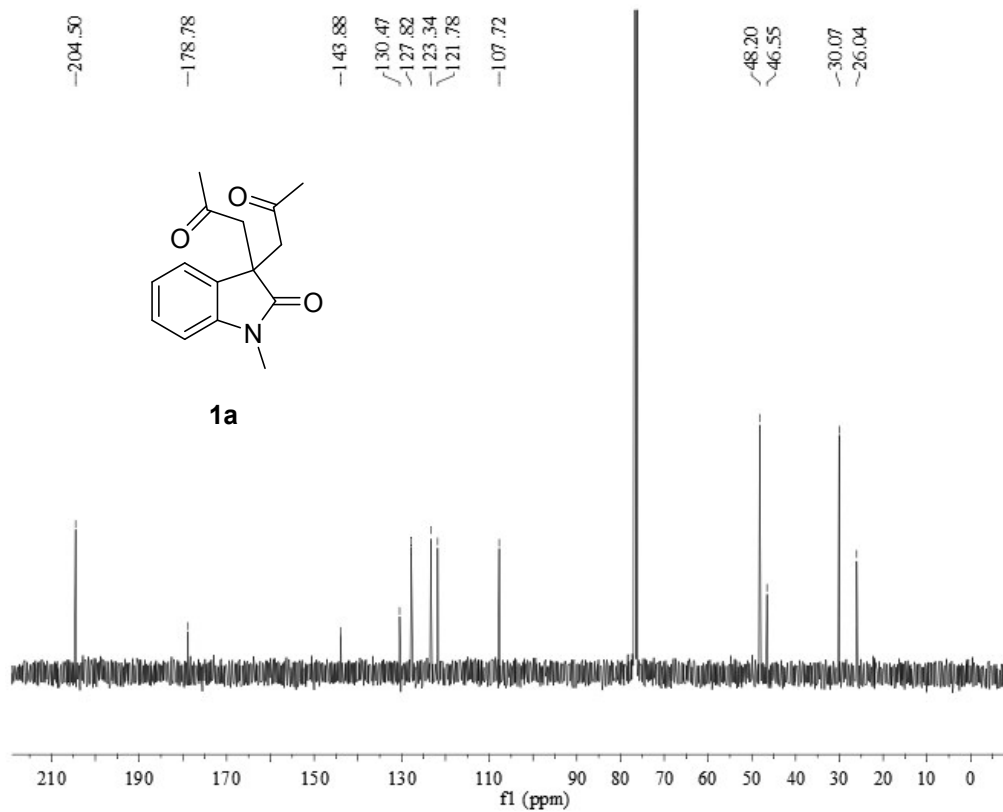

**1,1'-(1,5-dimethyl-2-oxoindoline-3,3-diyl)bis(propan-2-one) (1b)**

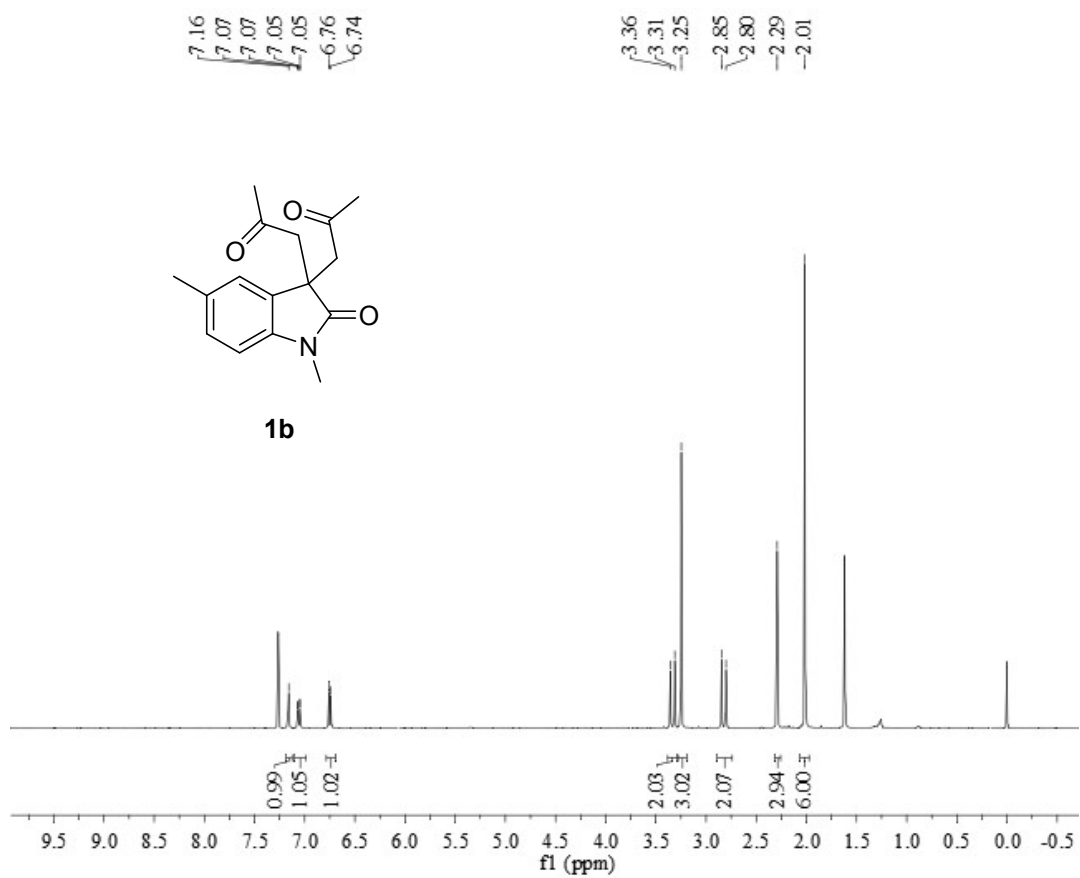



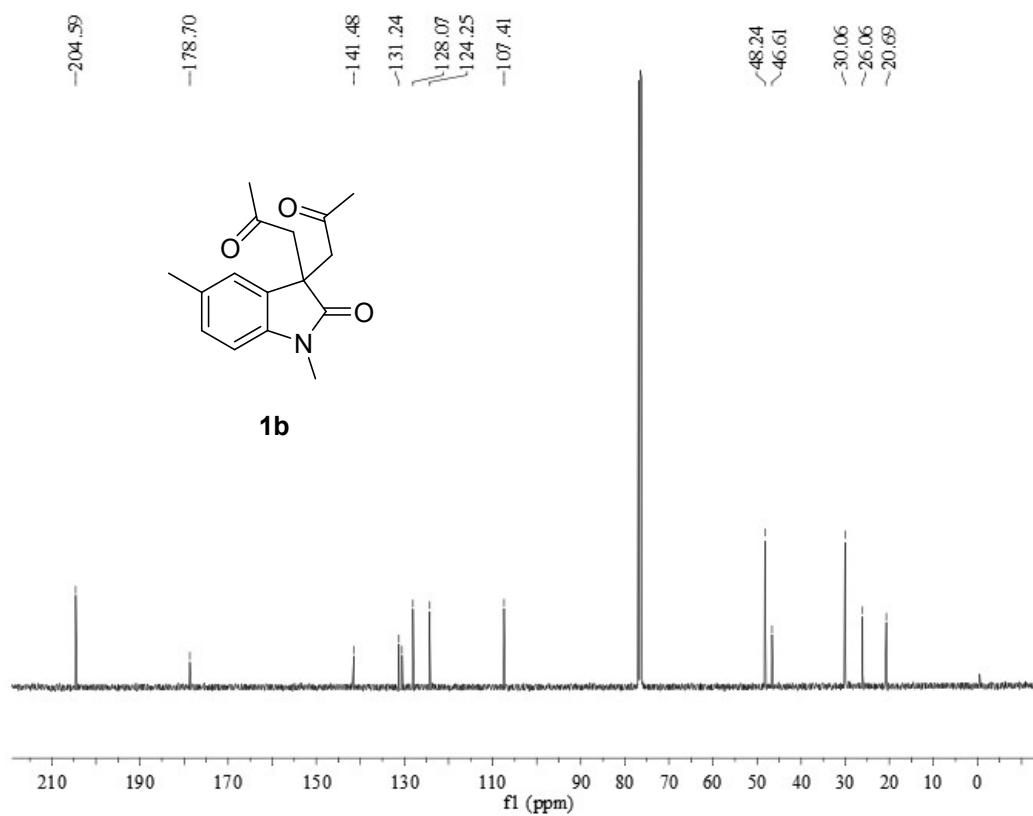

**1,1'-(5-methoxy-1-methyl-2-oxindoline-3,3-diyl)bis(propan-2-one) (1c)**

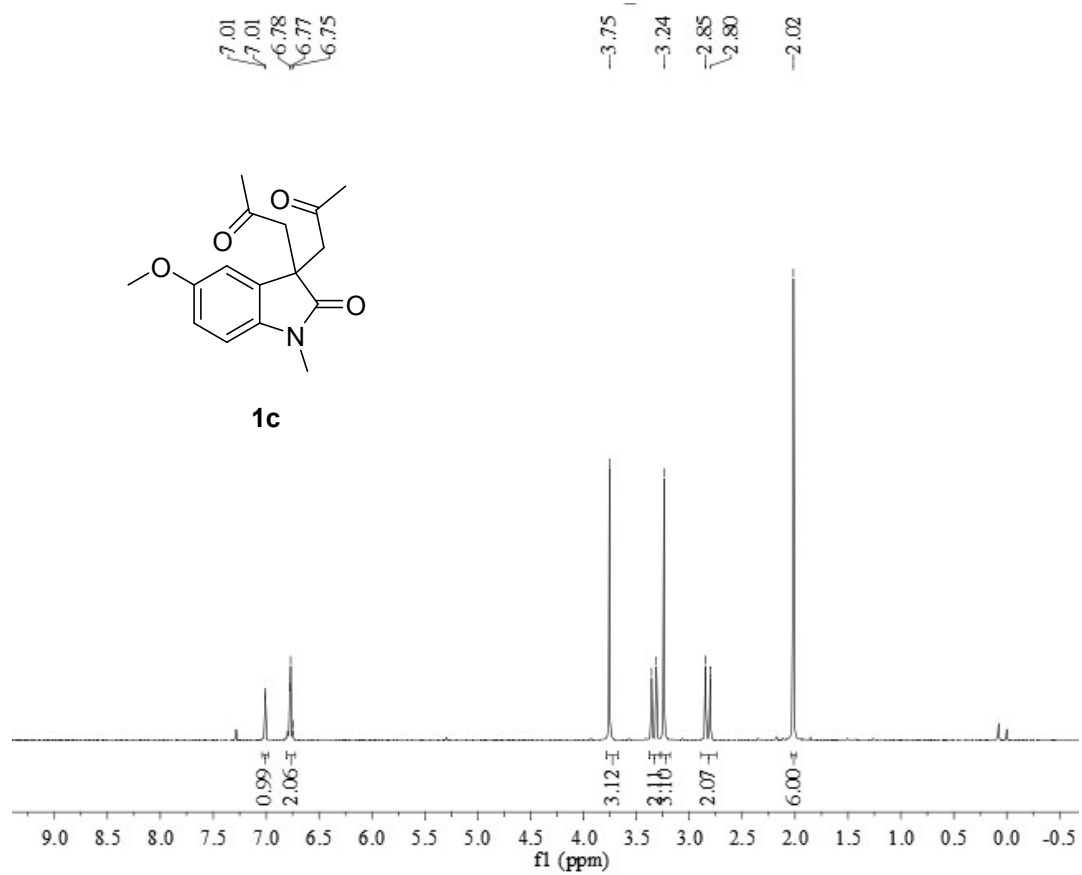

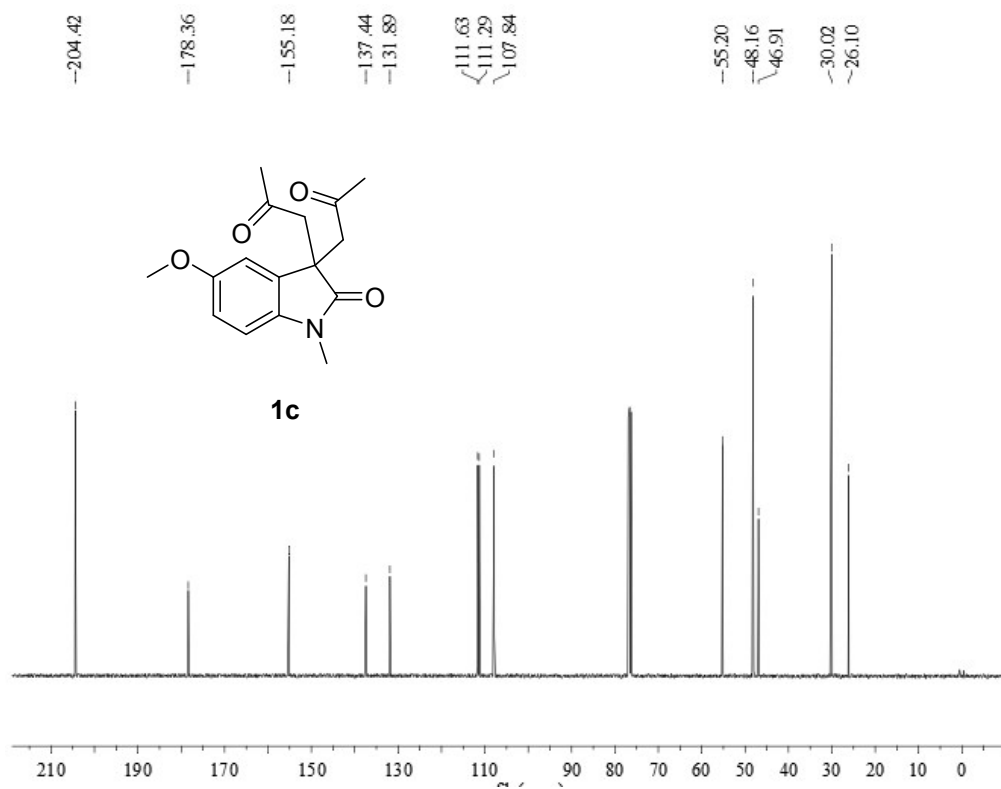

**1,1'-(1,5,7-trimethyl-2-oxindoline-3,3-diyl)bis(propan-2-one) (1d)**

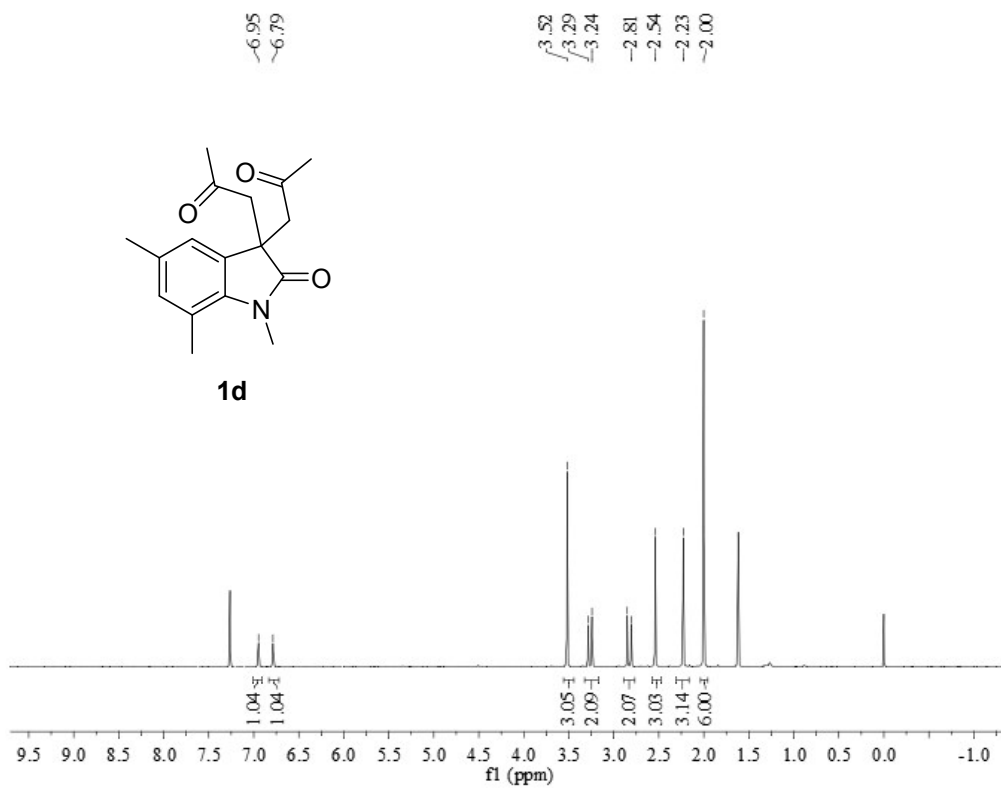

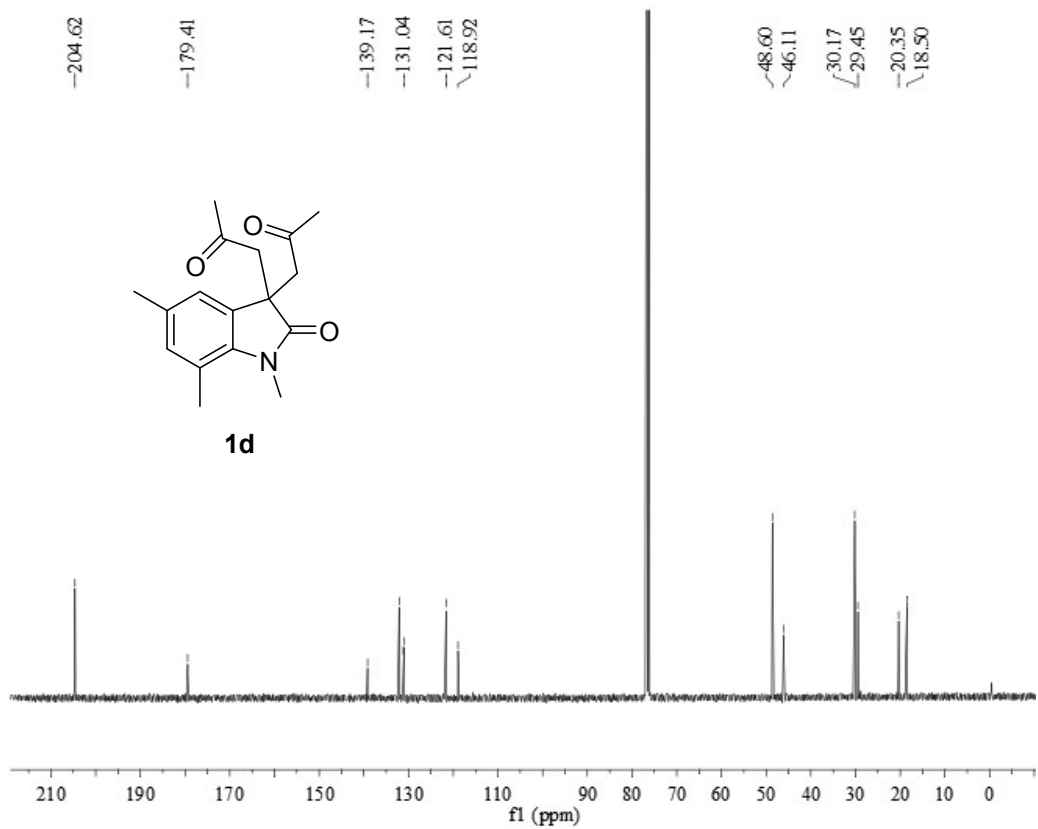

**1,1'-(5-fluoro-1-methyl-2-oxindoline-3,3-diyl)bis(propan-2-one) (1e)**

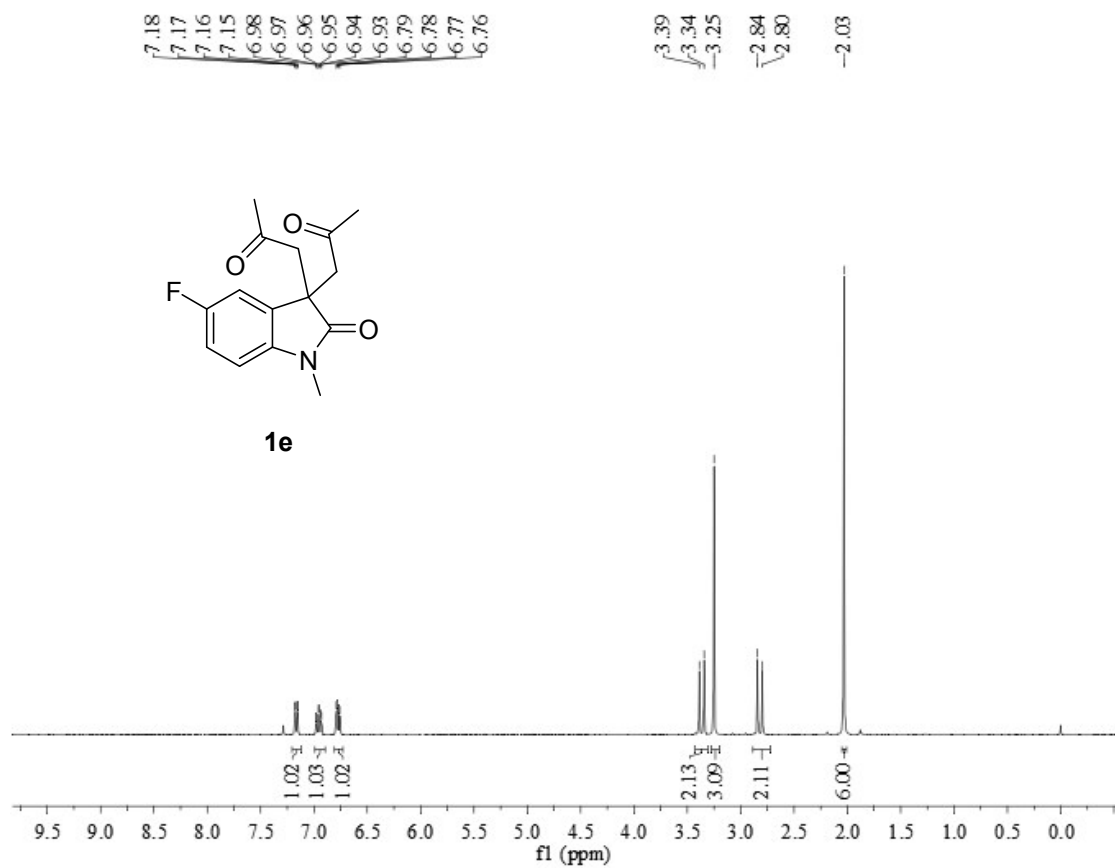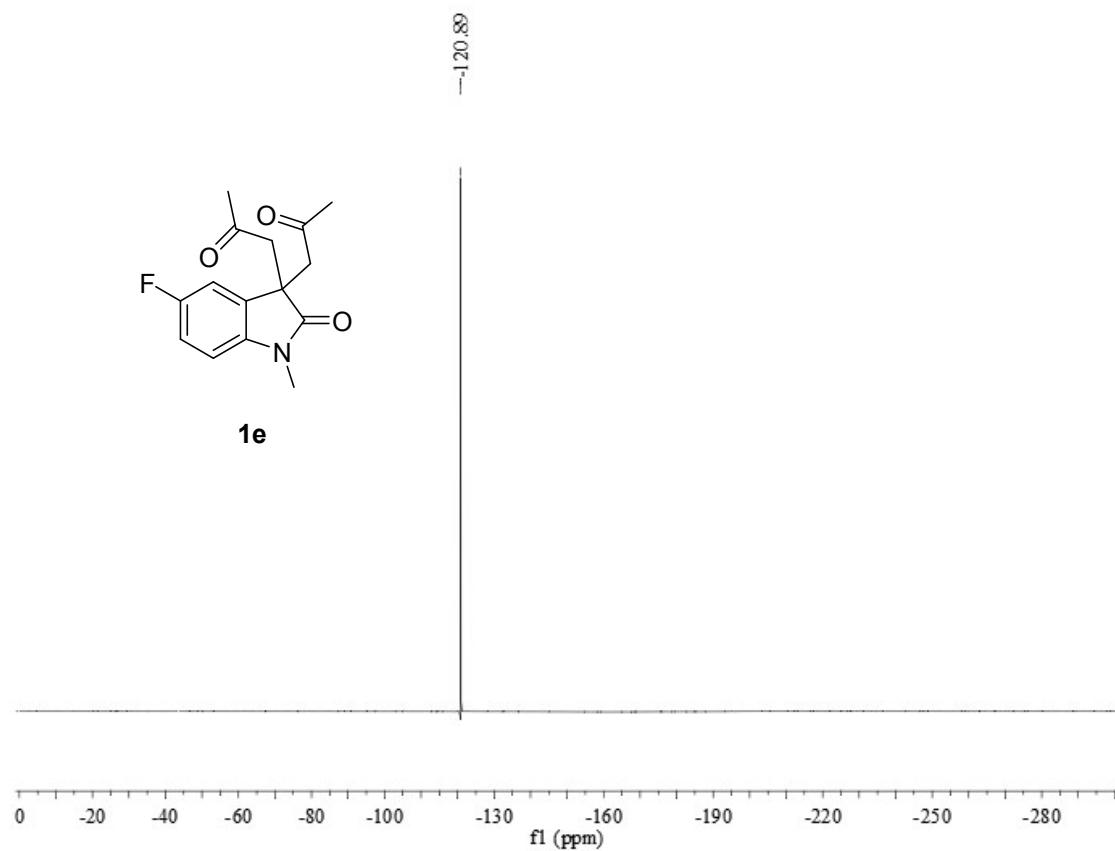

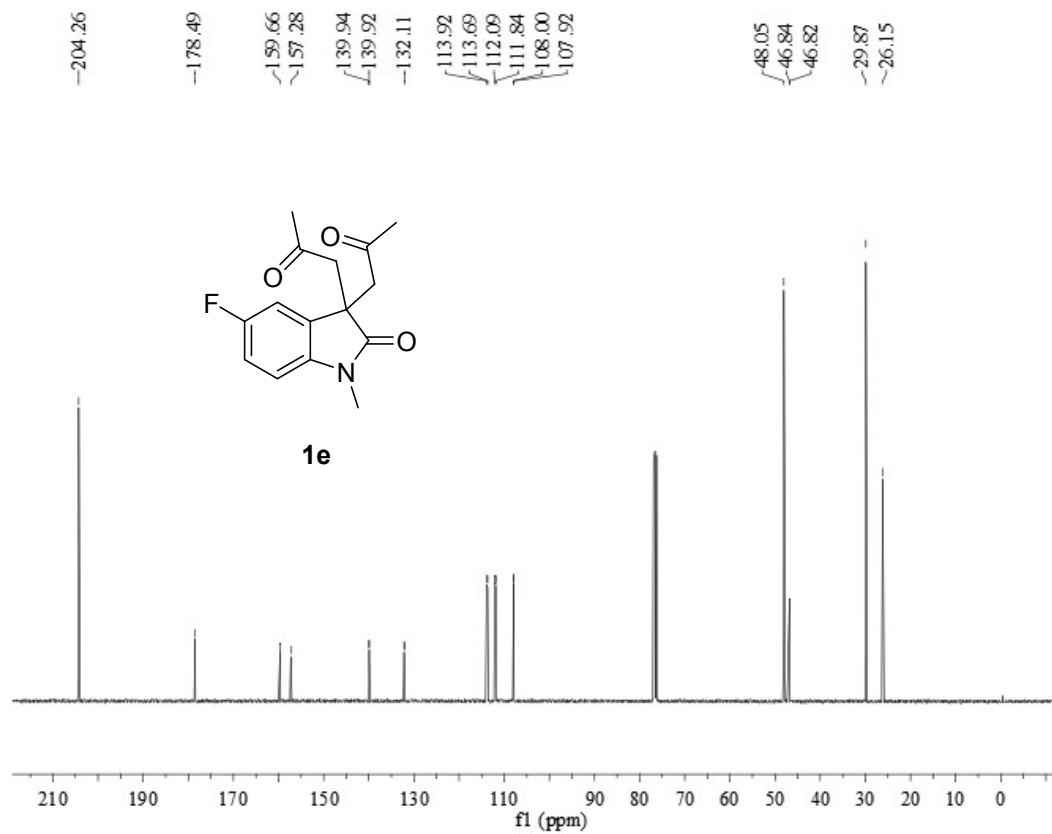

**1,1'-(5-chloro-1-methyl-2-oxindoline-3,3-diyl)bis(propan-2-one) (1f)**

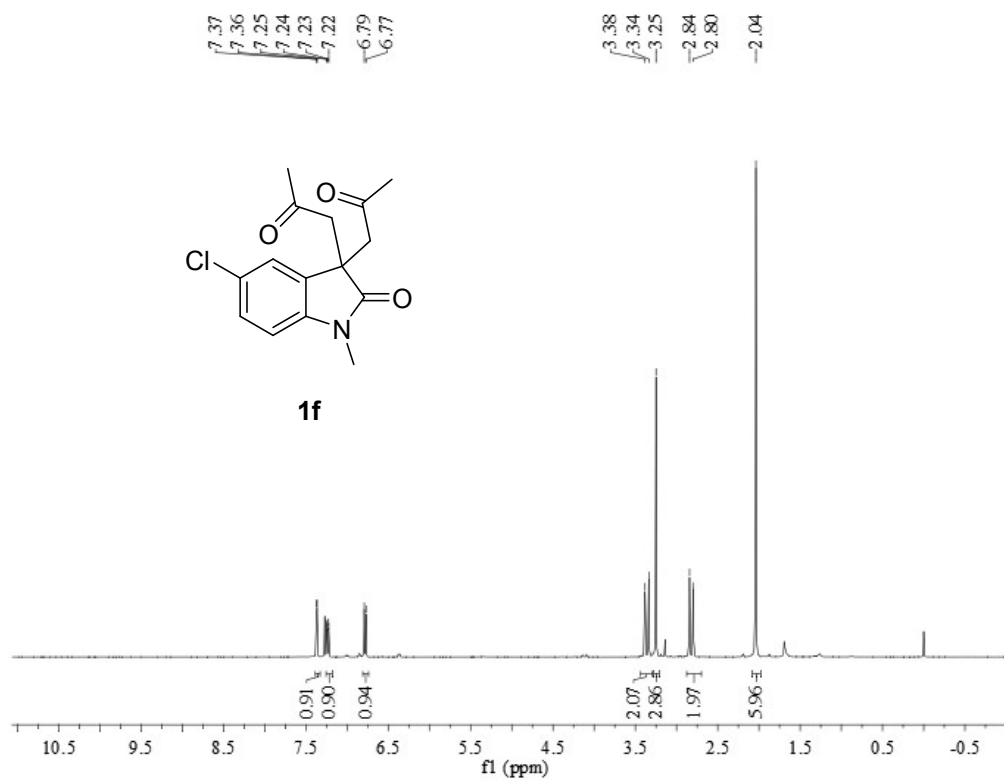

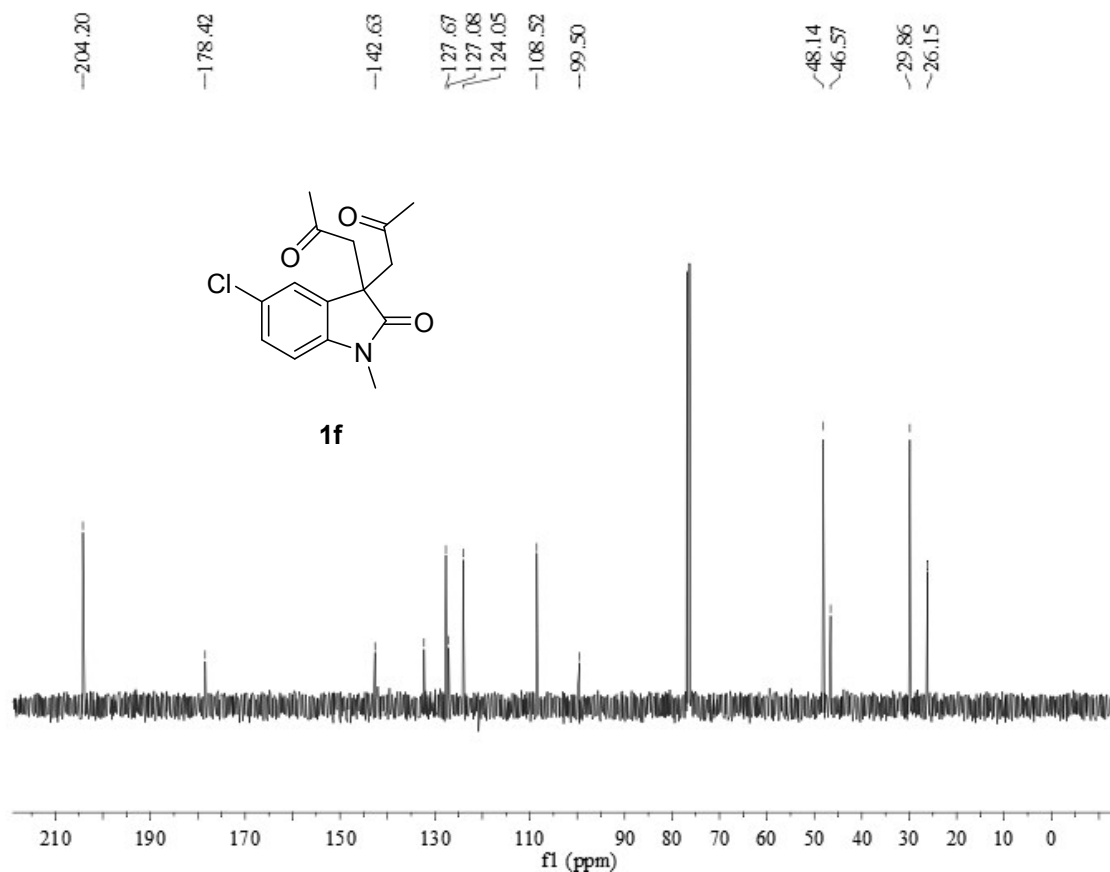

**1,1'-(5-bromo-1-methyl-2-oxindoline-3,3-diyl)bis(propan-2-one) (1g)**

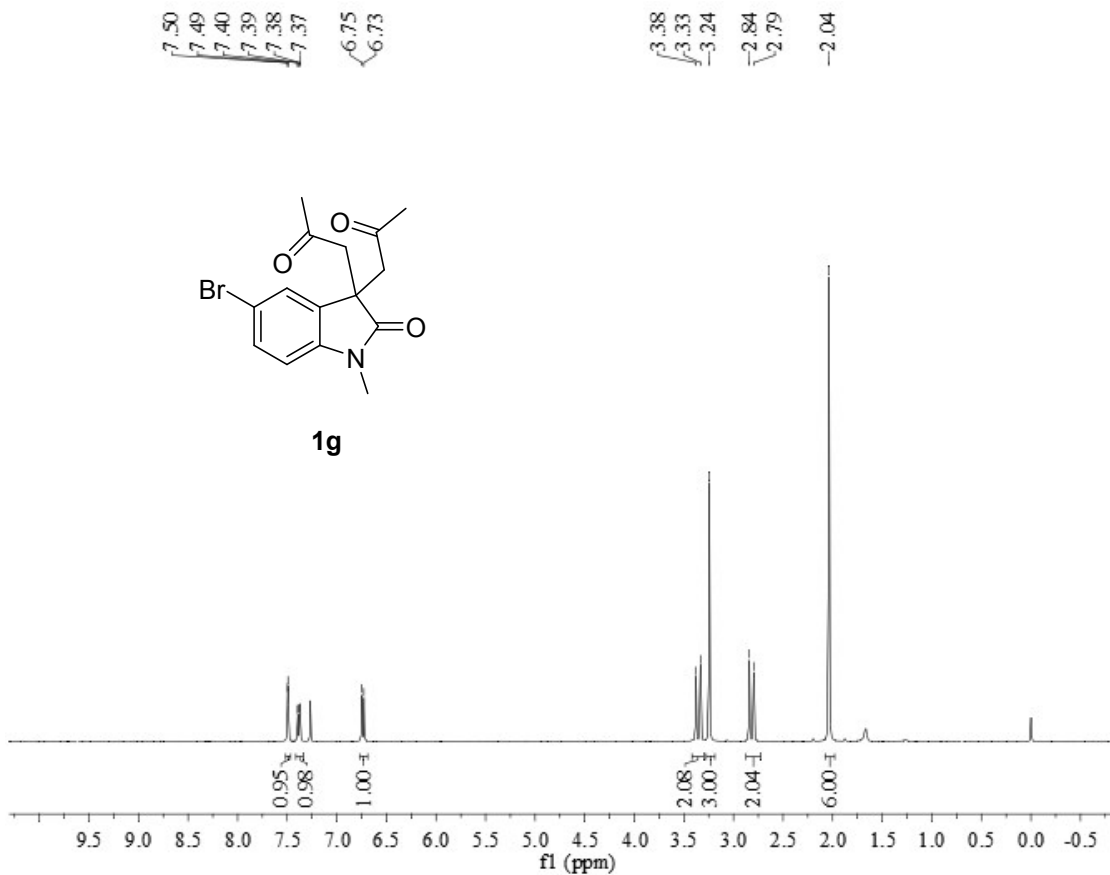

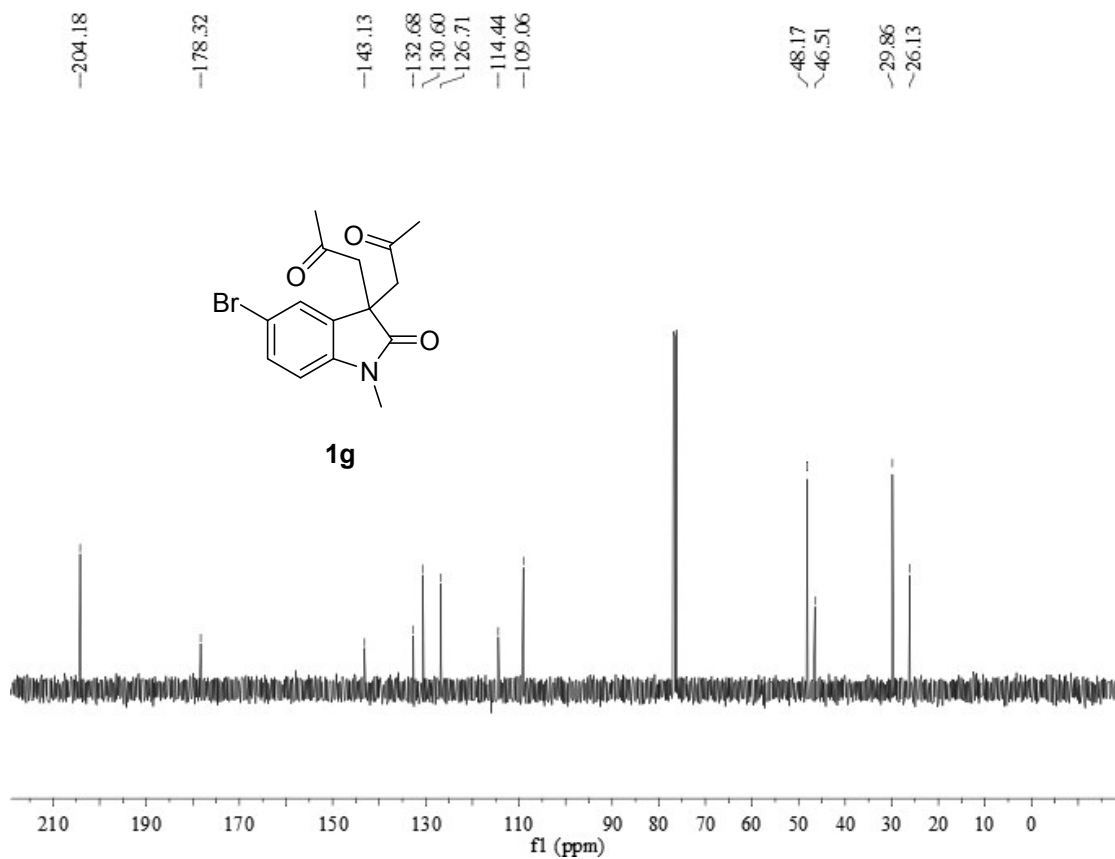

**1,1'-(4-chloro-1-methyl-2-oxindoline-3,3-diyl)bis(propan-2-one) (1h)**

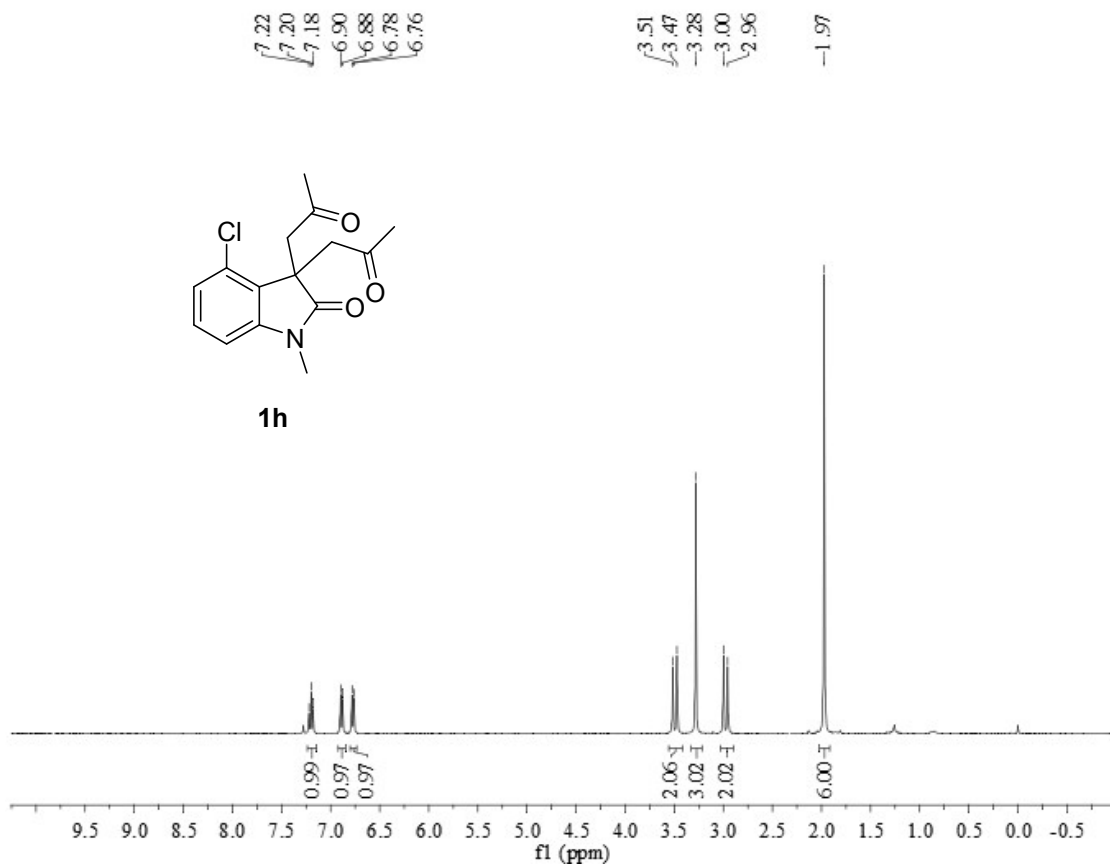

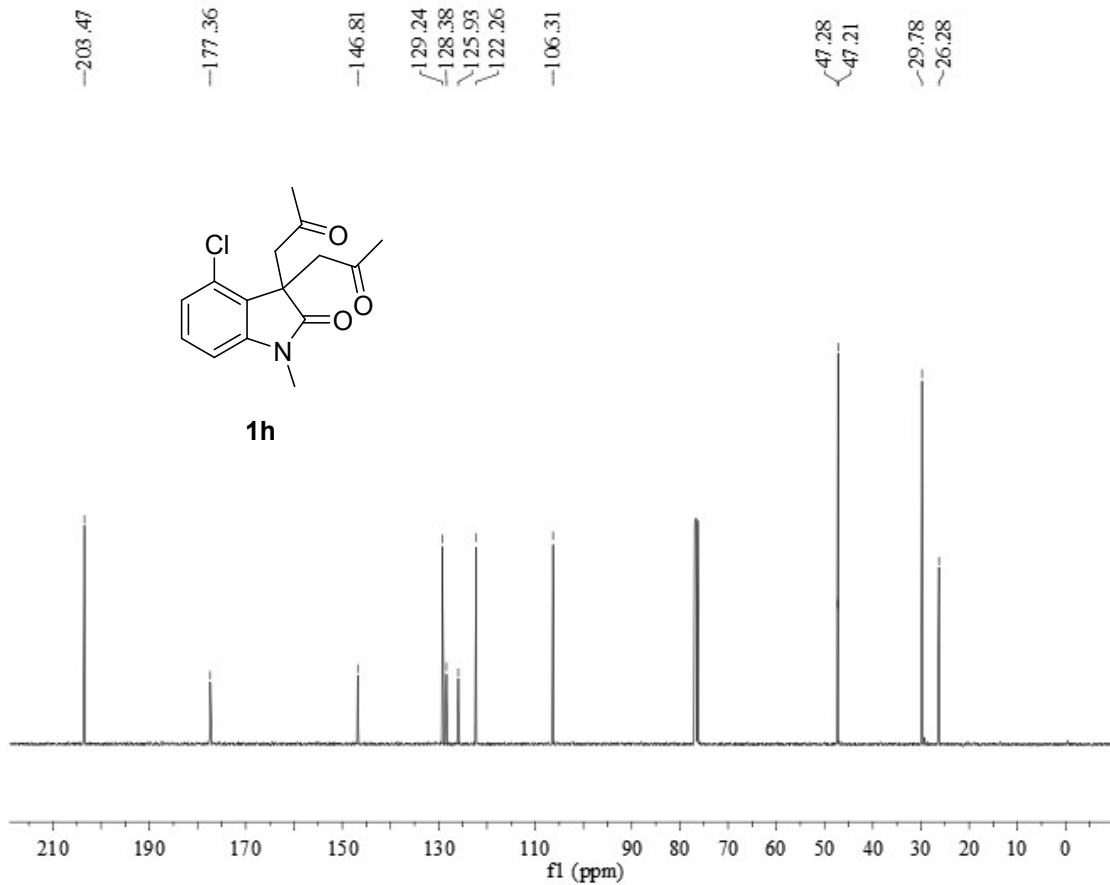

**1,1'-(4-bromo-1-methyl-2-oxindoline-3,3-diyl)bis(propan-2-one) (1i)**

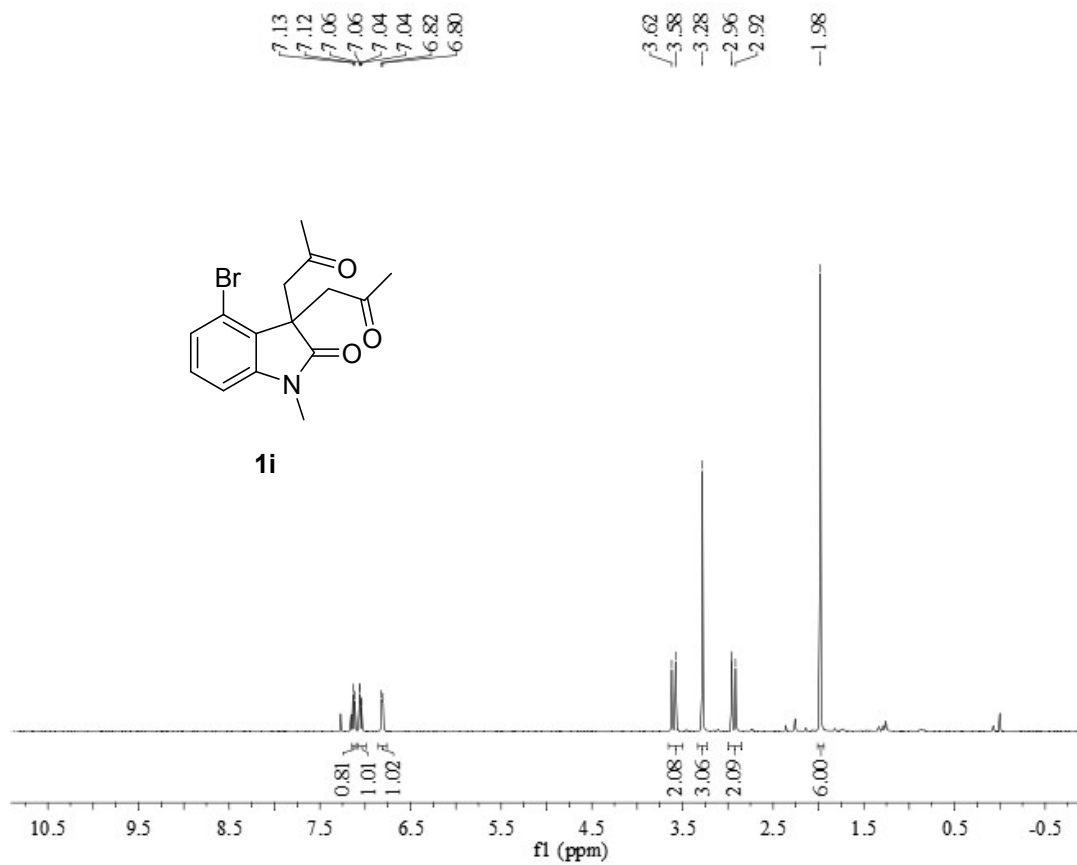



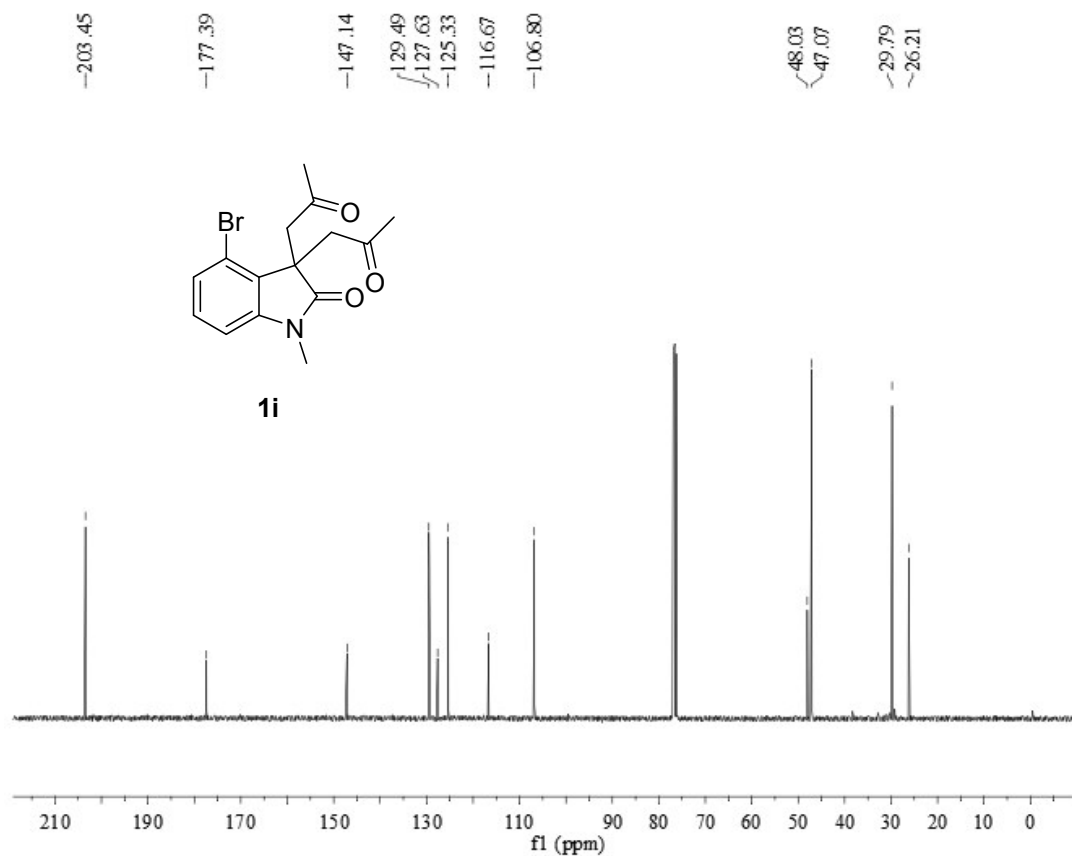

**1,1'-(6-bromo-1-methyl-2-oxindoline-3,3-diyl)bis(propan-2-one) (1j)**

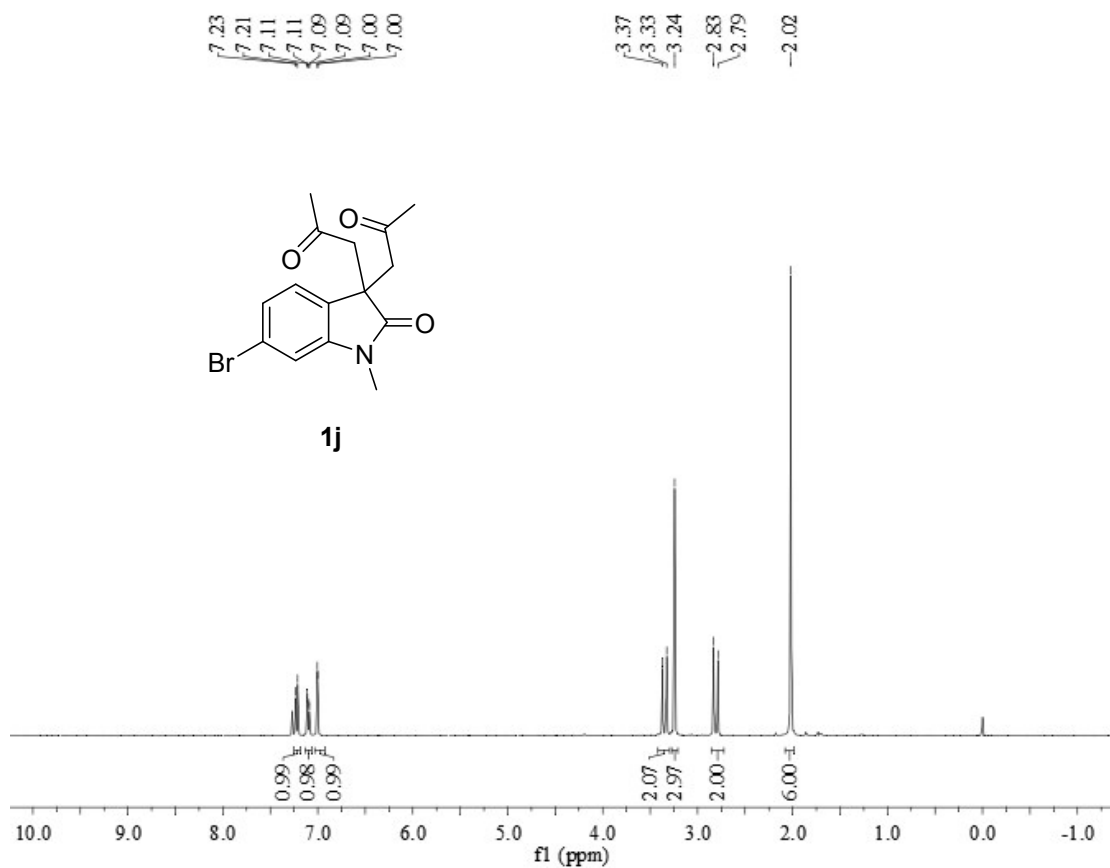

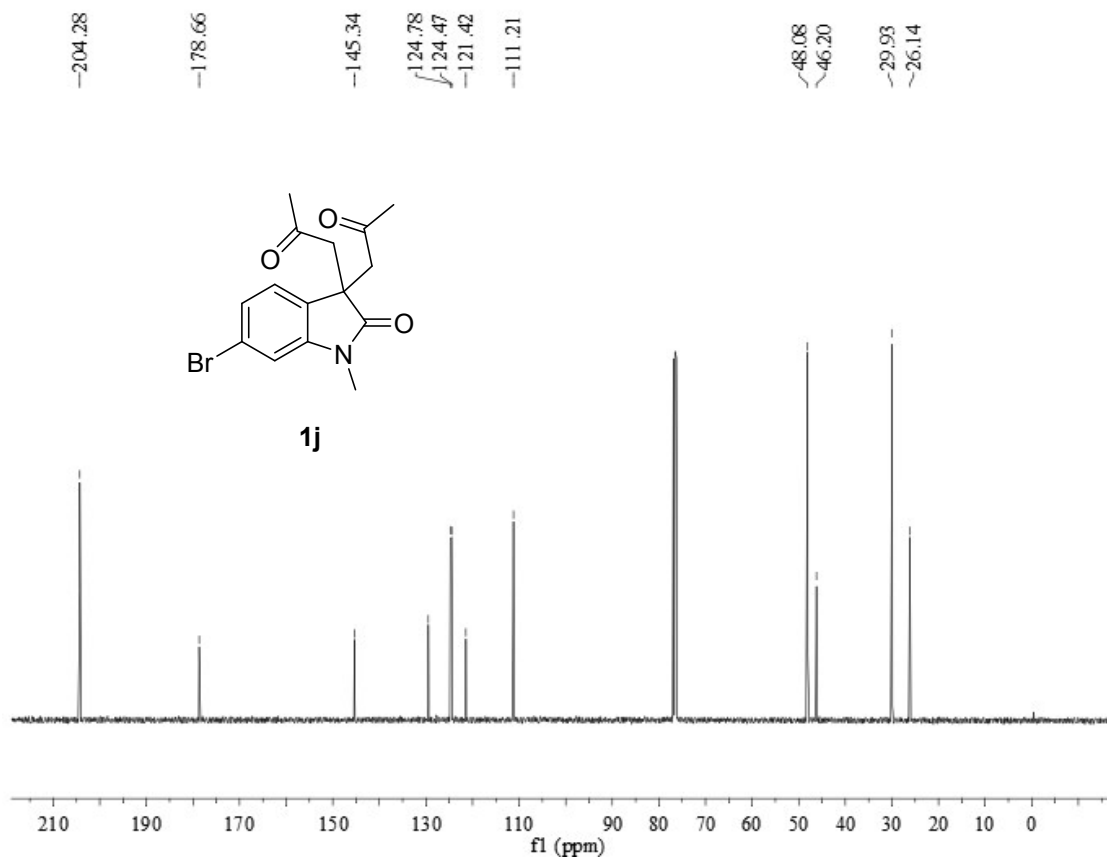

**1,1'-(6-chloro-1-methyl-2-oxindoline-3,3-diyl)bis(propan-2-one) (1k)**

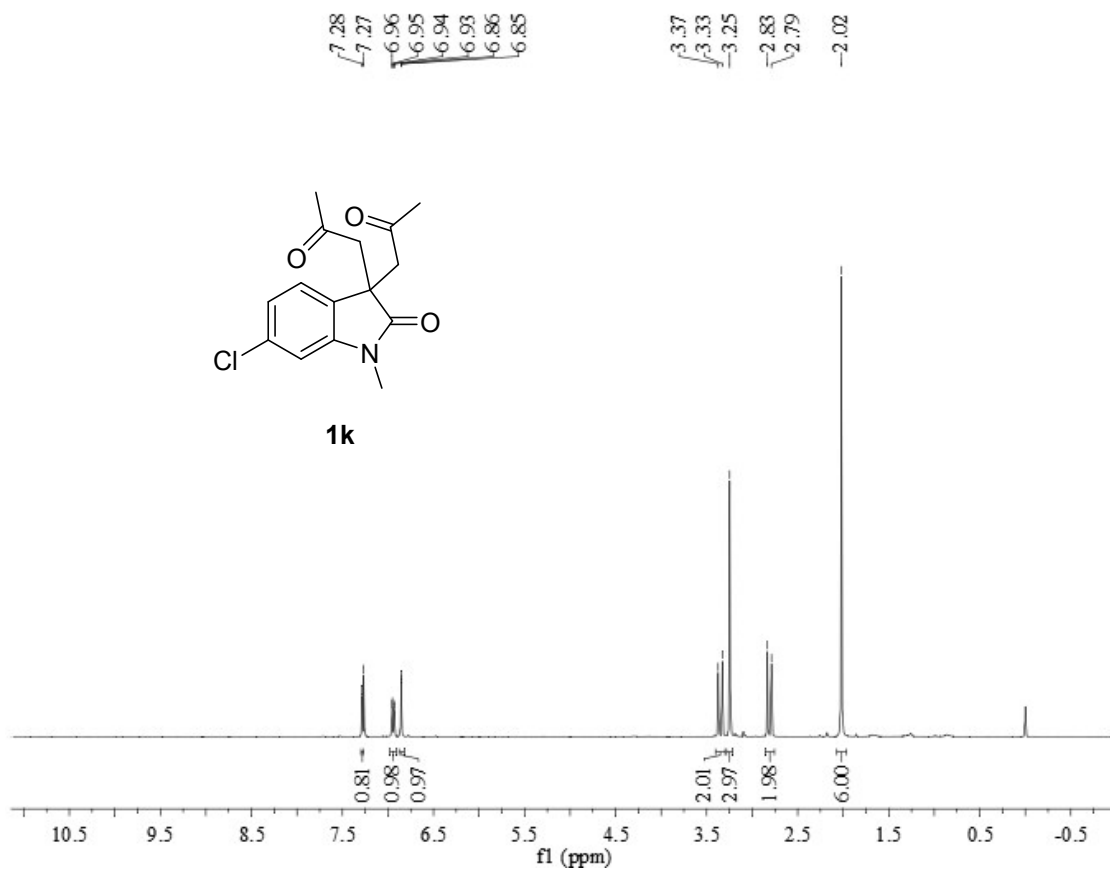

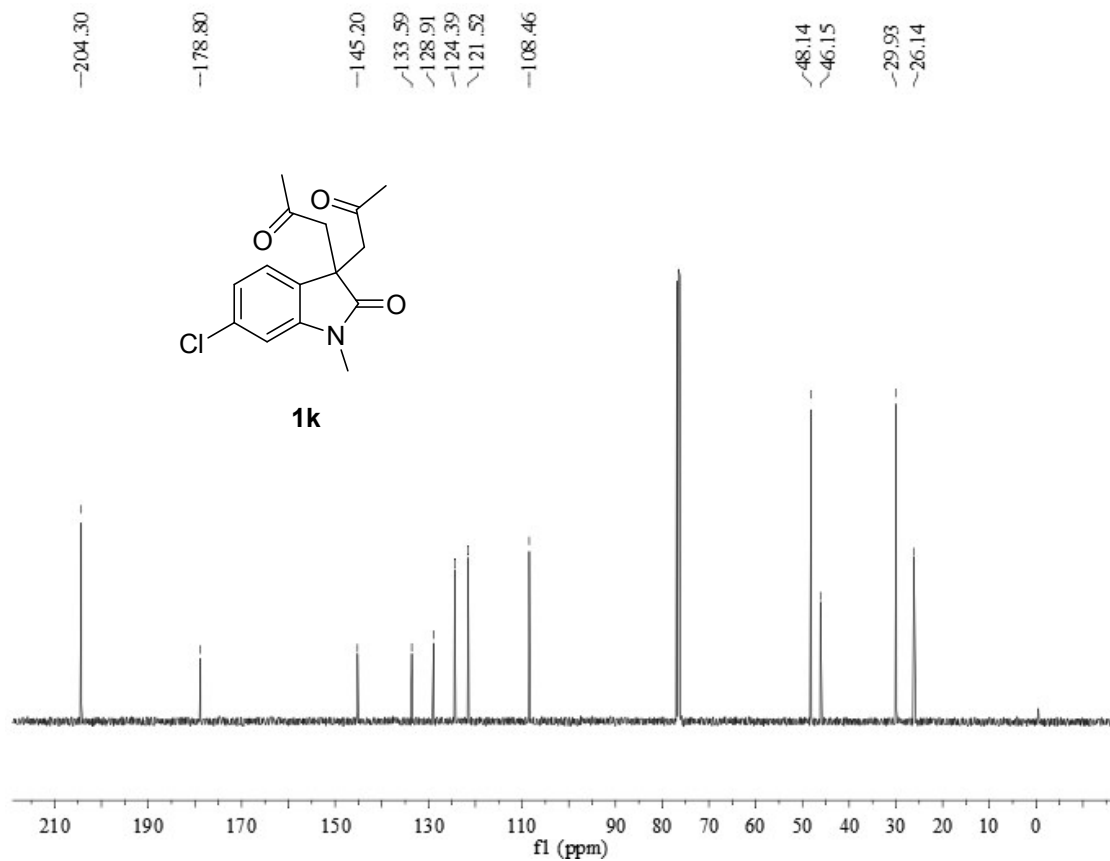

**1,1'-(7-chloro-1-methyl-2-oxindole-3,3-diyl)bis(propan-2-one) (1l)**

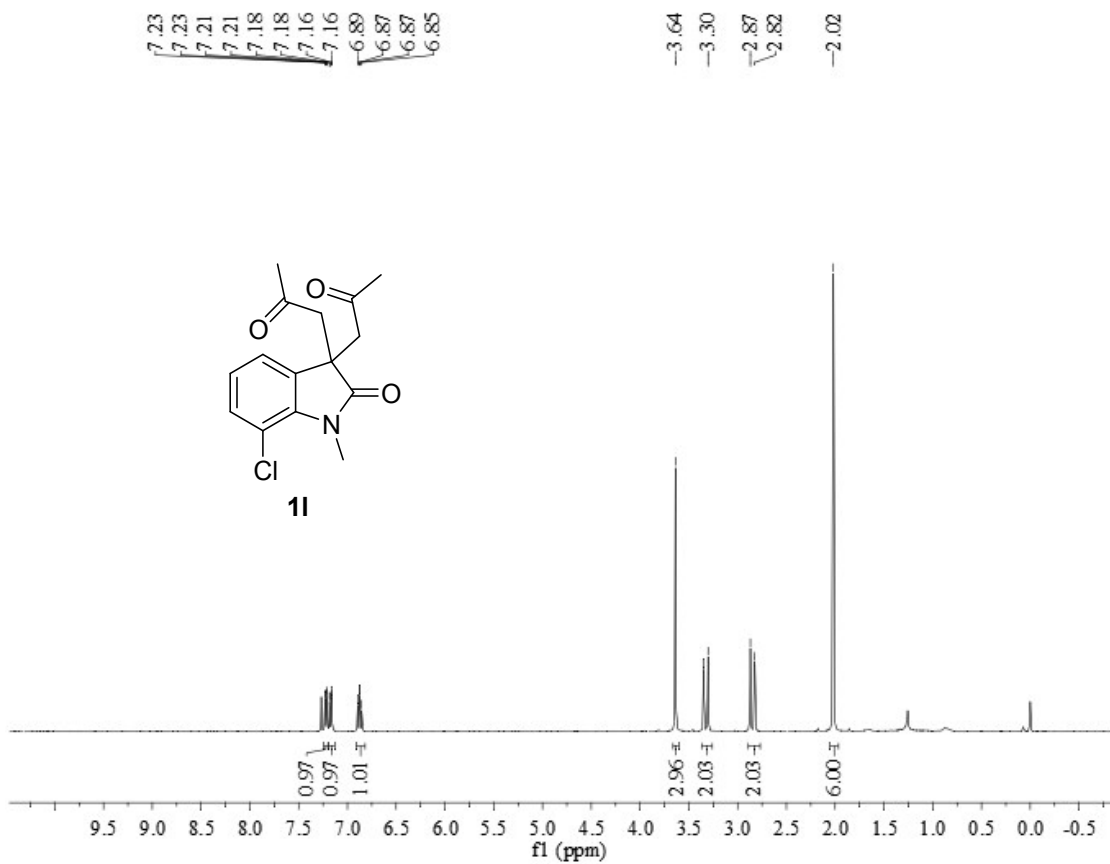

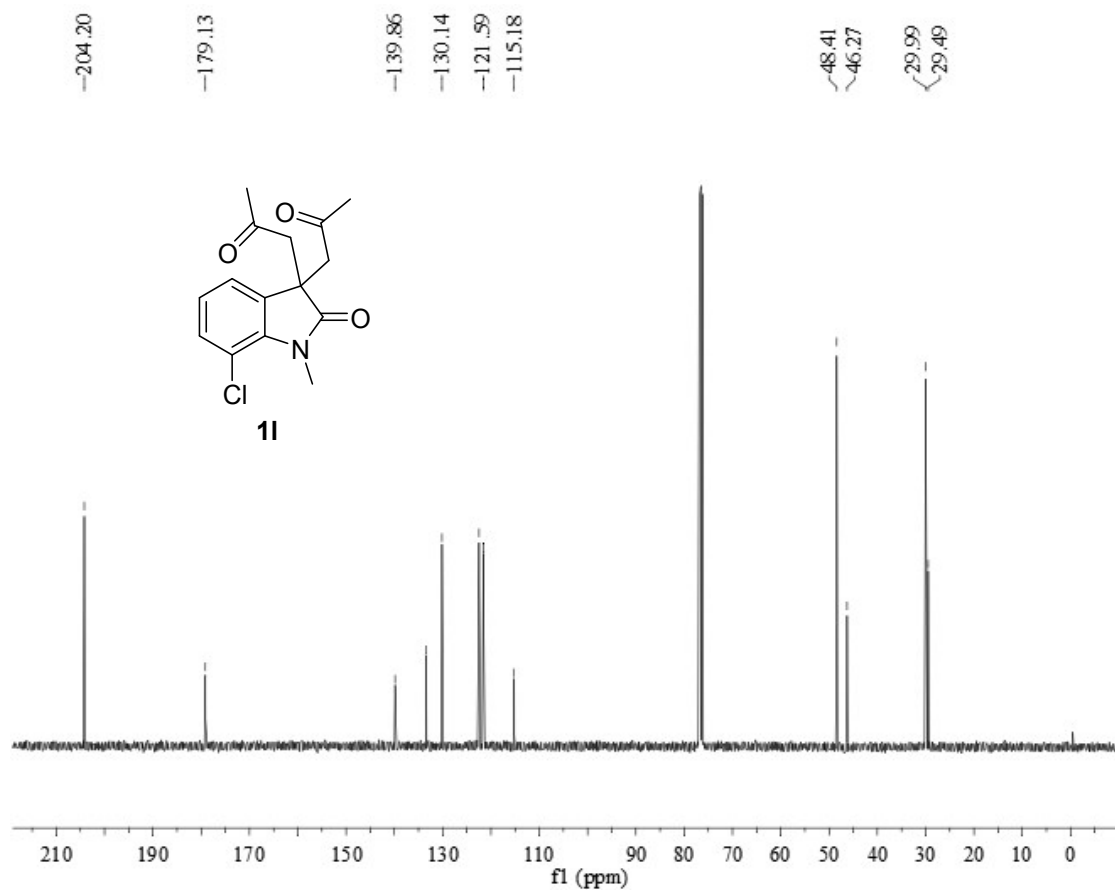

**1,1'-(7-fluoro-1-methyl-2-oxindoline-3,3-diyl)bis(propan-2-one) (1m)**

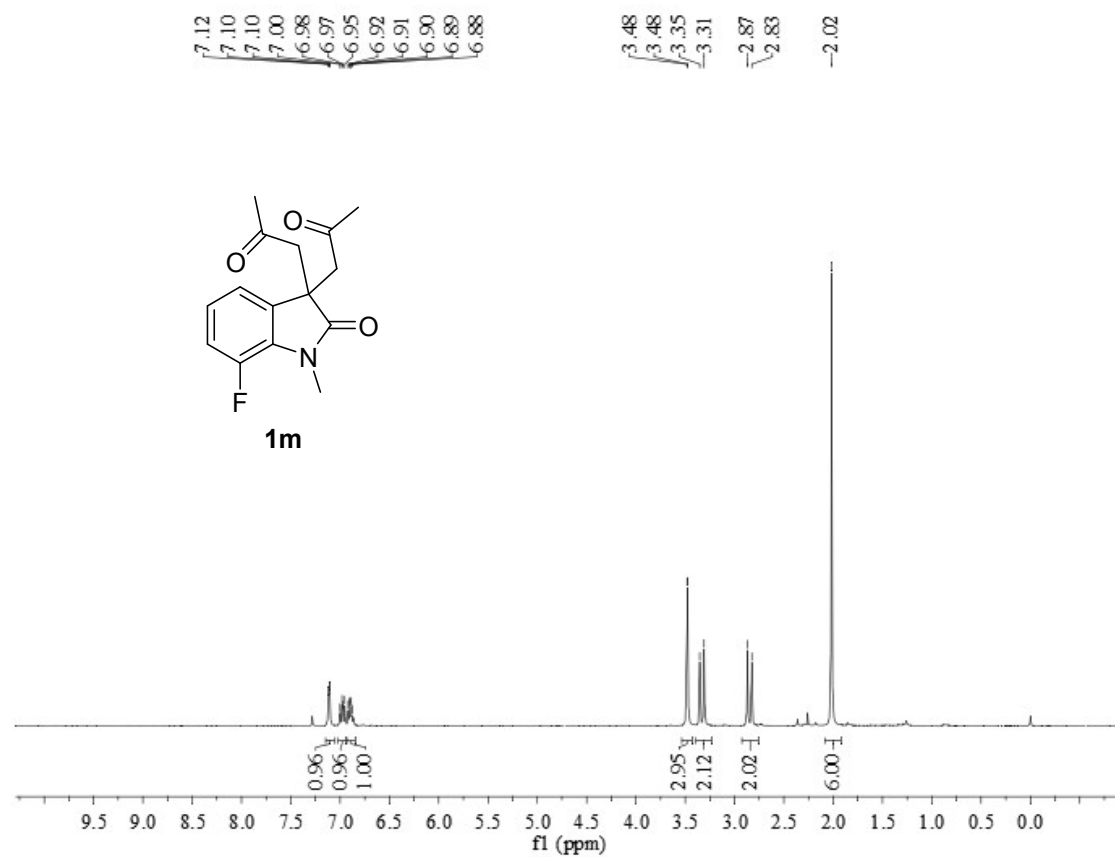

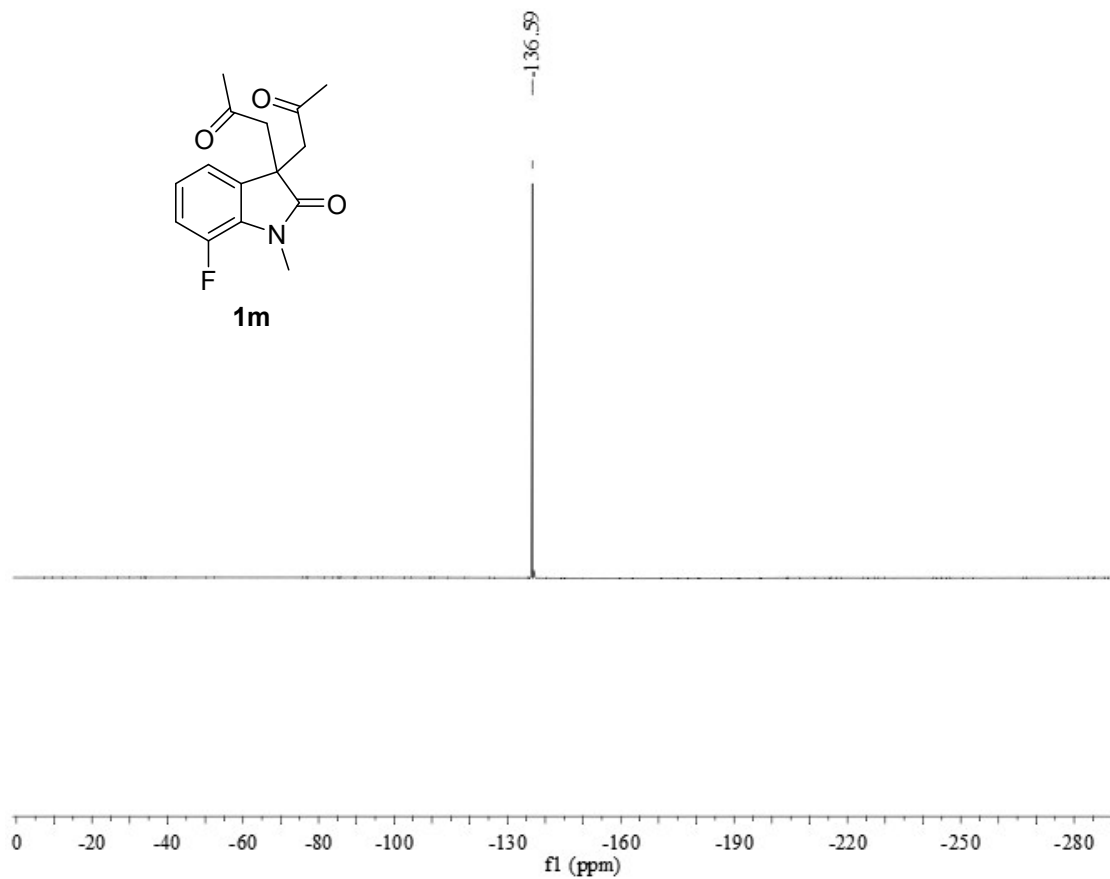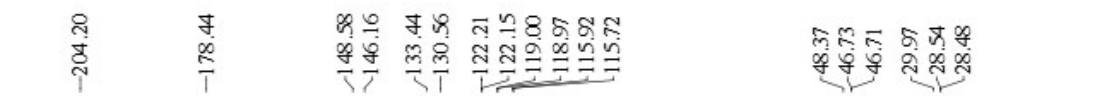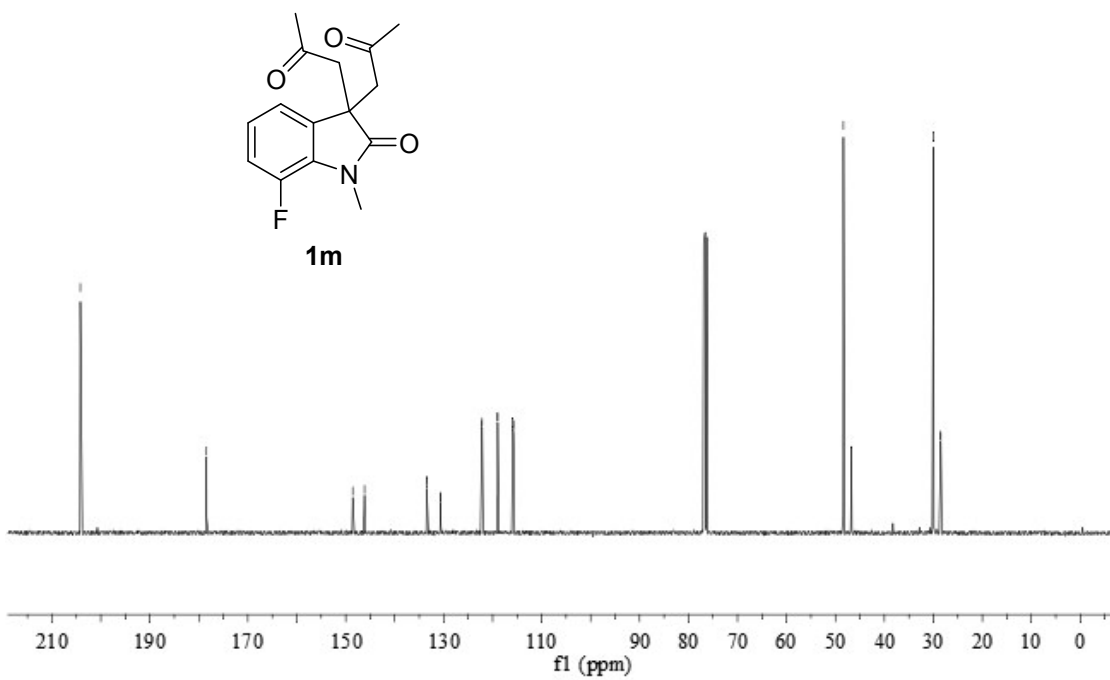

# 1,1'-(1,7-dimethyl-2-oxindoline-3,3-diyl)bis(propan-2-one) (1n)

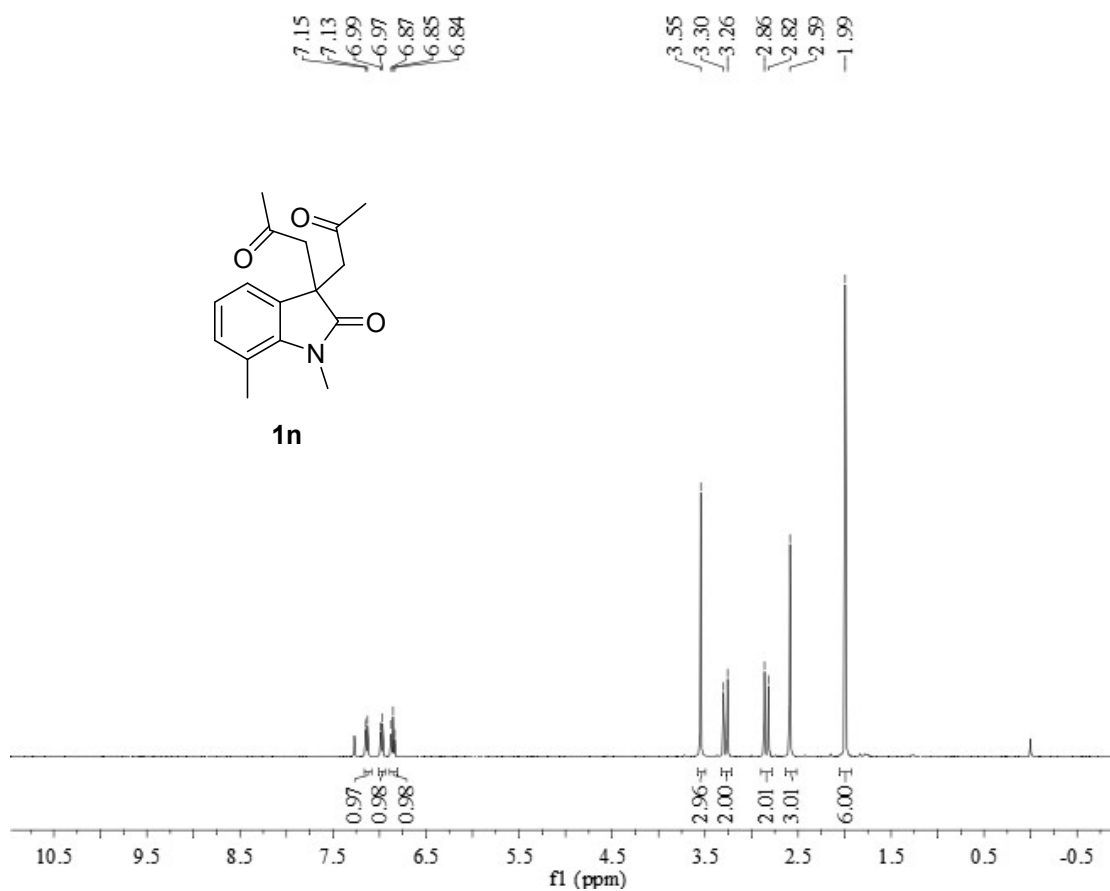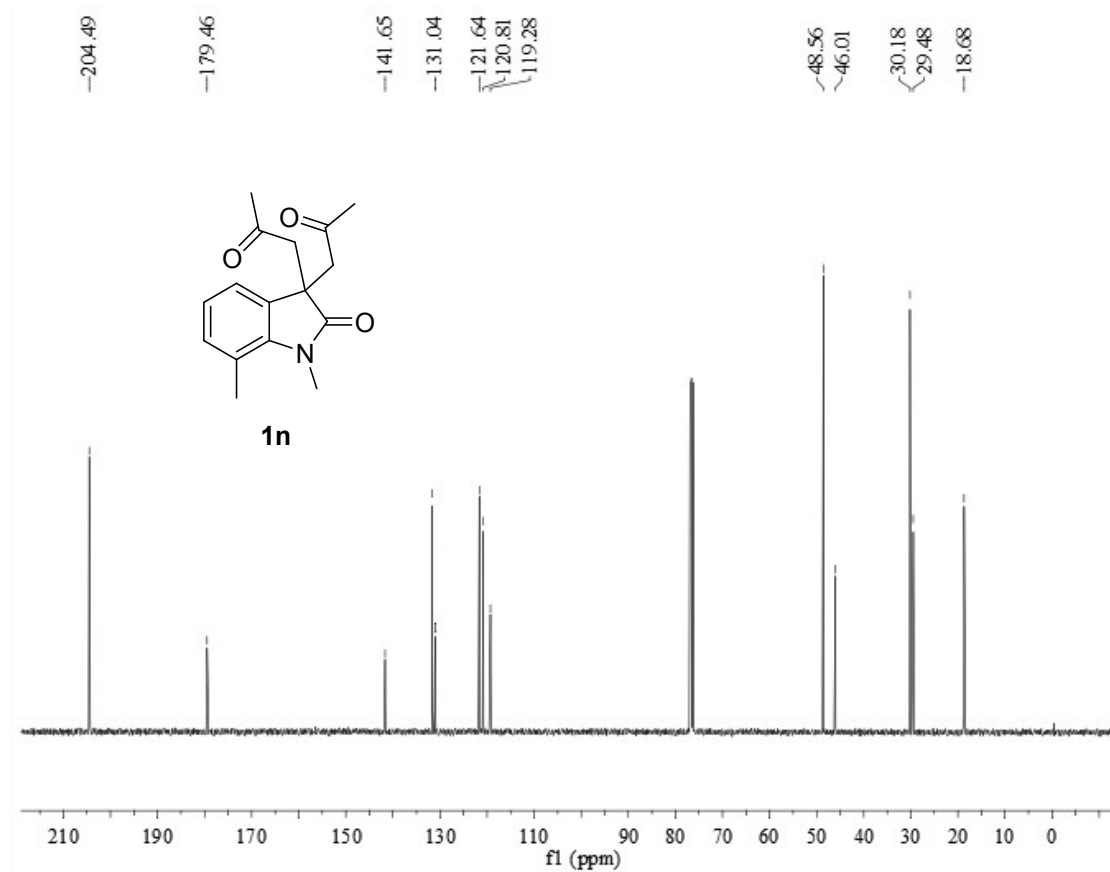

**1,1'-(2-oxo-1-phenylindoline-3,3-diyl)bis(propan-2-one) (1o)**

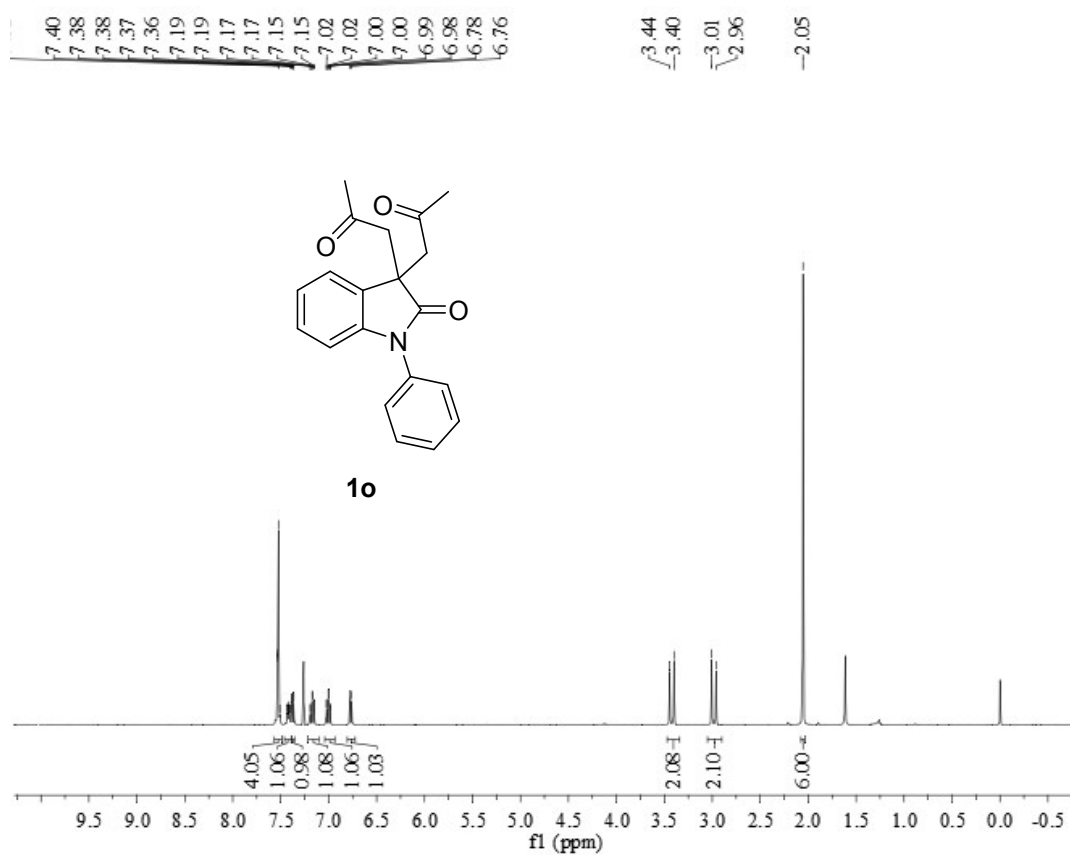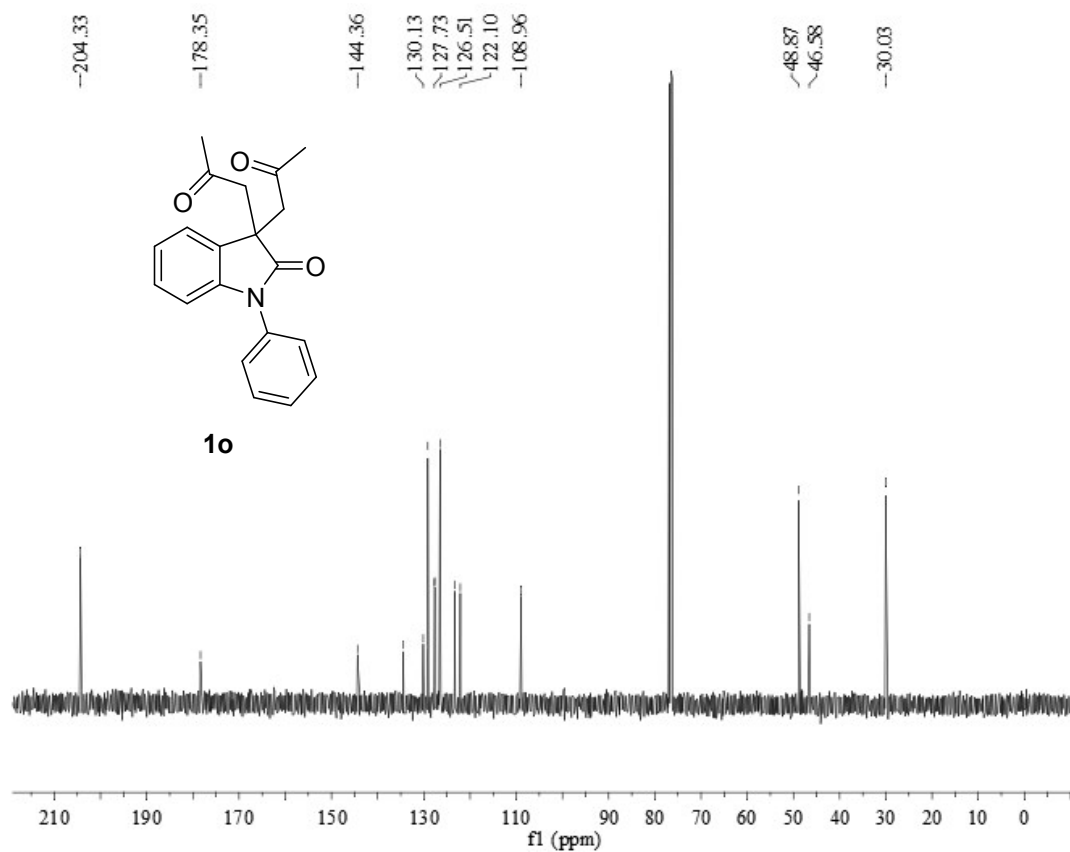

**1,1'-(1-benzyl-2-oxindoline-3,3-diyl)bis(propan-2-one) (1p)**

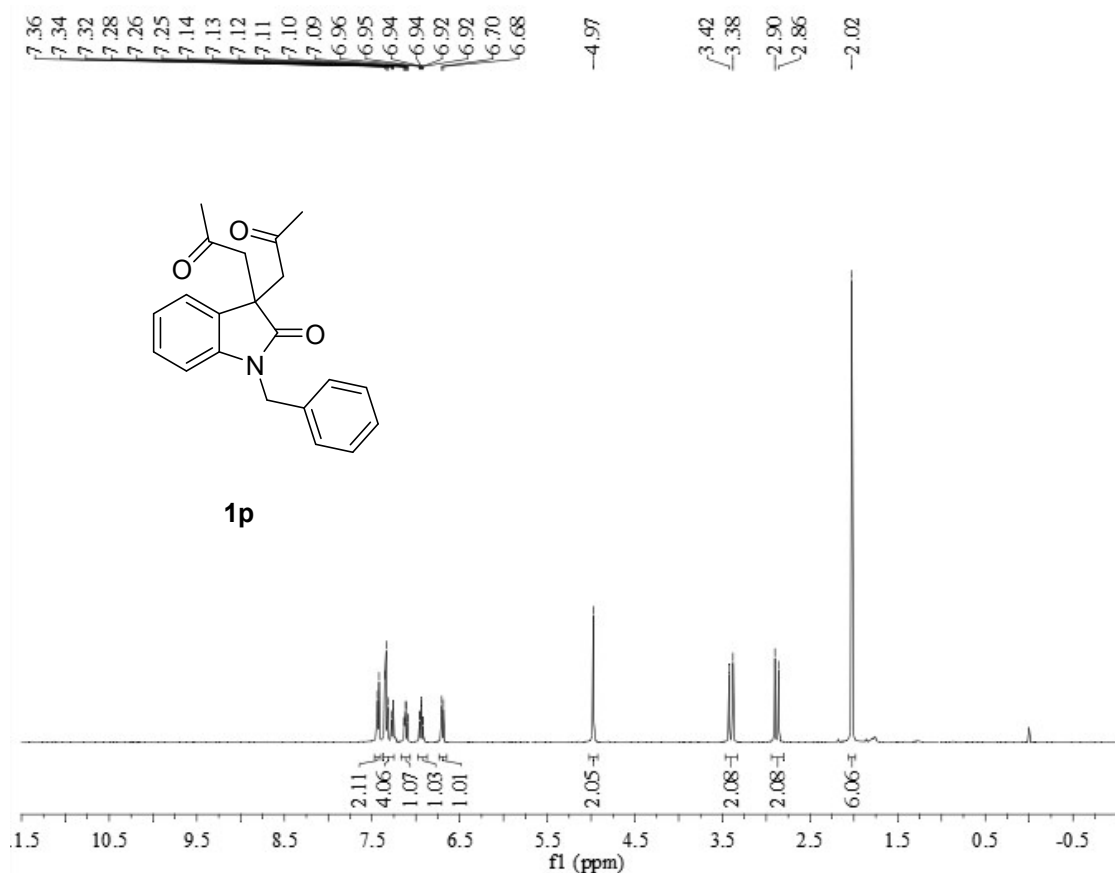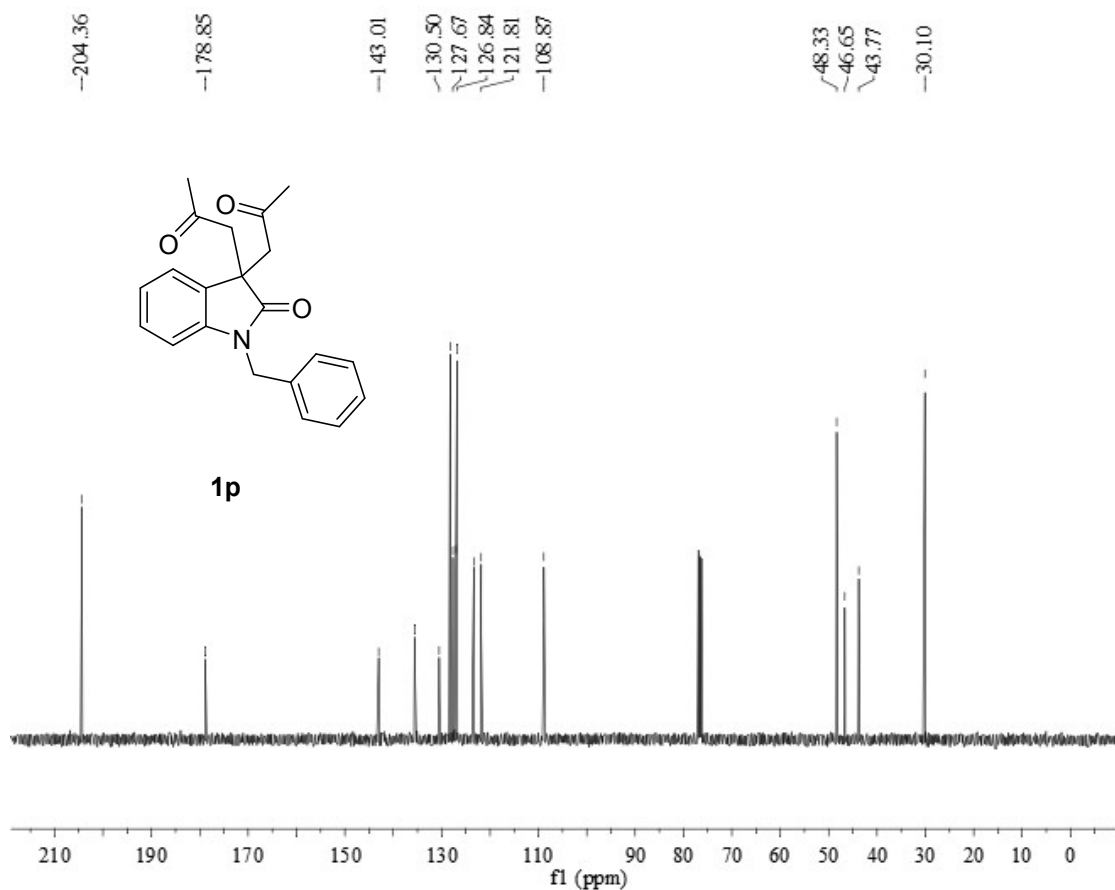



**(R)-1',3-dimethylspiro[cyclohexane-1,3'-indolin]-3-ene-2',5-dione (3a)**

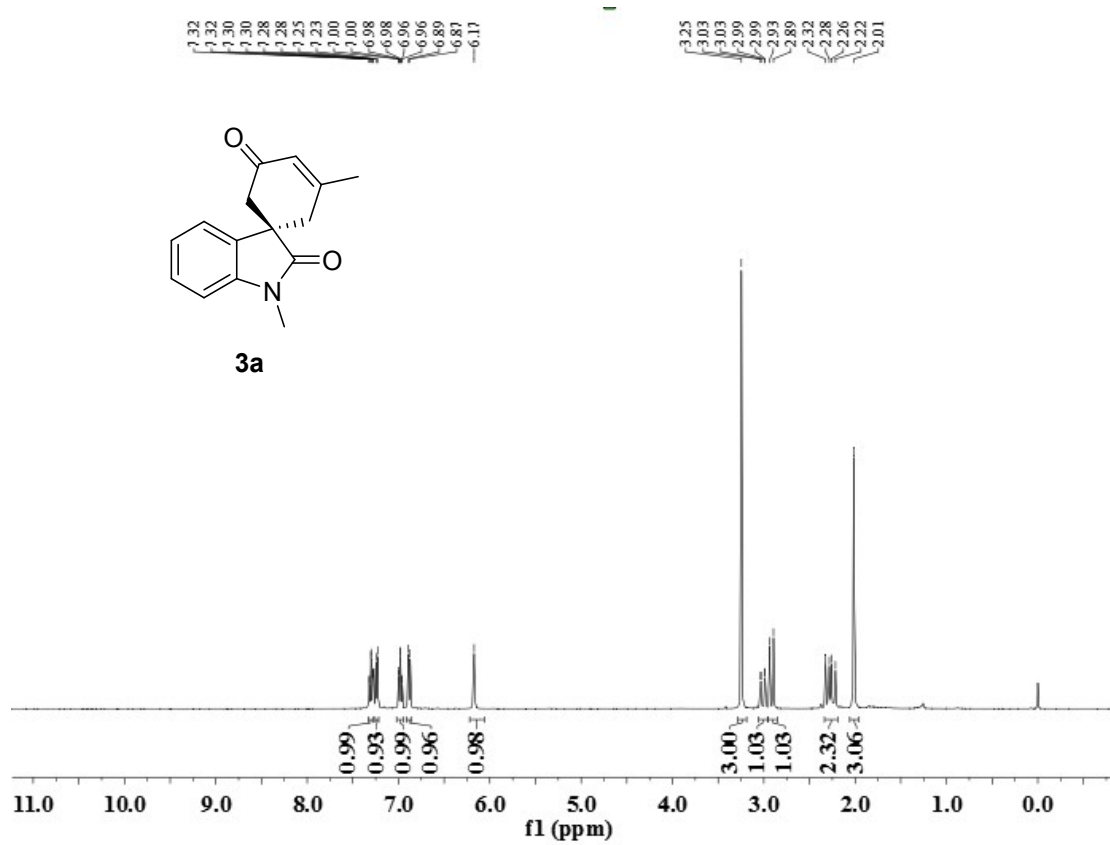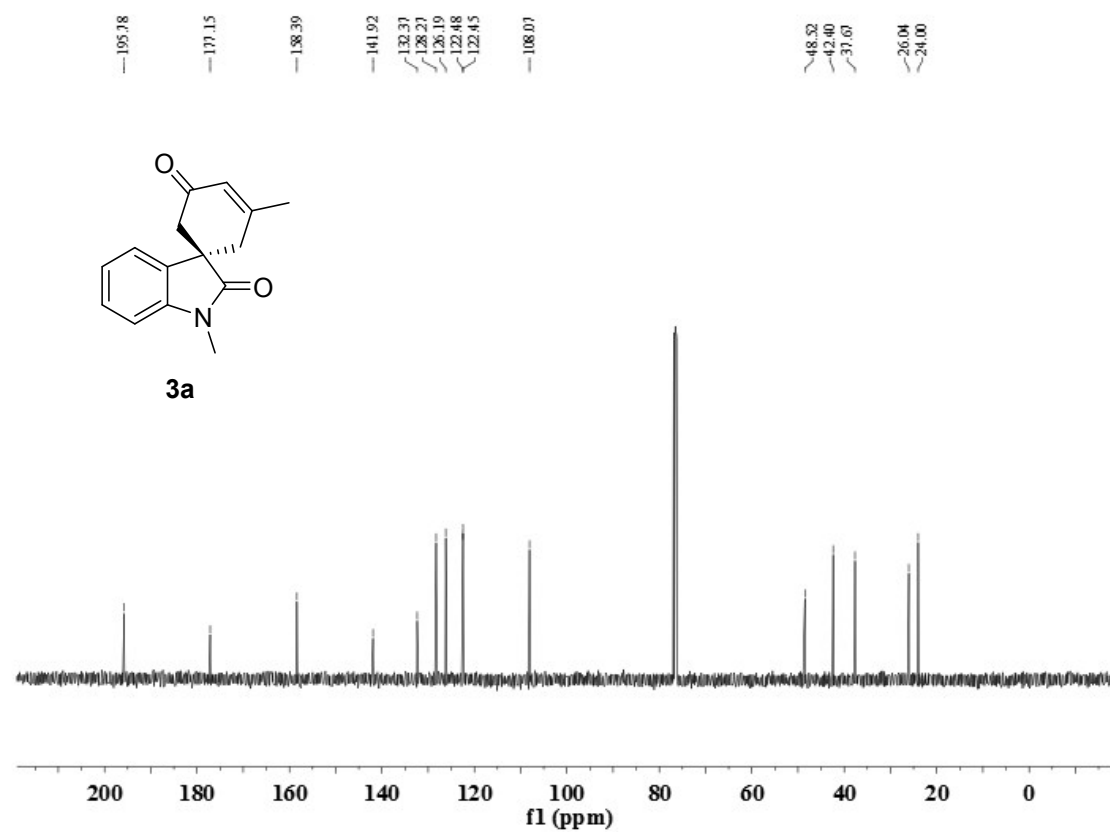

**(R)-1',3,5'-trimethylspiro[cyclohexane-1,3'-indolin]-3-ene-2',5-dione (3b)**

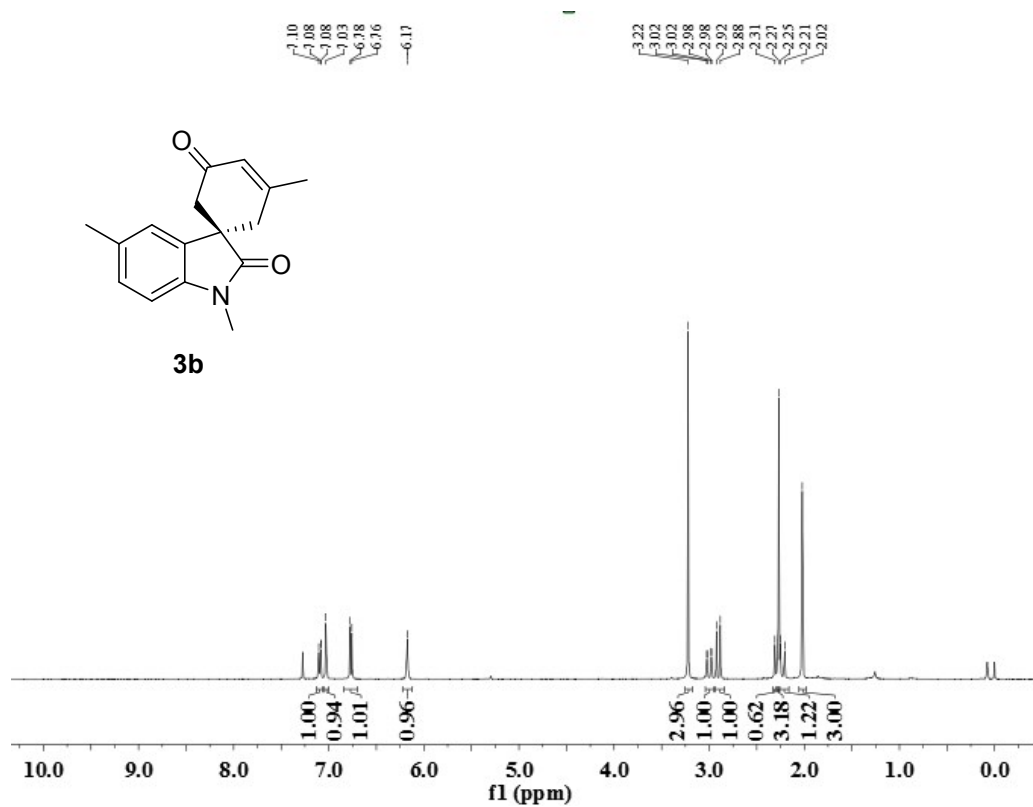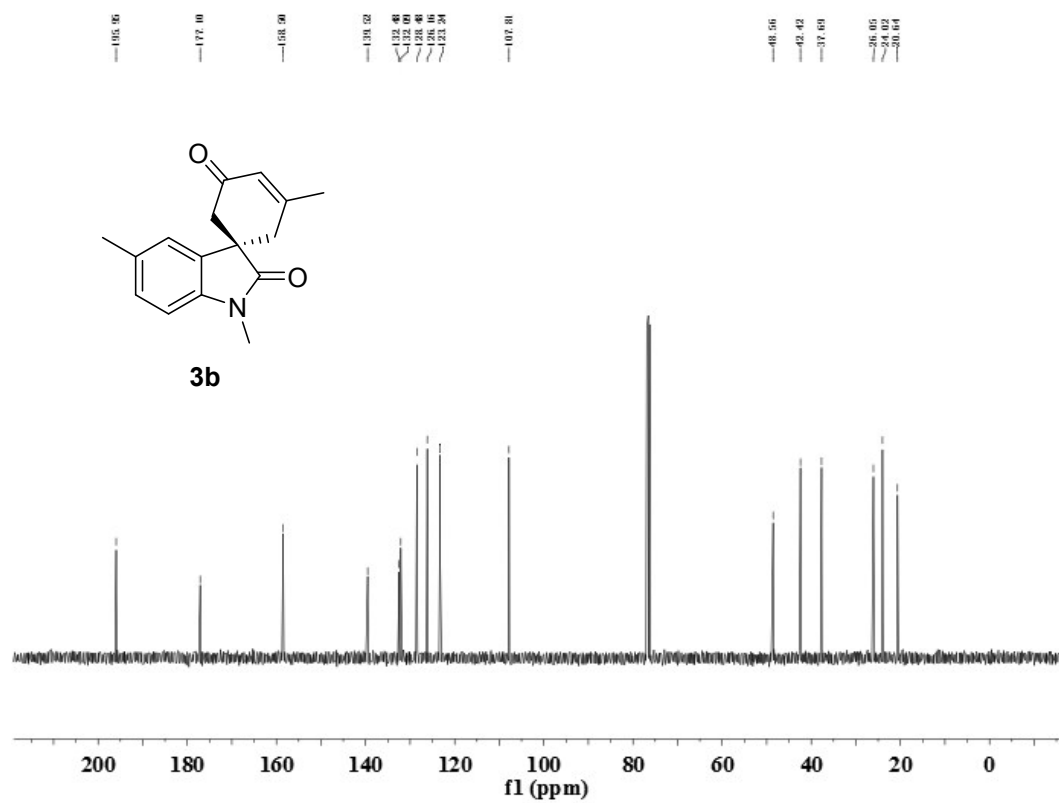

**(R)-5'-methoxy-1',3-dimethylspiro[cyclohexane-1,3'-indolin]-3-ene-2',5-dione (3c)**

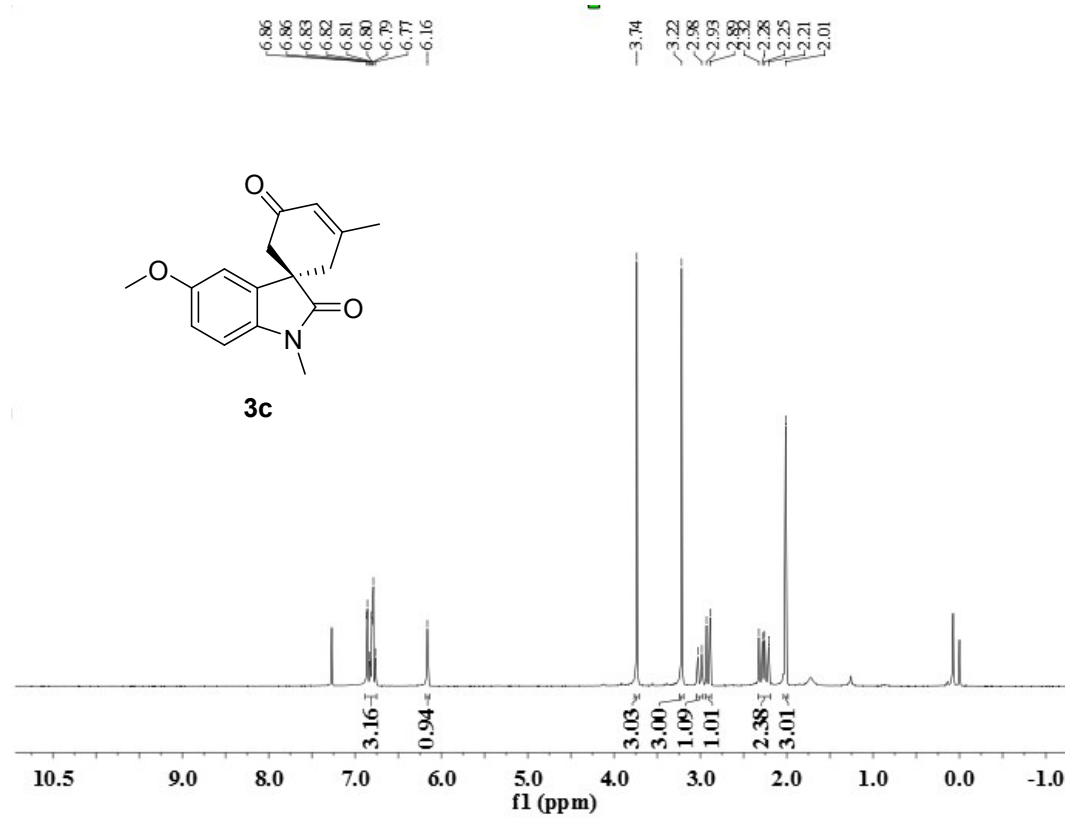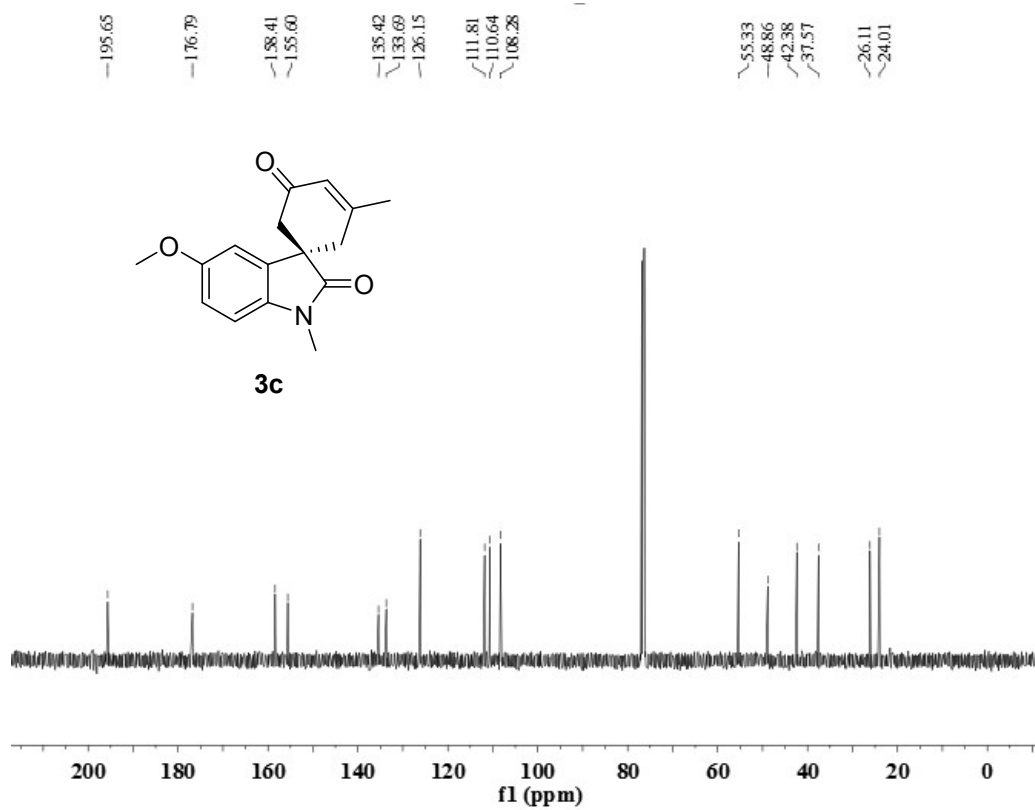

**(R)-1',3,5',7'-tetramethylspiro[cyclohexane-1,3'-indolin]-3-ene-2',5-dione (3d)**

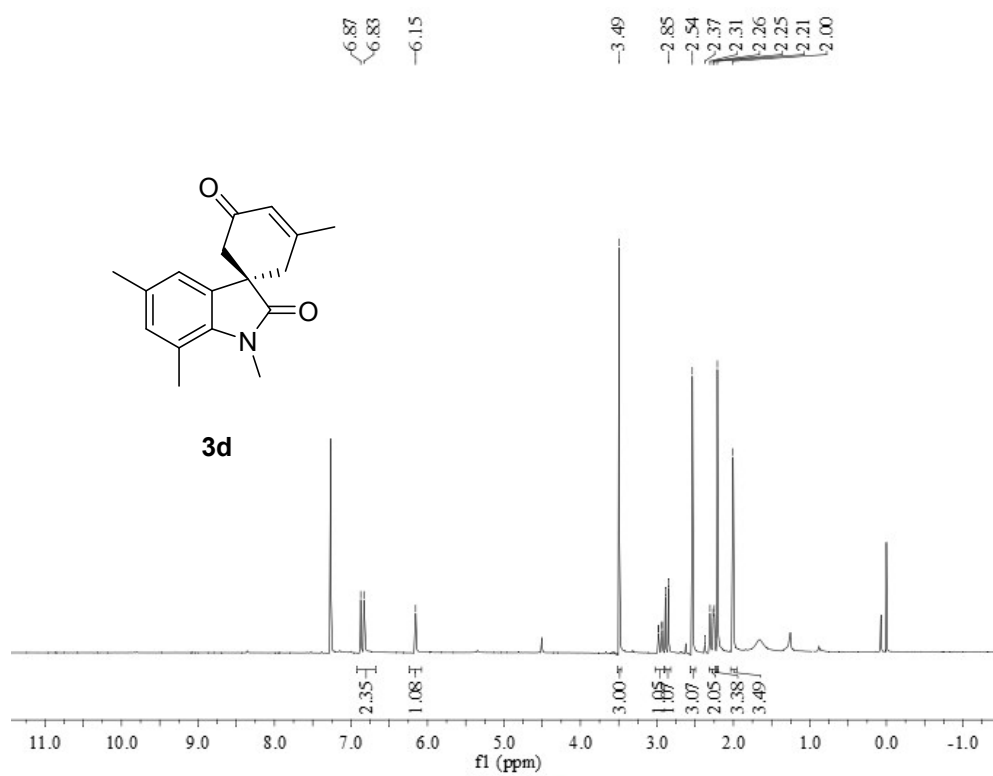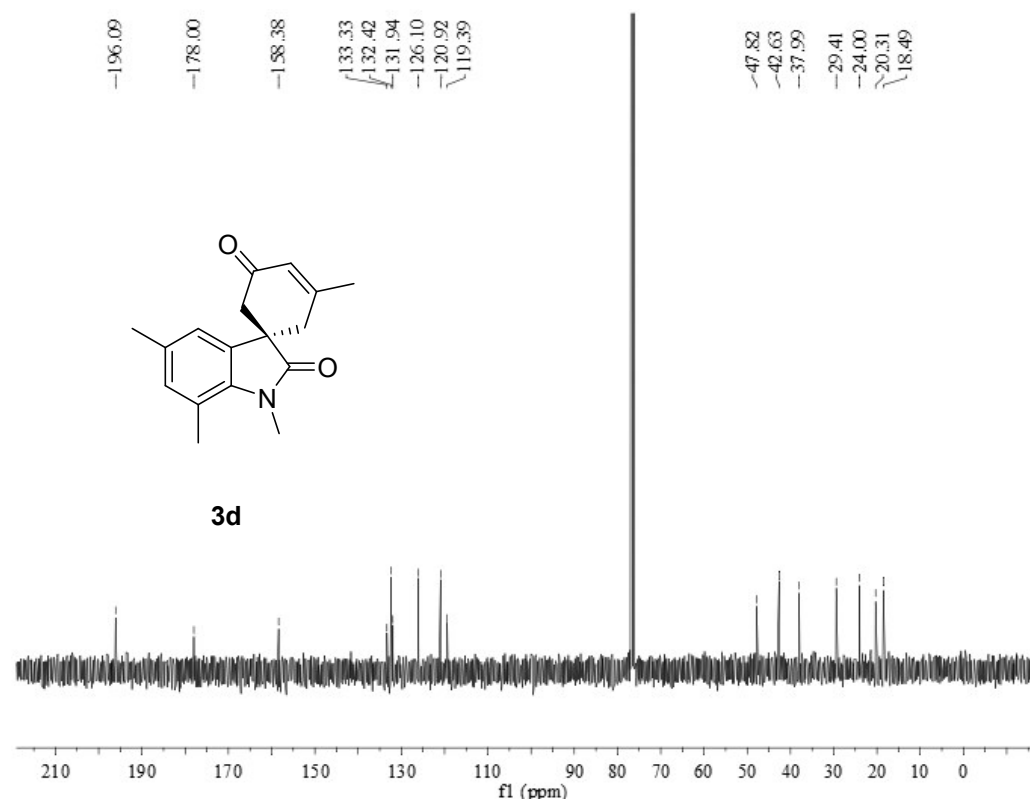

**(R)-5'-fluoro-1',3-dimethylspiro[cyclohexane-1,3'-indolin]-3-ene-2',5-dione (3e)**

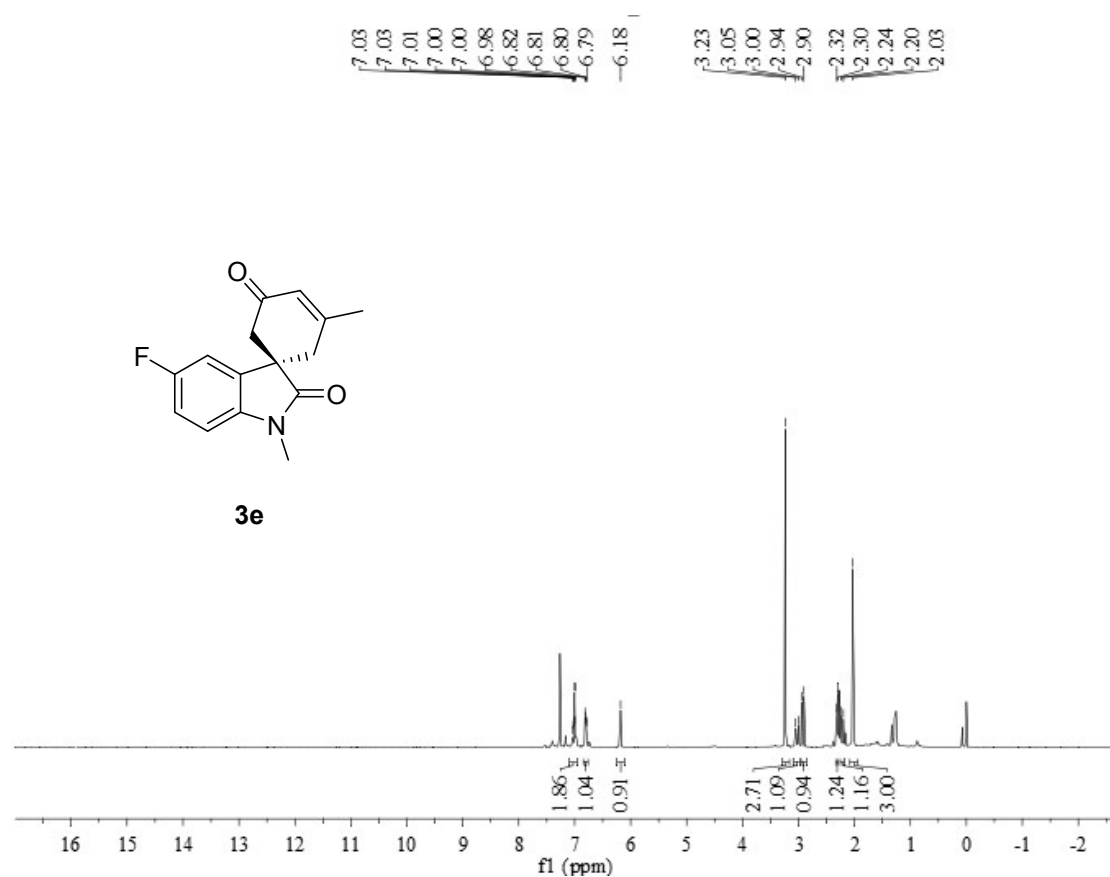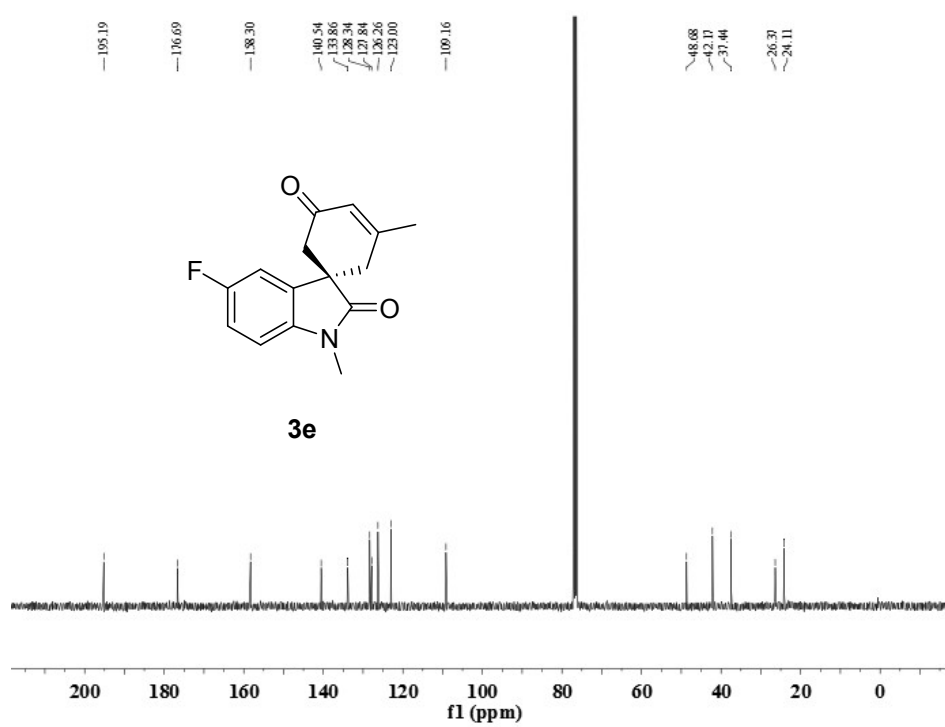

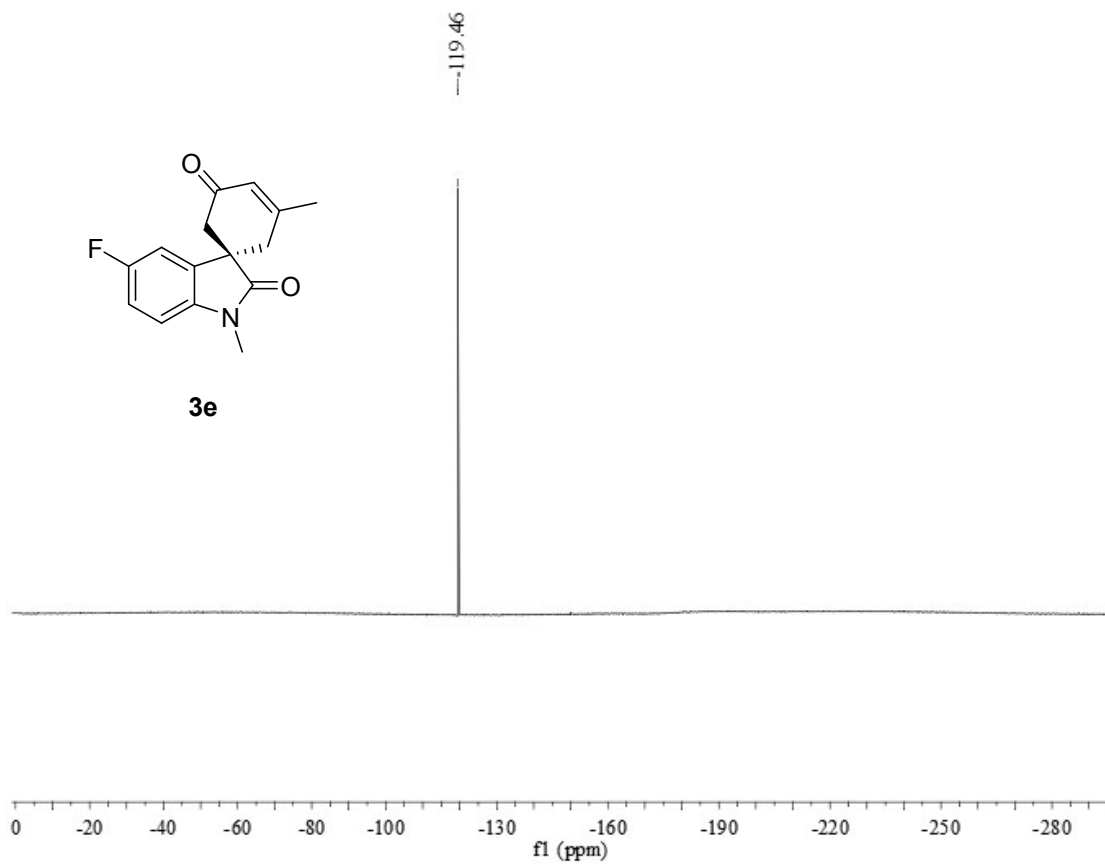

**(R)-5'-chloro-1',3-dimethylspiro[cyclohexane-1,3'-indolin]-3-ene-2',5-dione (3f)**

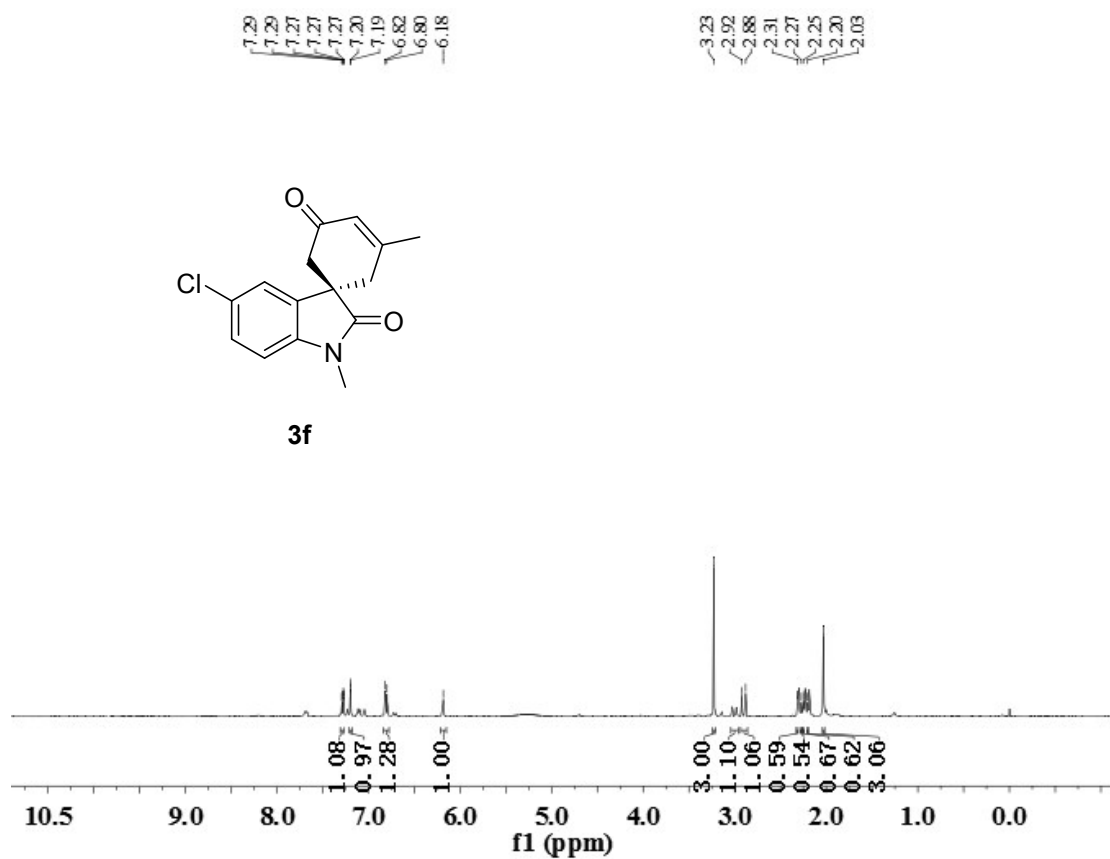

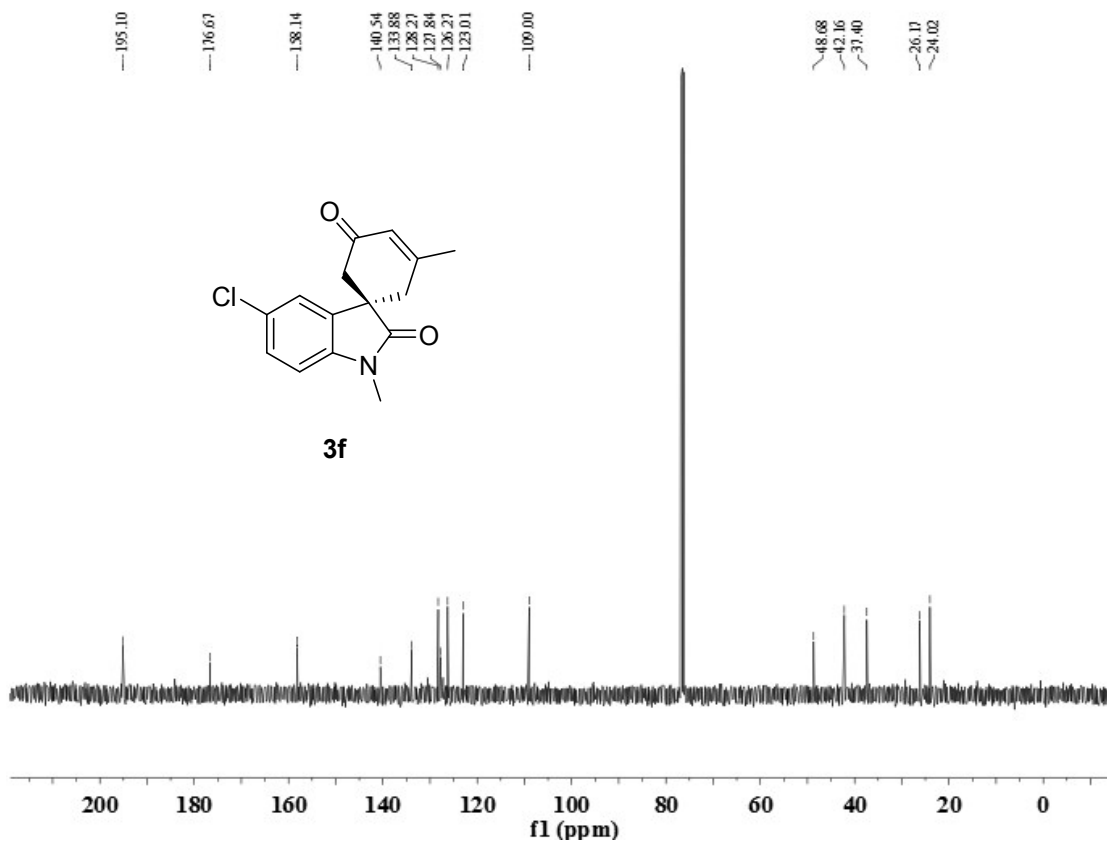

**(R)-5'-bromo-1',3-dimethylspiro[cyclohexane-1,3'-indolin]-3-ene-2',5-dione (3g)**

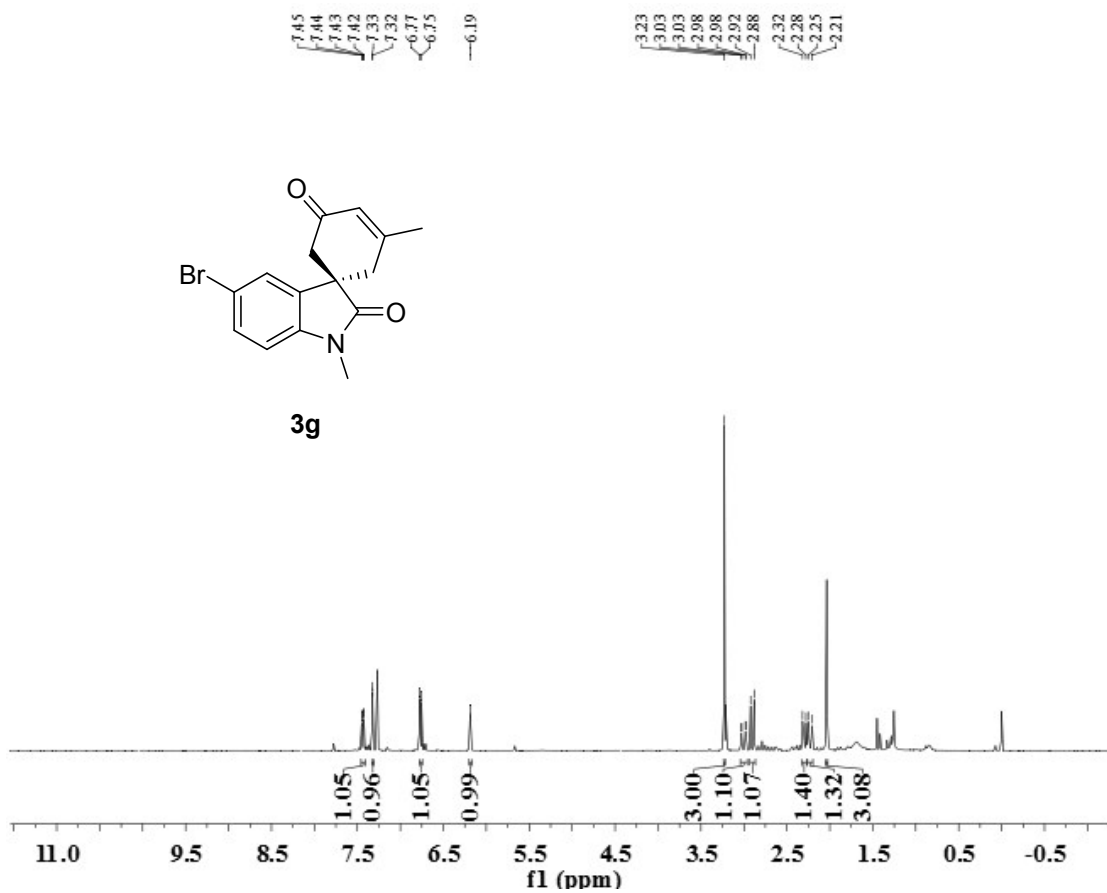

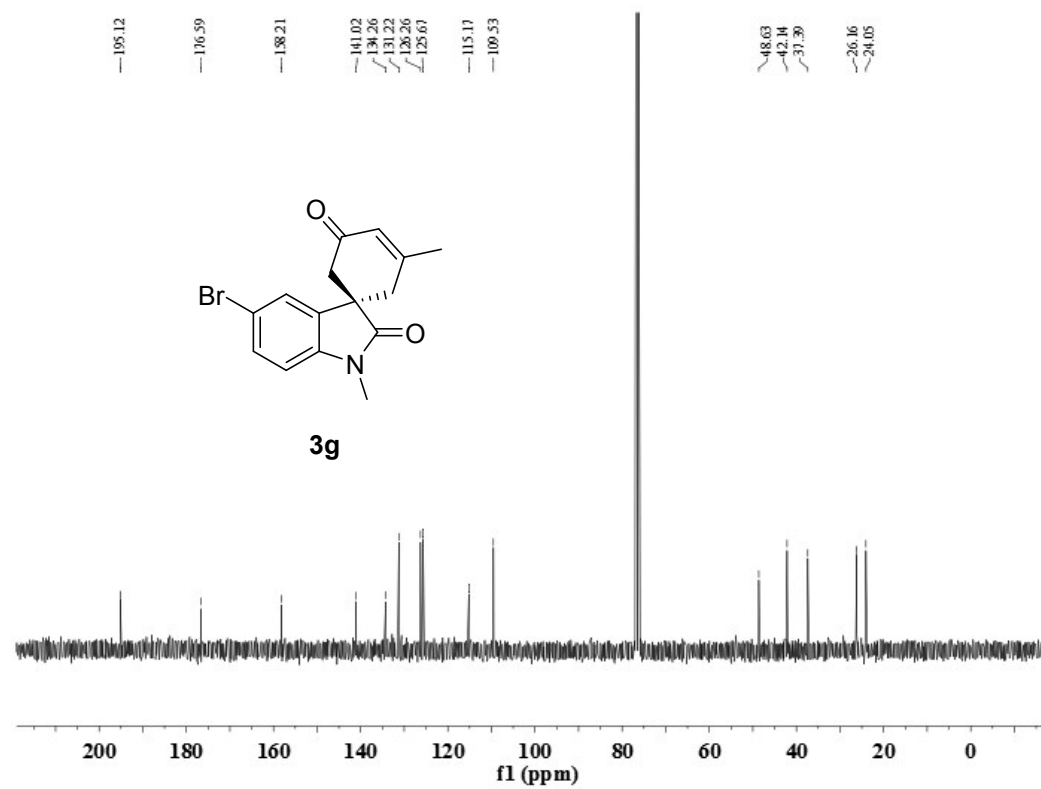

**(R)-4'-chloro-1',3-dimethylspiro[cyclohexane-1,3'-indolin]-3-ene-2',5-dione (3h)**

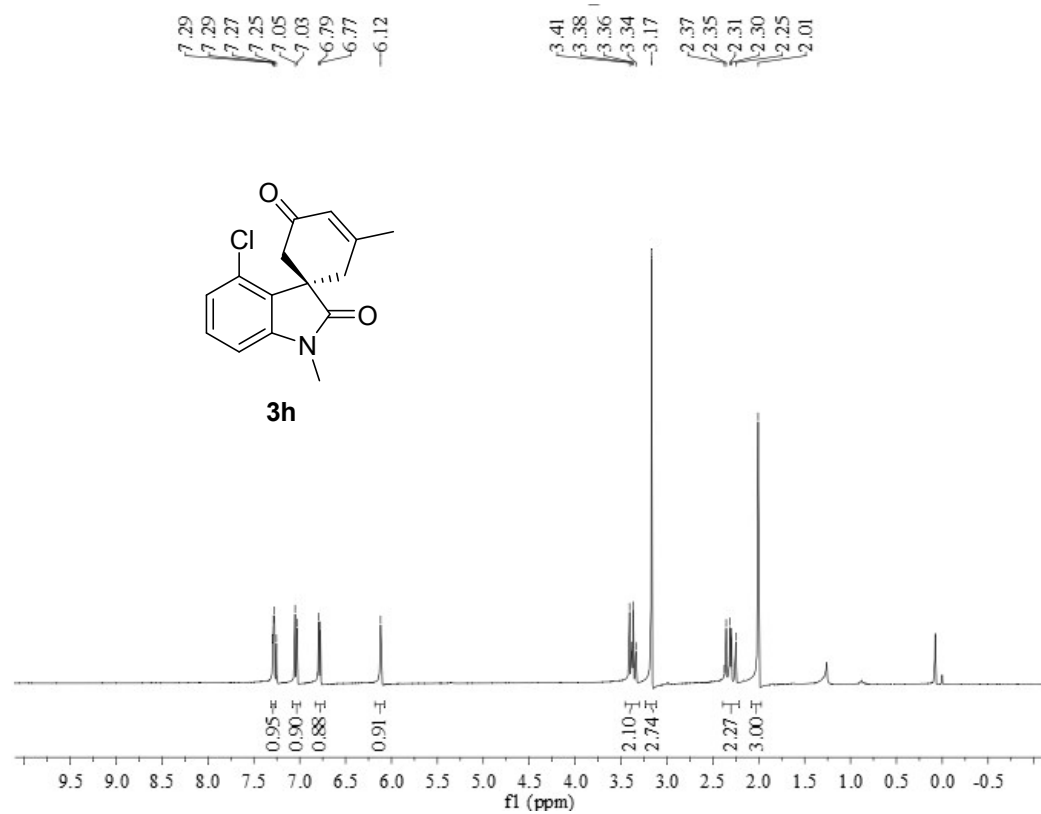



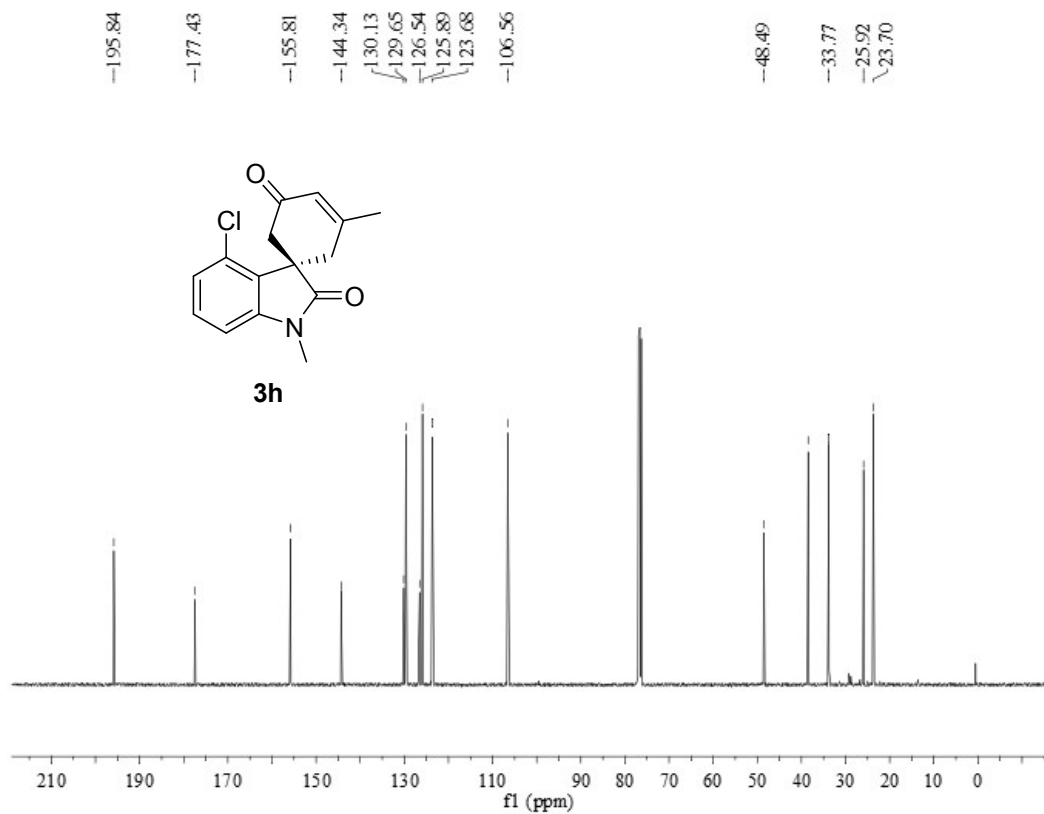

**(R)-4'-bromo-1',3-dimethylspiro[cyclohexane-1,3'-indolin]-3-ene-2',5-dione (3i)**

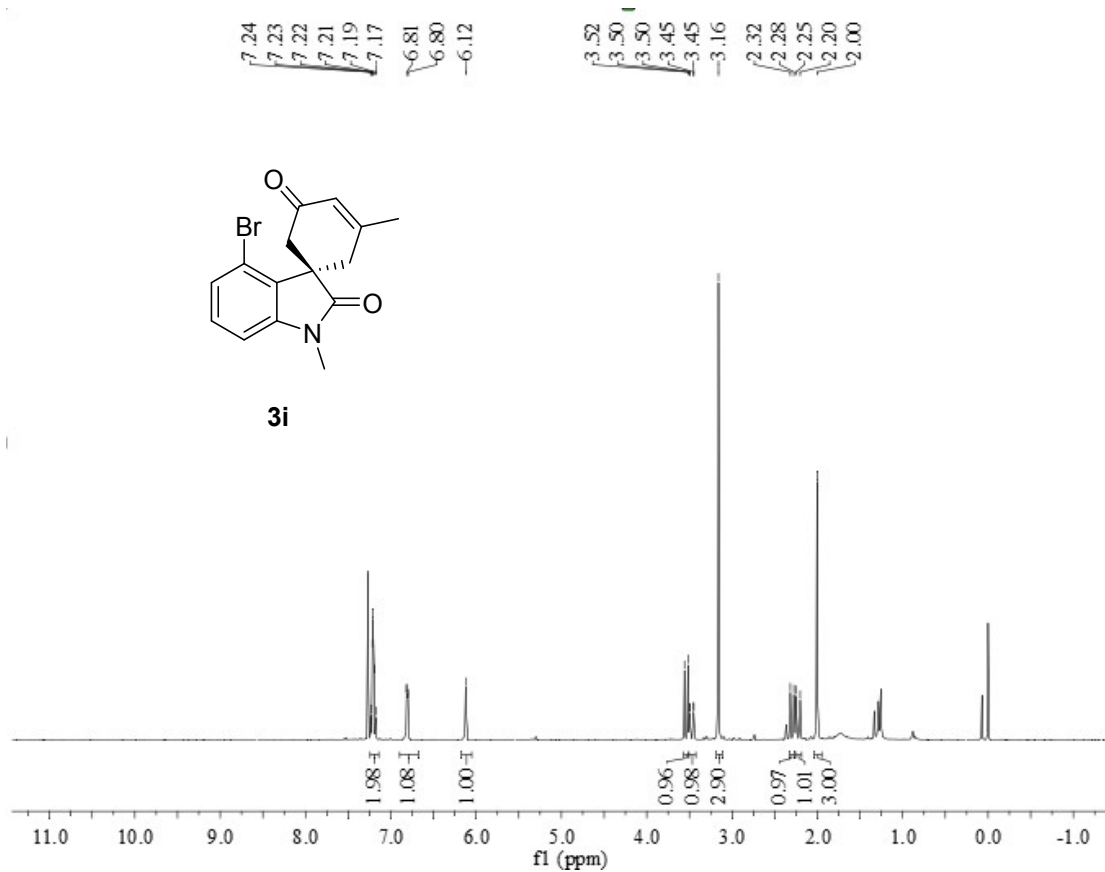

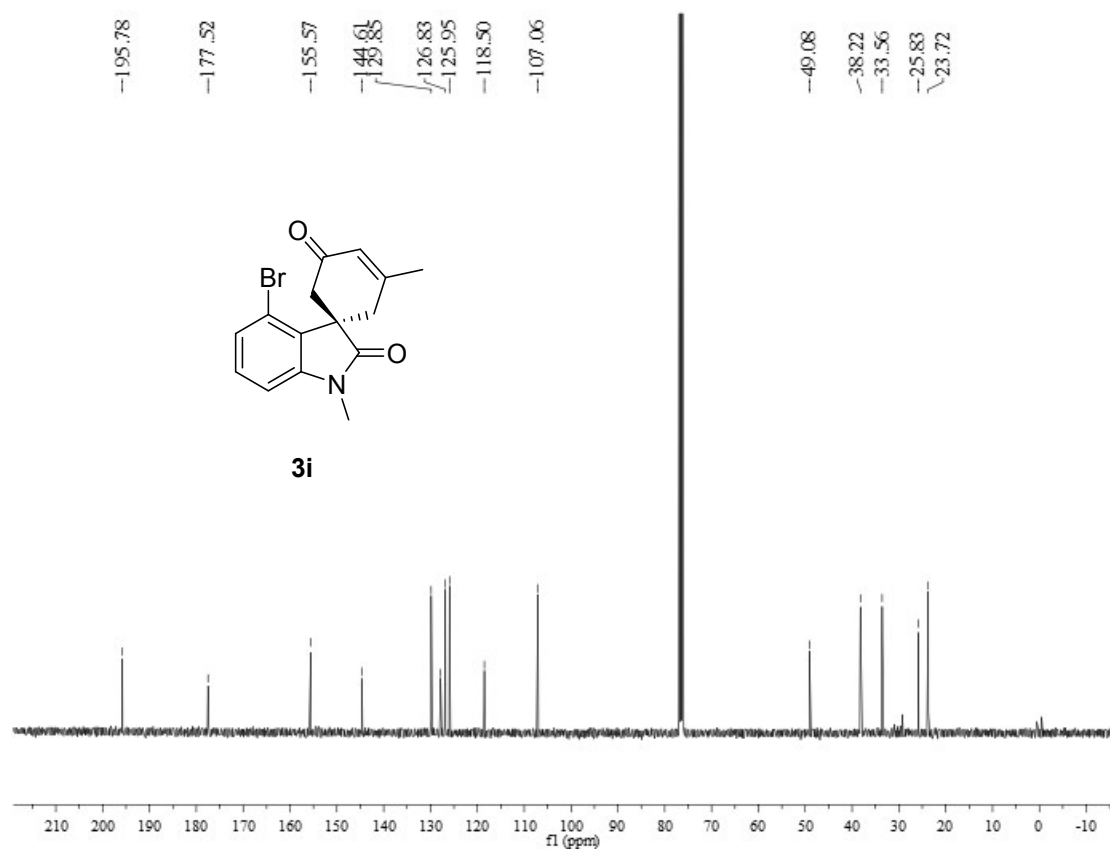

**(R)-6'-bromo-1',3-dimethylspiro[cyclohexane-1,3'-indolin]-3-ene-2',5-dione (3j)**

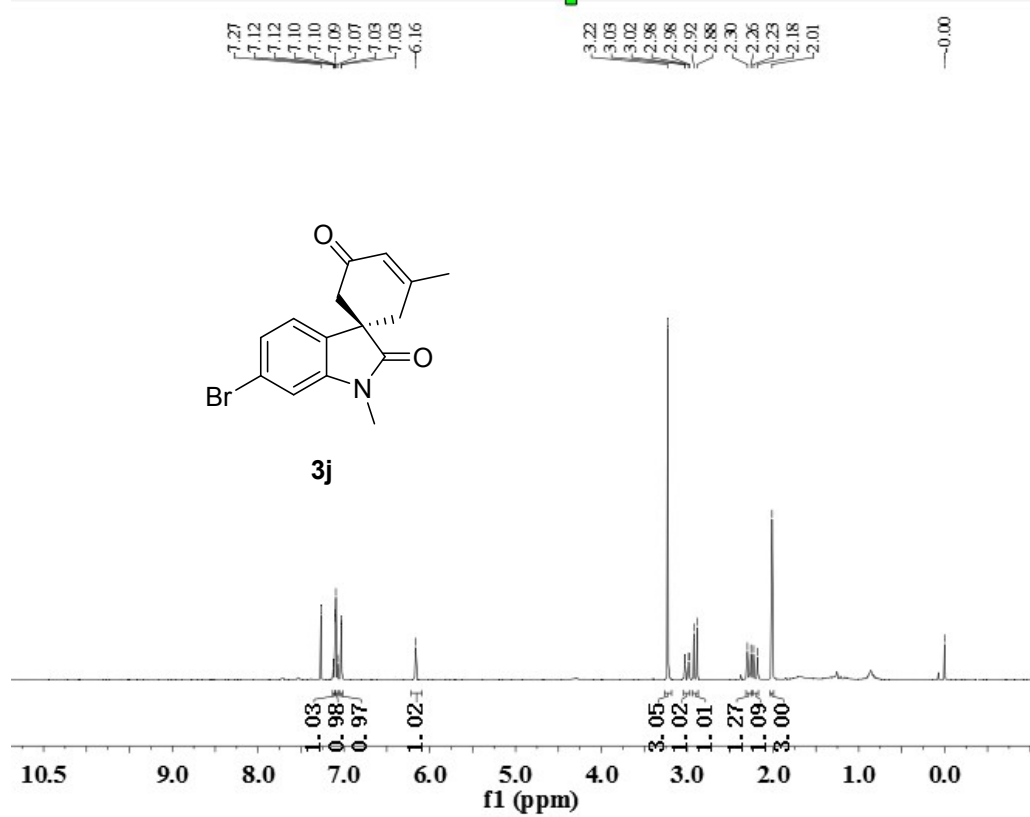

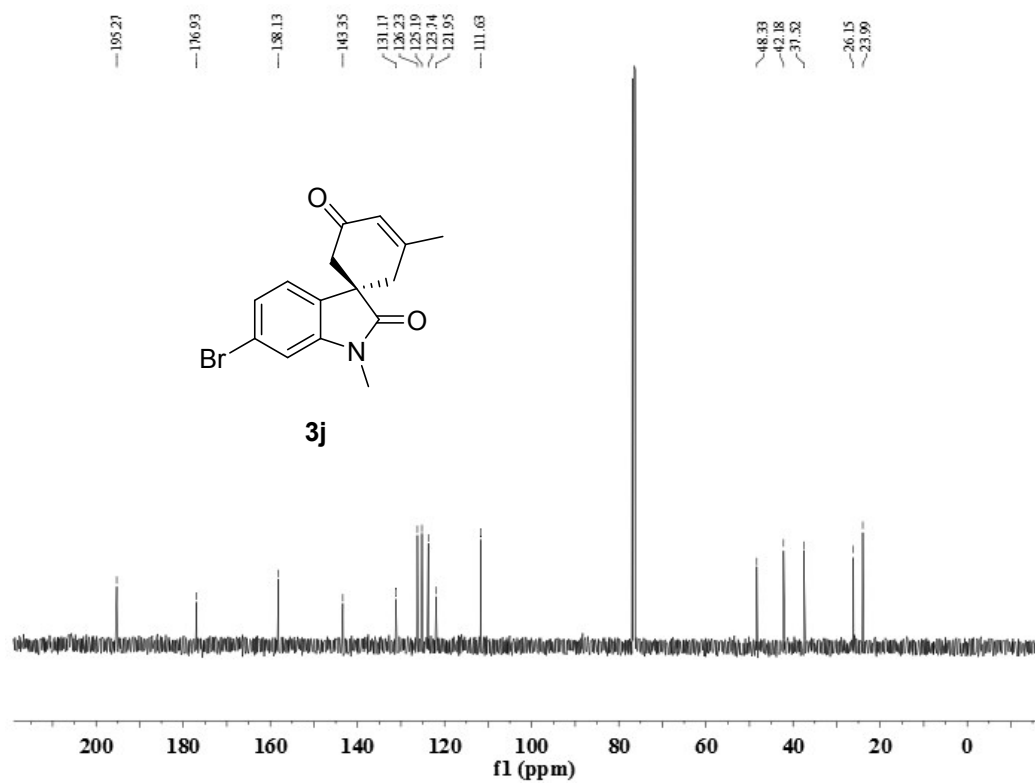

**(R)-6'-chloro-1',3-dimethylspiro[cyclohexane-1,3'-indolin]-3-ene-2',5-dione (3k)**

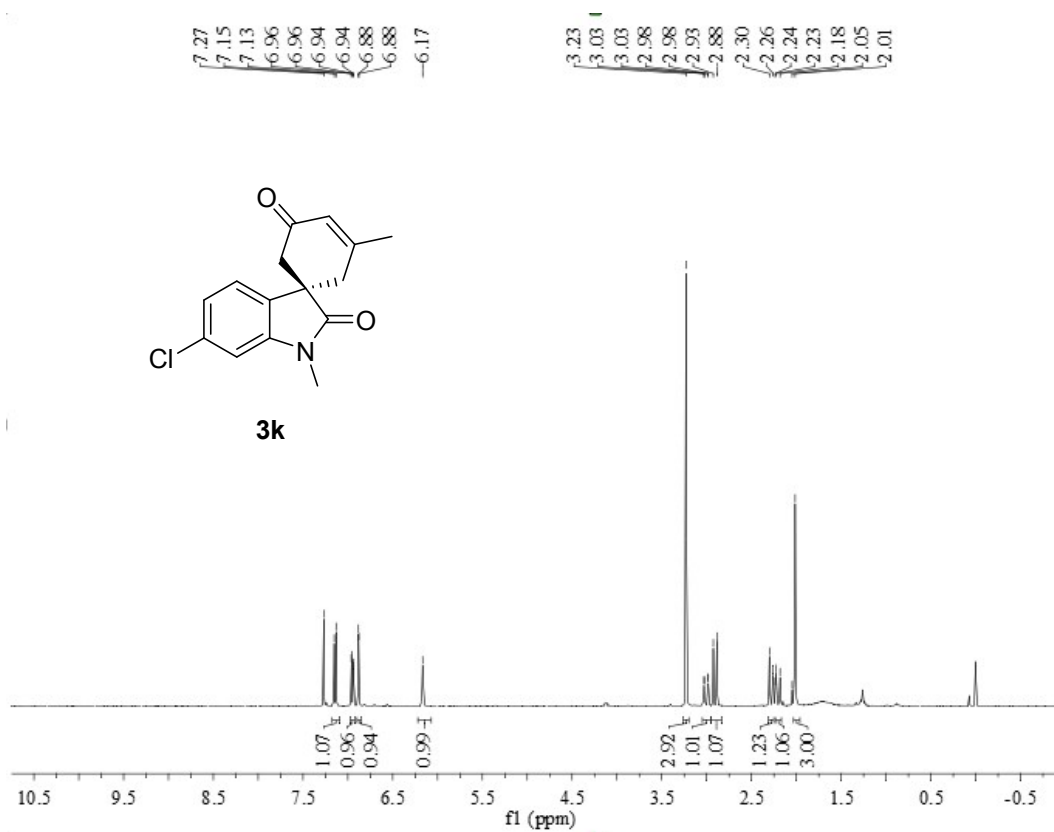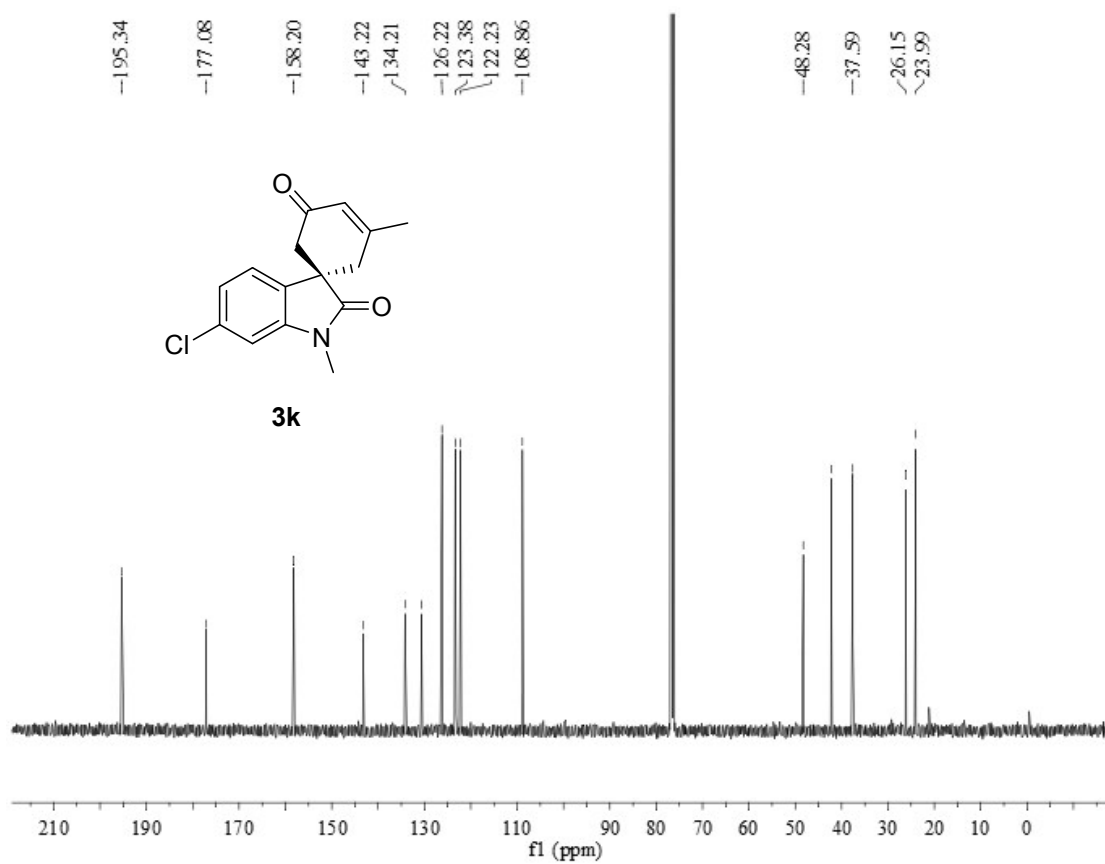

**(R)-7'-chloro-1',3-dimethylspiro[cyclohexane-1,3'-indolin]-3-ene-2',5-dione (3l)**

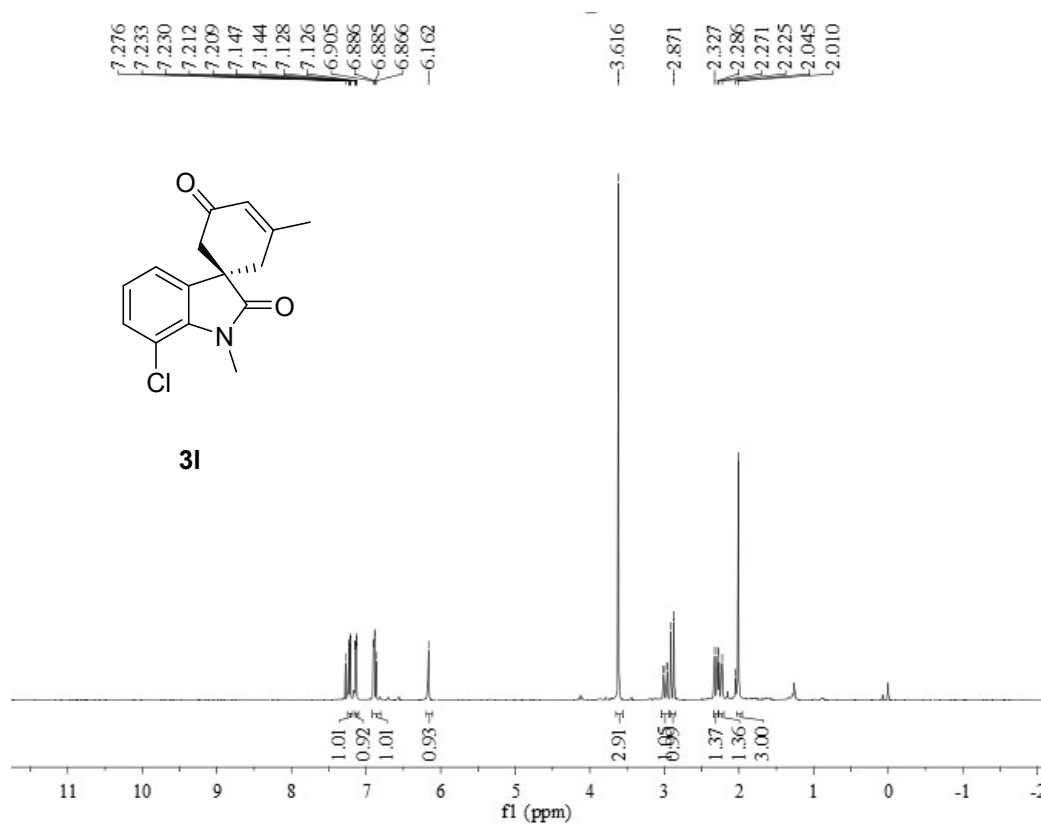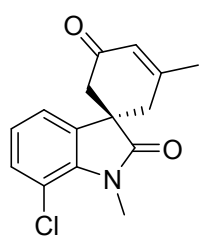

**31**

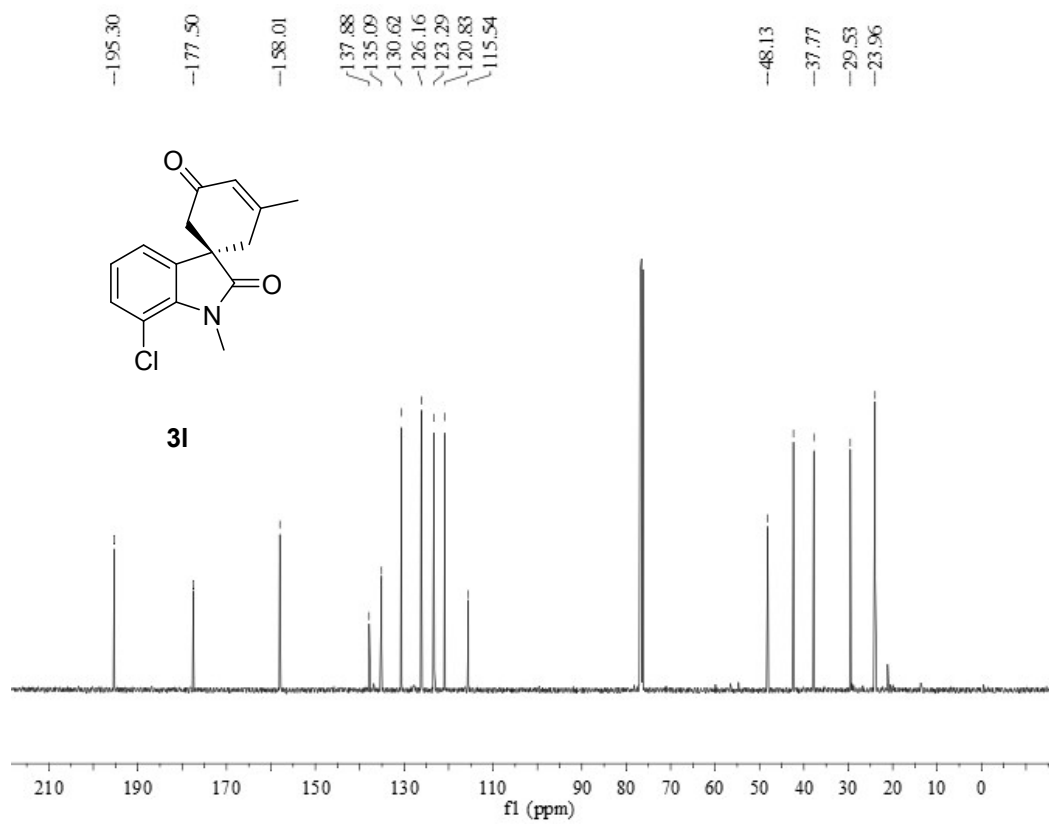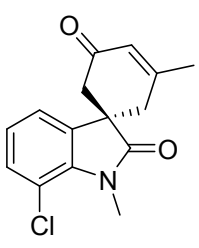

**31**

**(R)-7'-fluoro-1',3-dimethylspiro[cyclohexane-1,3'-indolin]-3-ene-2',5-dione (3m)**

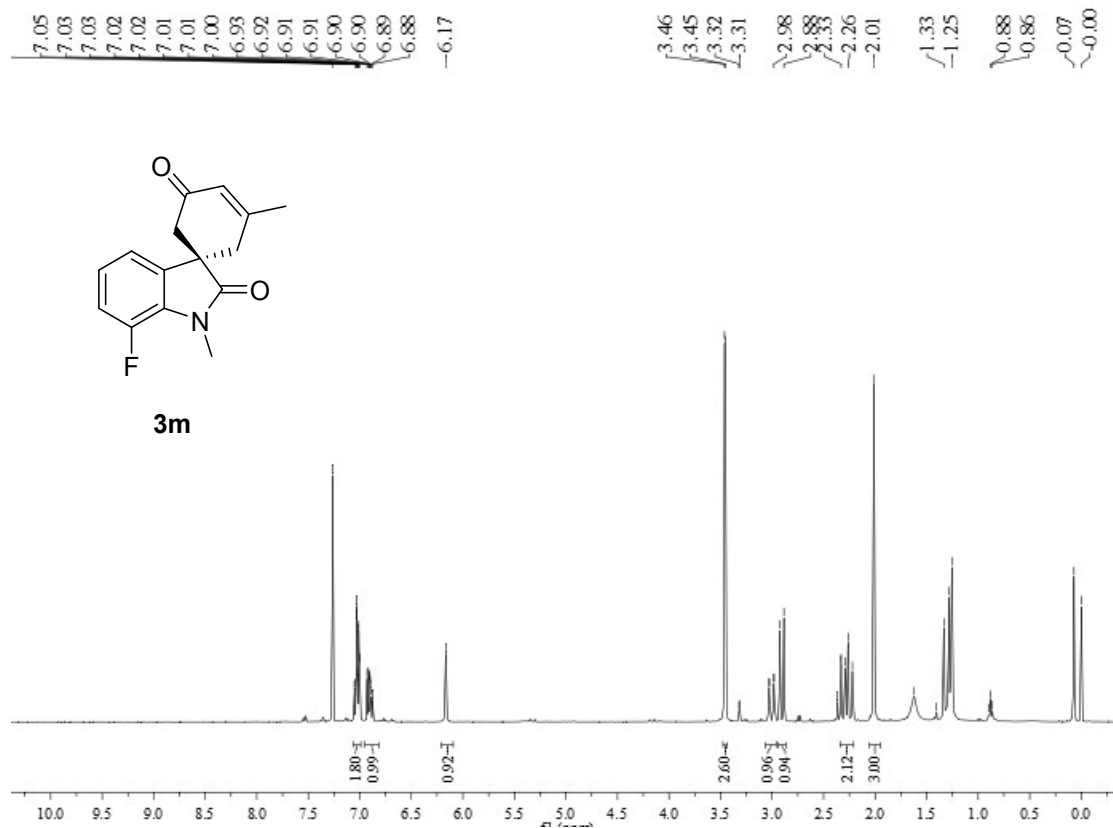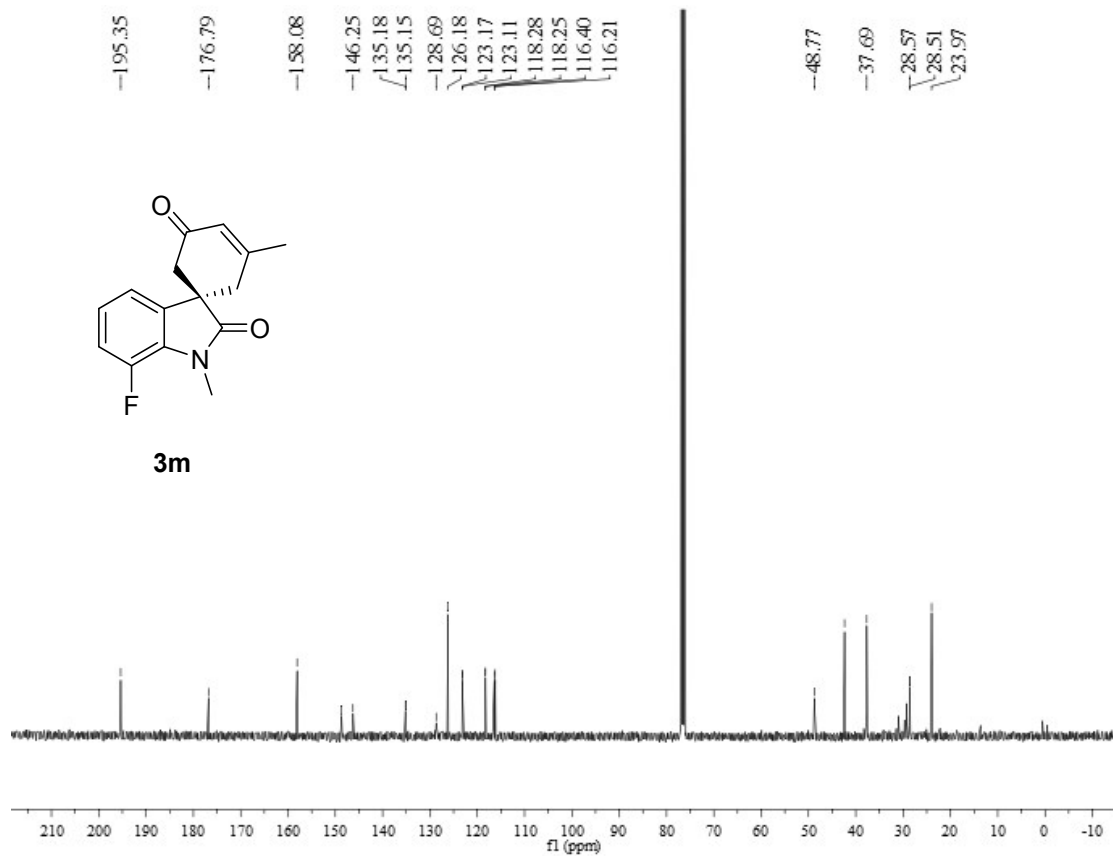

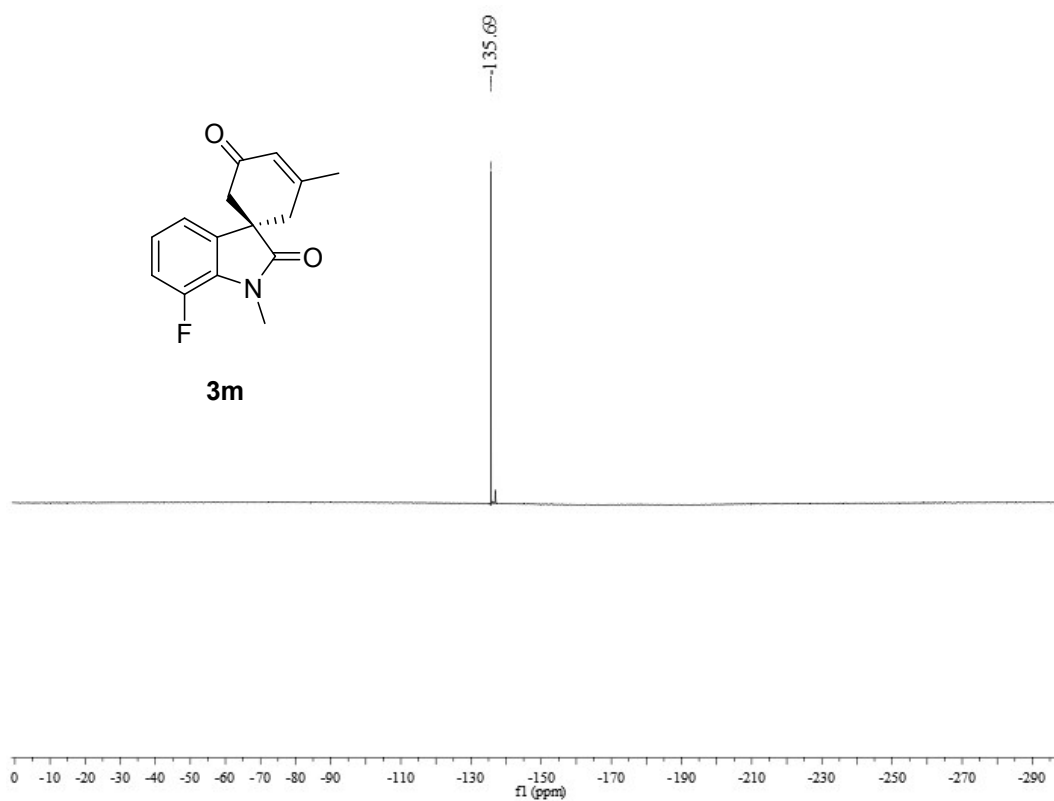

**(R)-1',3,7'-trimethylspiro[cyclohexane-1,3'-indolin]-3-ene-2',5-dione (3n)**

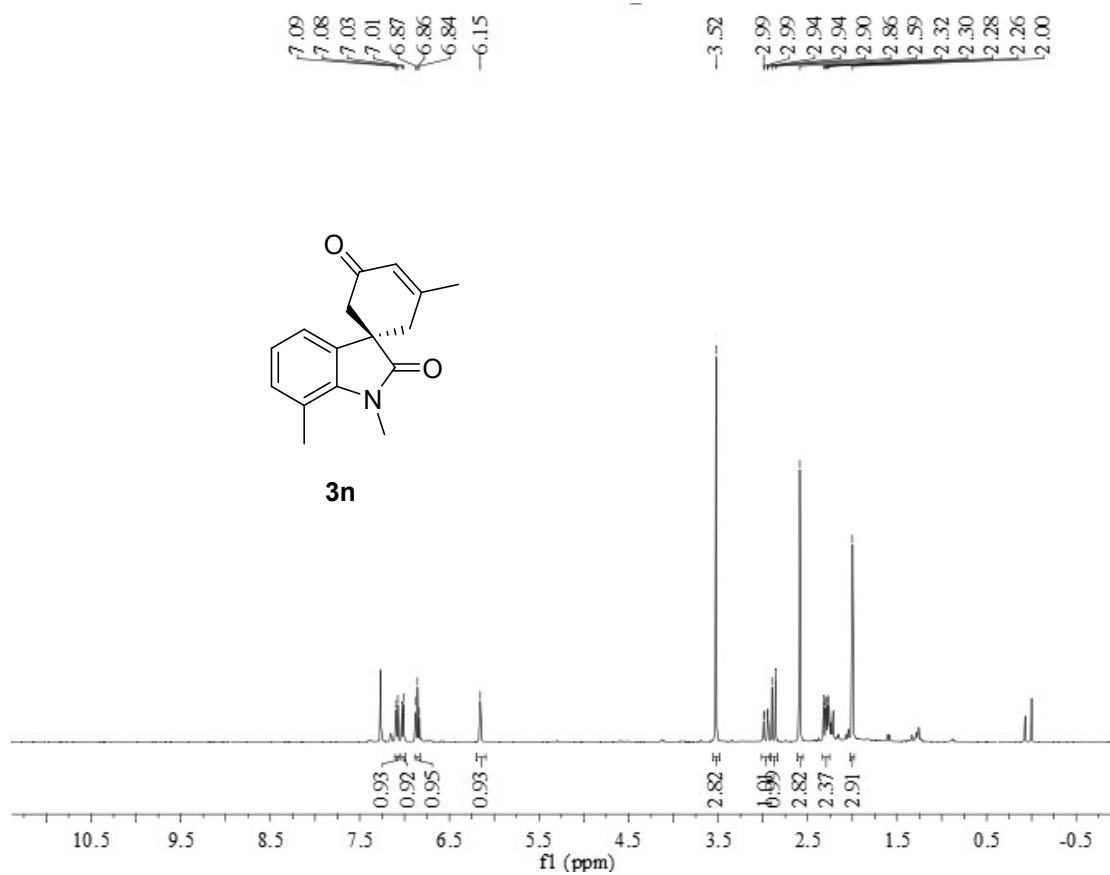

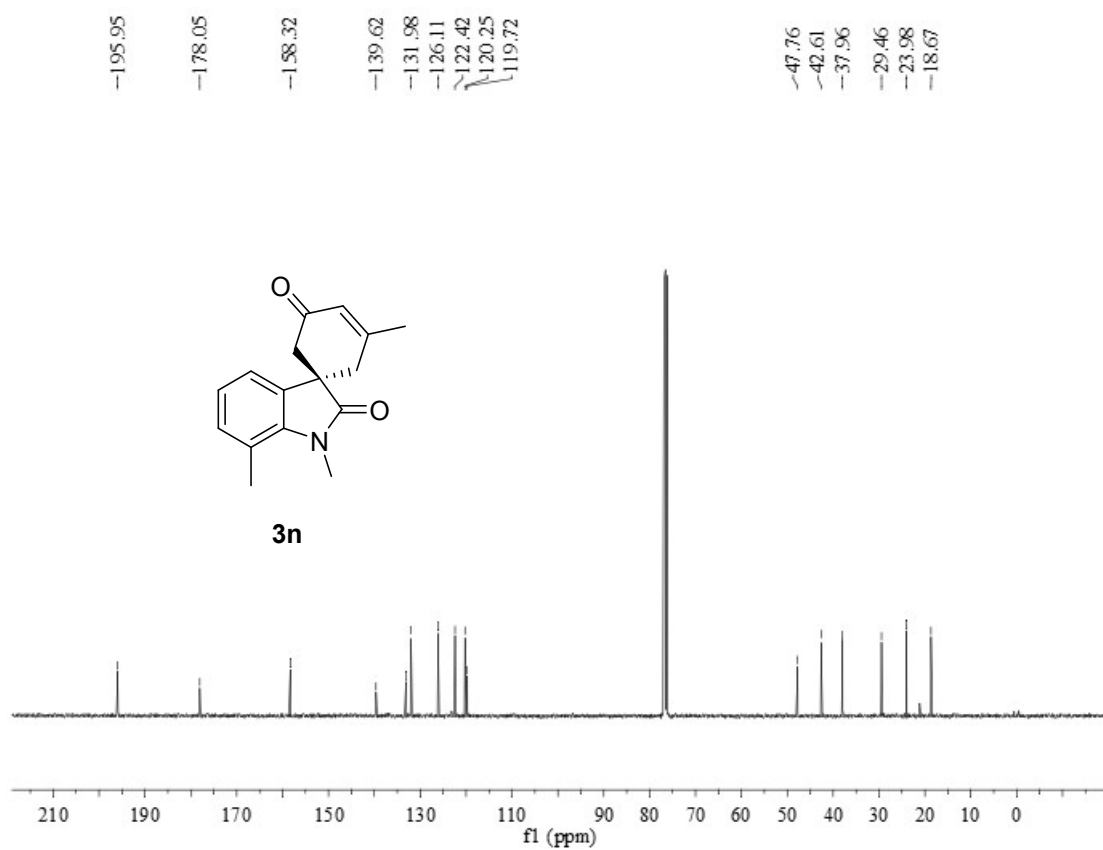

**(R)-3-methyl-1'-phenylspiro[cyclohexane-1,3'-indolin]-3-ene-2',5-dione (3o)**

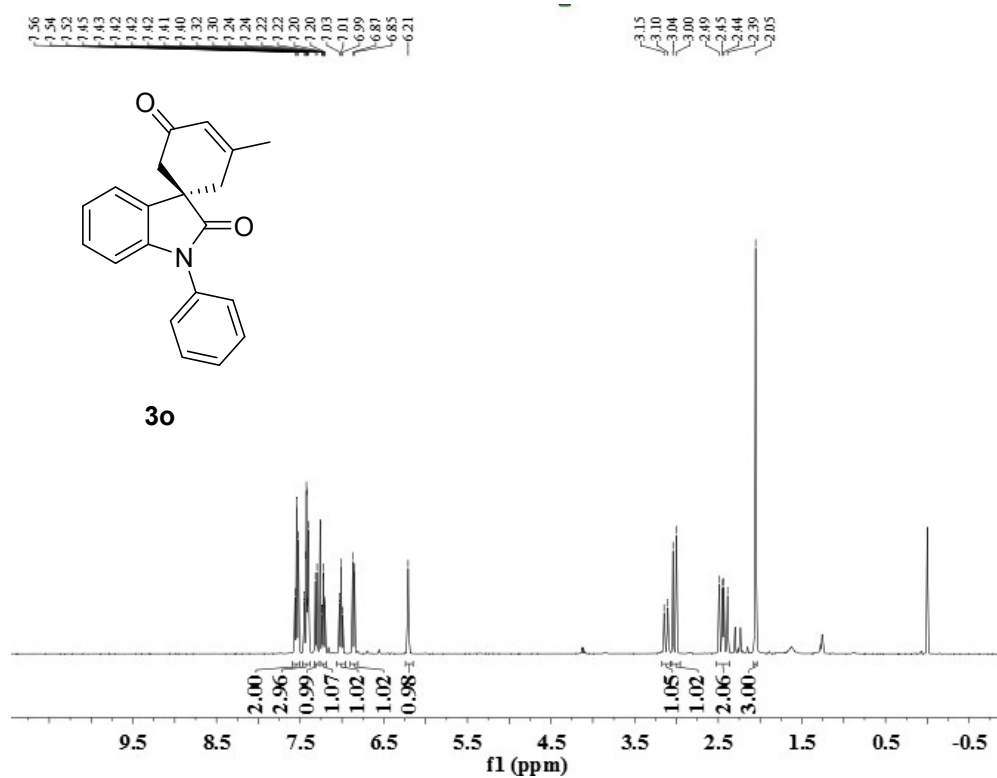



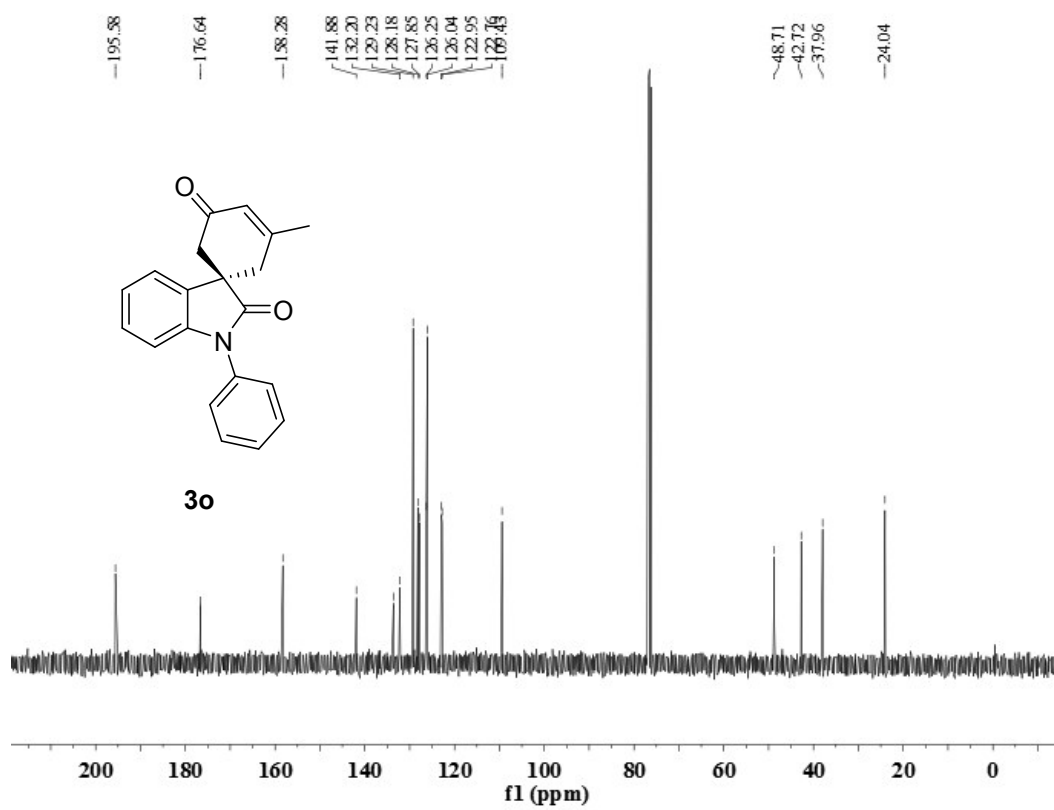

**(R)-1'-benzyl-3-methylspiro[cyclohexane-1,3'-indolin]-3-ene-2',5-dione (3p)**

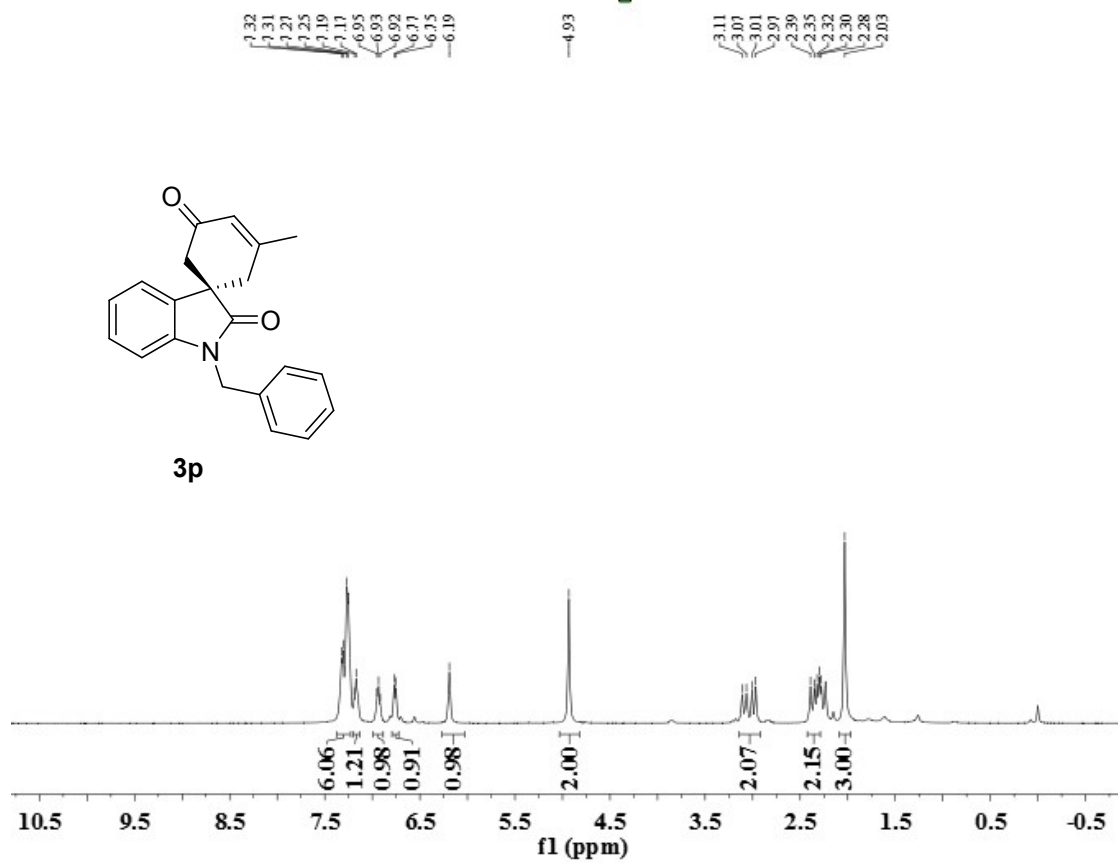

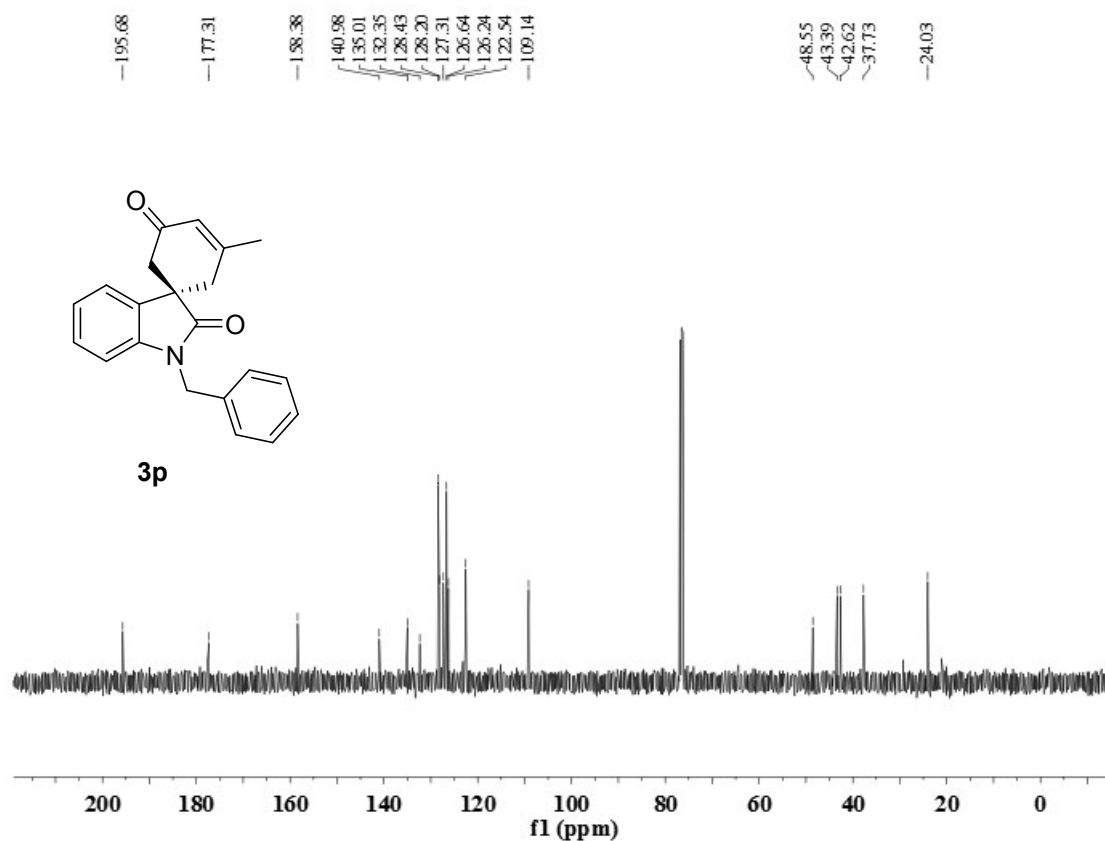

(1*R*,3*S*)-3-hydroxy-1',3-dimethylspiro[cyclohexane-1,3'-indoline]-2',5-dione (**2a**)

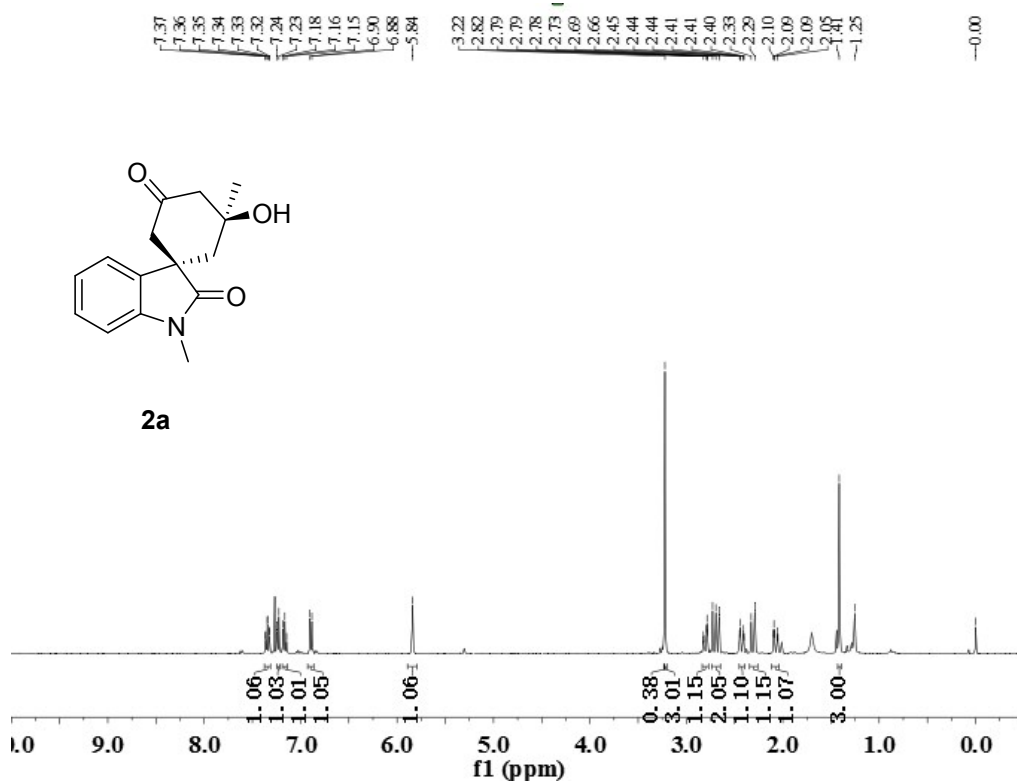

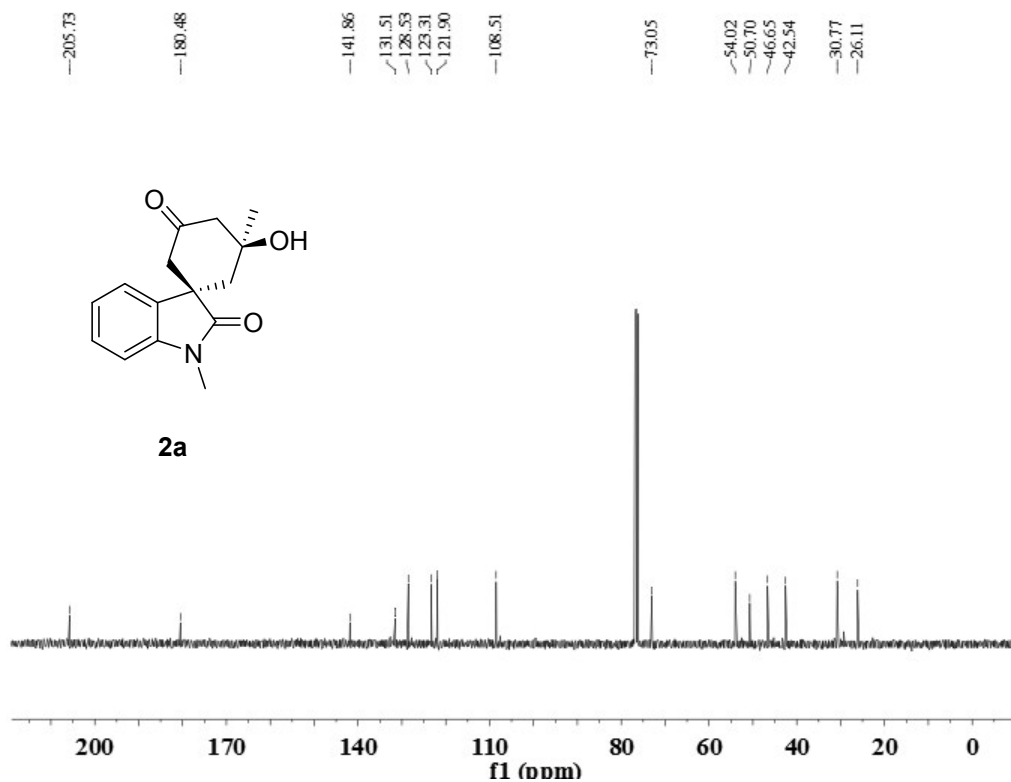

**(1*R*,3*S*)-3-hydroxy-1',3,5'-trimethylspiro[cyclohexane-1,3'-indoline]-2',5-dione (2b)**

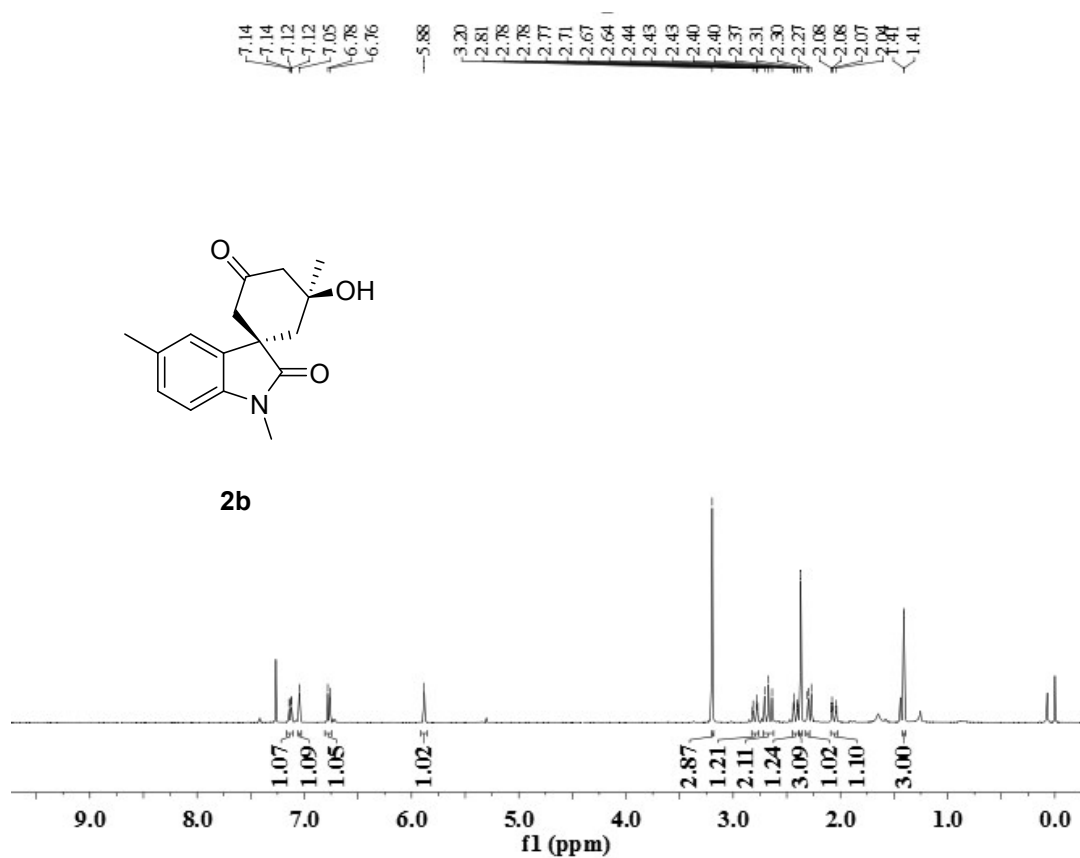

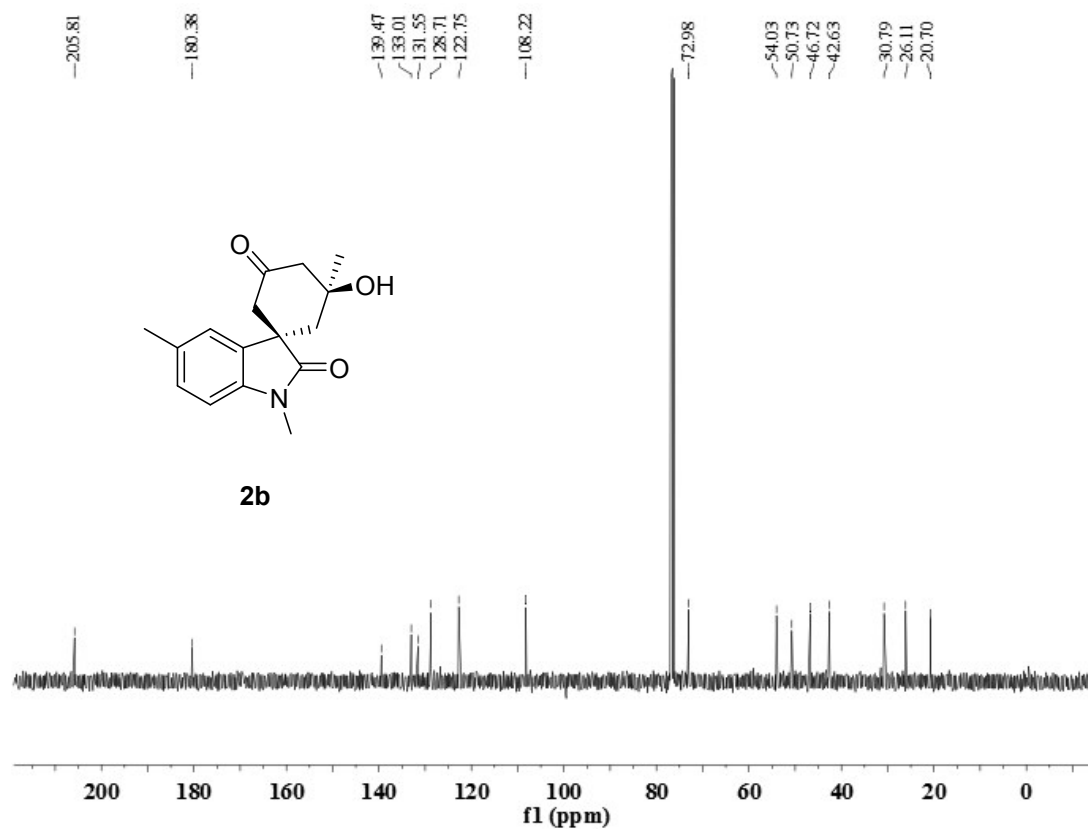

**(1*R*,3*S*)-3-hydroxy-5'-methoxy-1',3-dimethylspiro[cyclohexane-1,3'-indoline]-2',5-dione (2c)**

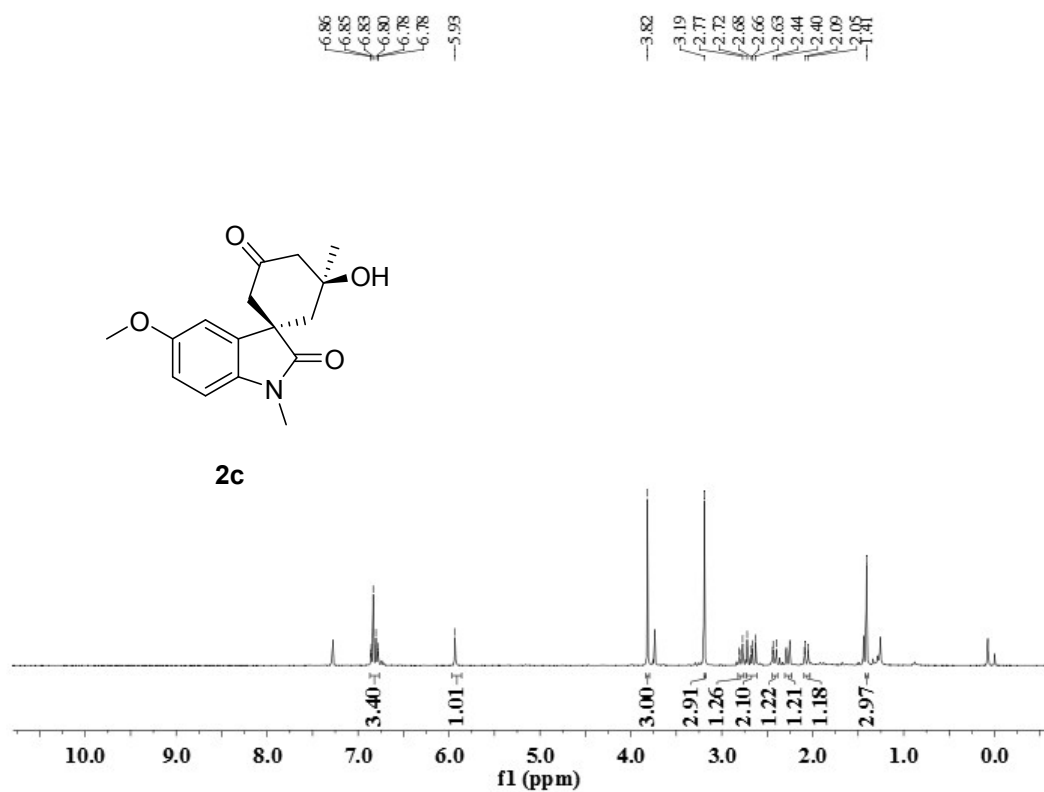

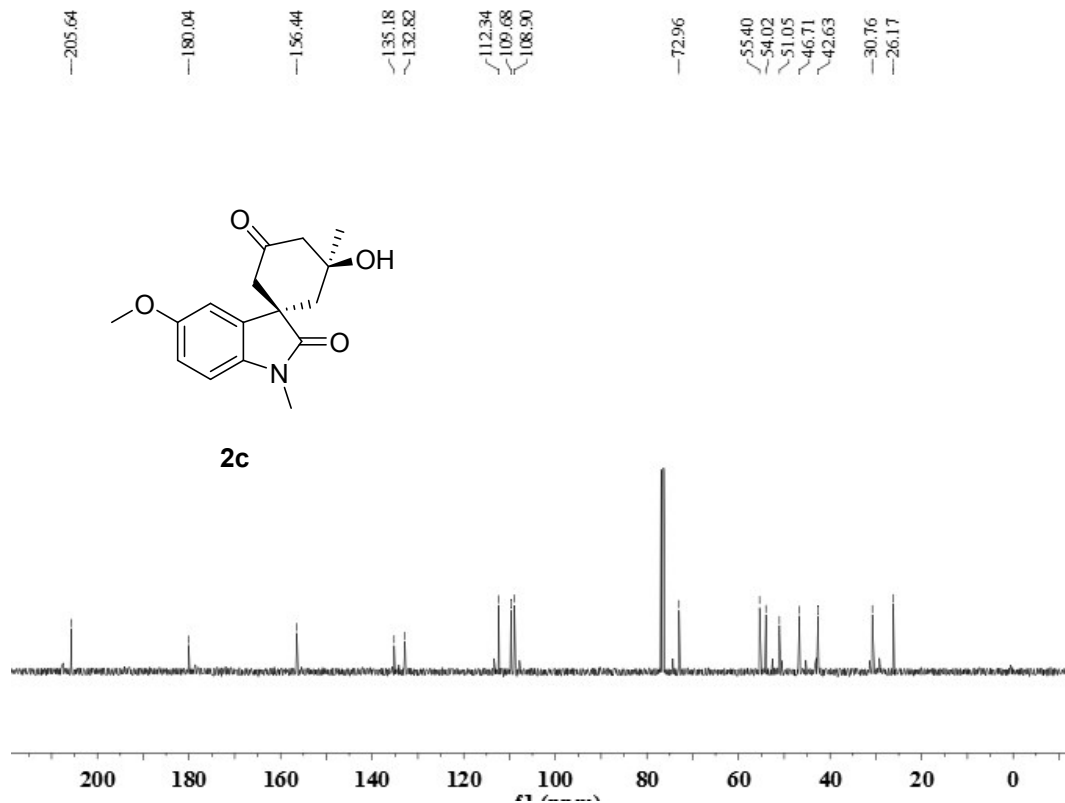

**(1*R*,3*S*)-3-hydroxy-1',3,5',7'-tetramethylspiro[cyclohexane-1,3'-indoline]-2',5-dione (2d)**

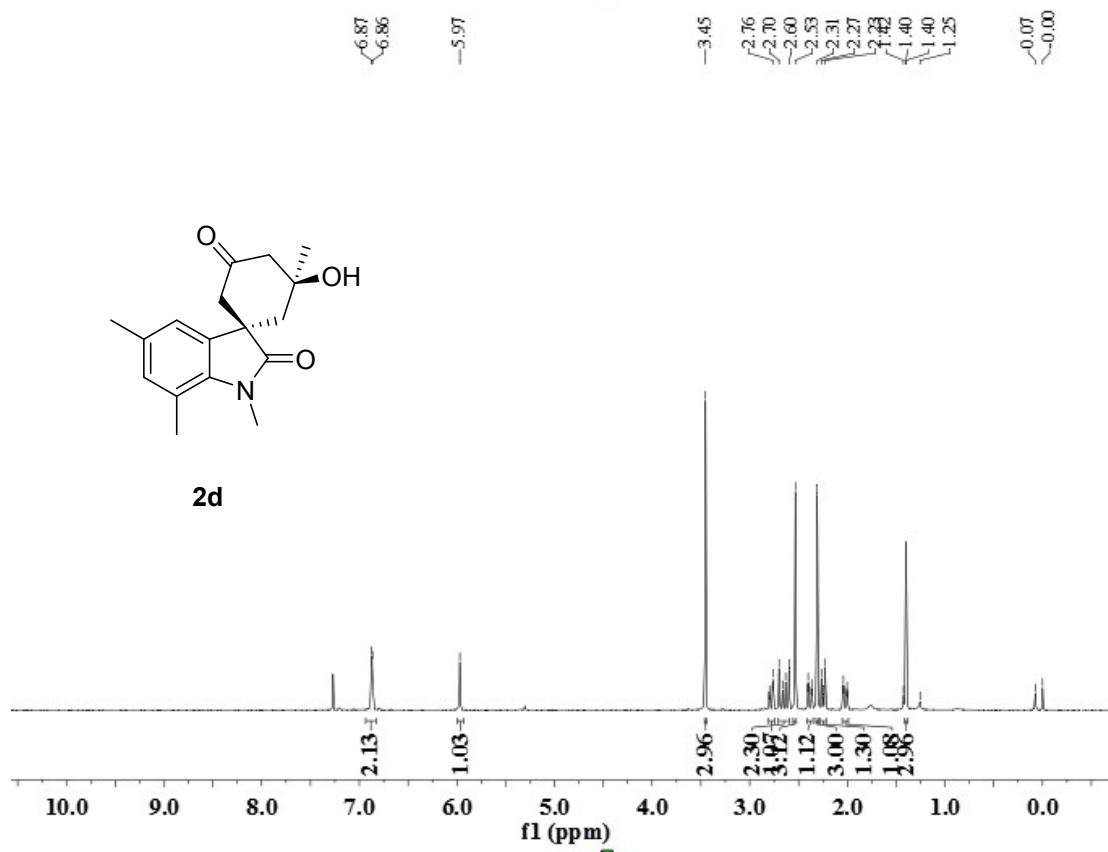

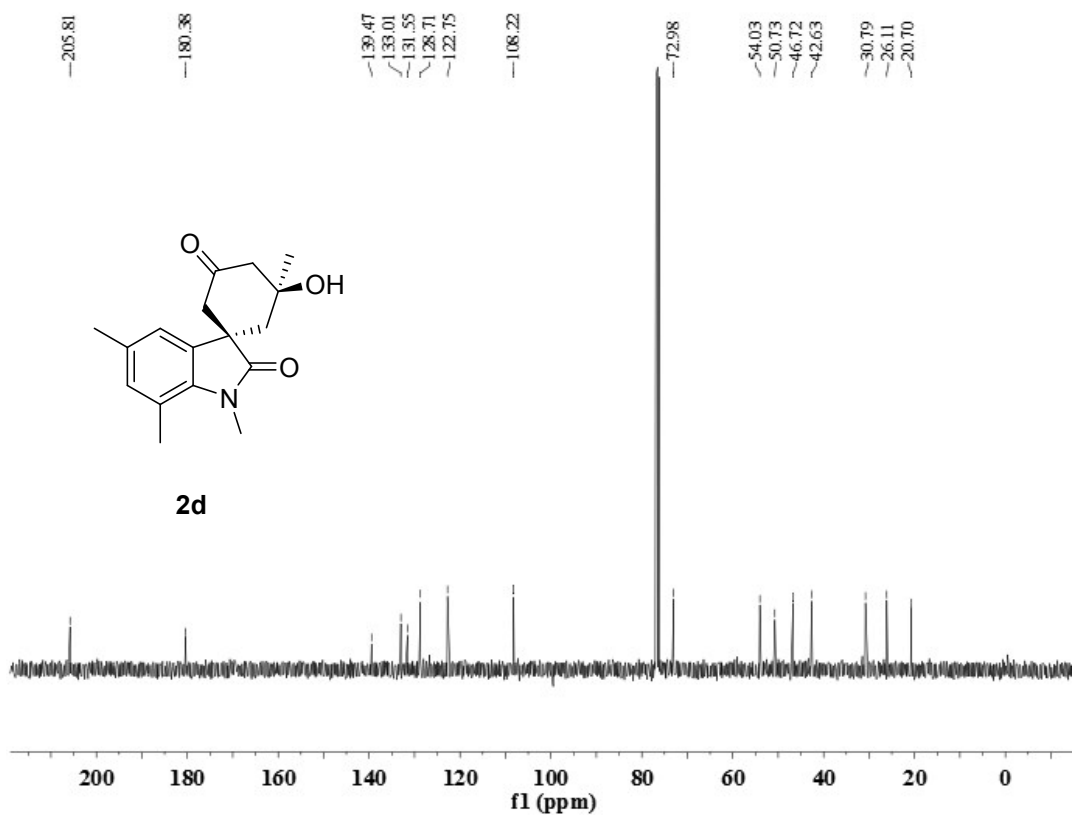

(1*R*,3*S*)-3-hydroxy-1',3,7'-trimethylspiro[cyclohexane-1,3'-indoline]-2',5-dione

(2e)

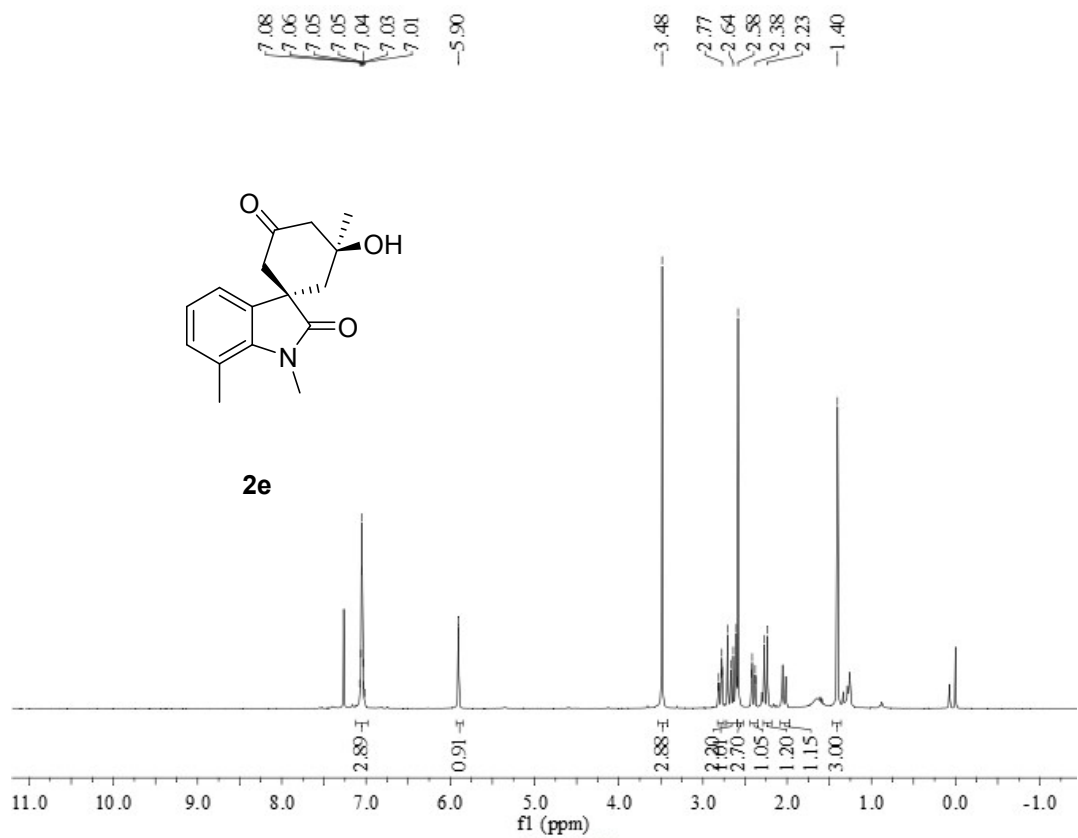

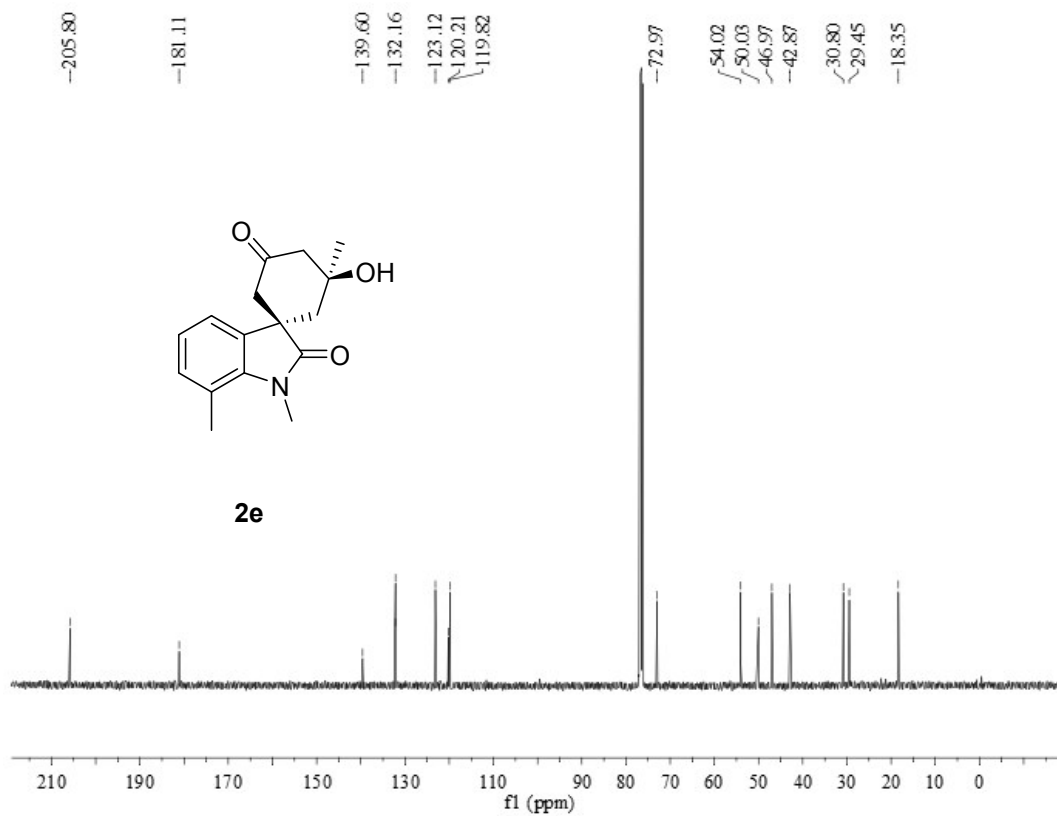

## 6. HPLC spectra

### (*R*)-1',3-dimethylspiro[cyclohexane-1,3'-indolin]-3-ene-2',5-dione (**3a**)

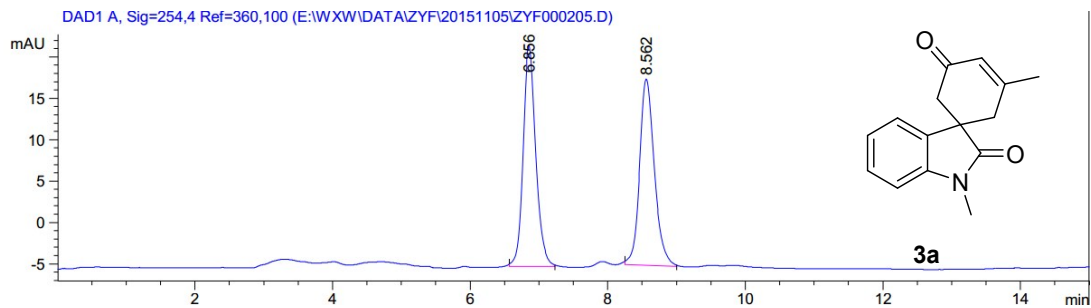

| Peak # | RetTime [min] | Type | Width [min] | Area [mAU*s] | Height [mAU] | Area %  |
|--------|---------------|------|-------------|--------------|--------------|---------|
| 1      | 6.856         | BB   | 0.1943      | 339.72488    | 26.73346     | 50.4525 |
| 2      | 8.562         | BB   | 0.2252      | 333.63165    | 22.46773     | 49.5475 |

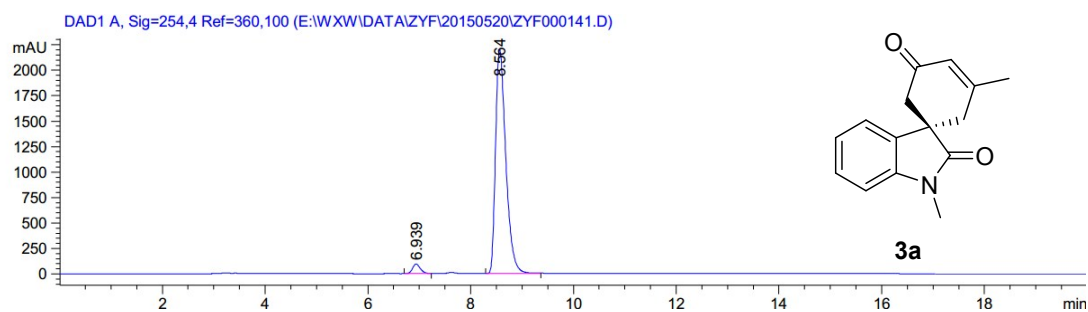

| Peak # | RetTime [min] | Type | Width [min] | Area [mAU*s] | Height [mAU] | Area %  |
|--------|---------------|------|-------------|--------------|--------------|---------|
| 1      | 6.939         | BV   | 0.1646      | 1014.26379   | 94.94855     | 3.2142  |
| 2      | 8.564         | BB   | 0.2140      | 3.05414e4    | 2199.68384   | 96.7858 |



### 1',3,5'-trimethylspiro[cyclohexane-1,3'-indolin]-3-ene-2',5-dione (3b)

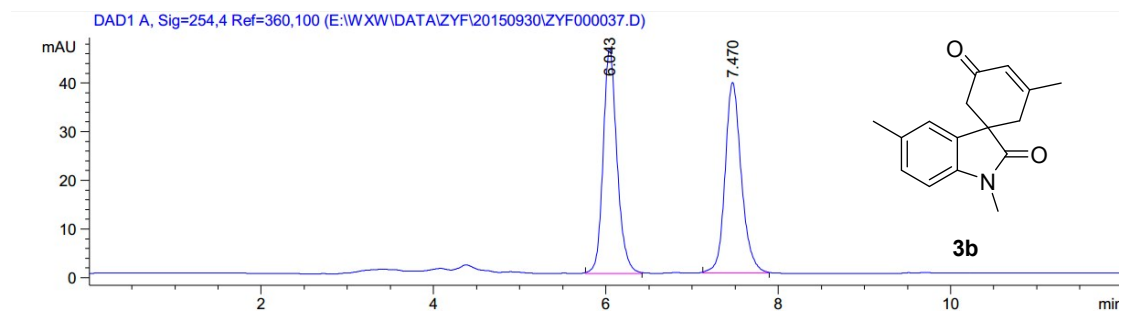

| Peak # | RetTime [min] | Type | Width [min] | Area [mAU*s] | Height [mAU] | Area %  |
|--------|---------------|------|-------------|--------------|--------------|---------|
| 1      | 6.043         | BB   | 0.1705      | 516.59576    | 46.18646     | 50.0381 |
| 2      | 7.470         | BB   | 0.1996      | 515.80853    | 39.16749     | 49.9619 |

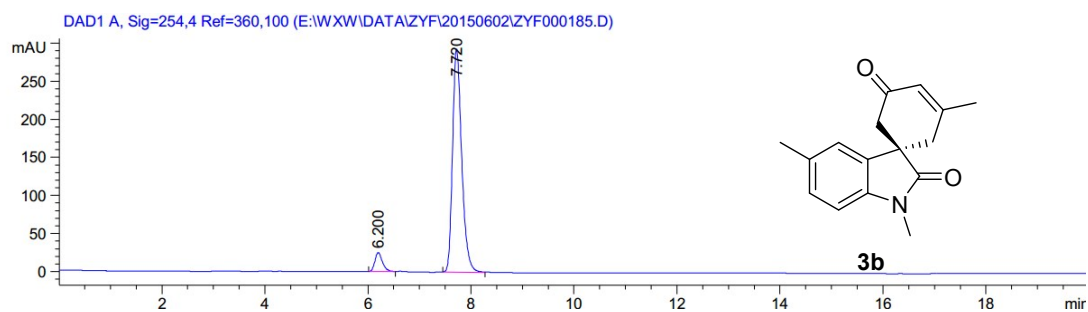

| Peak # | RetTime [min] | Type | Width [min] | Area [mAU*s] | Height [mAU] | Area %  |
|--------|---------------|------|-------------|--------------|--------------|---------|
| 1      | 6.200         | BB   | 0.1548      | 252.23119    | 24.77690     | 6.5184  |
| 2      | 7.720         | BB   | 0.1881      | 3617.31421   | 292.84329    | 93.4816 |

**5'-methoxy-1',3'-dimethylspiro[cyclohexane-1,3'-indolin]-3-ene-2',5-dione (3c)**

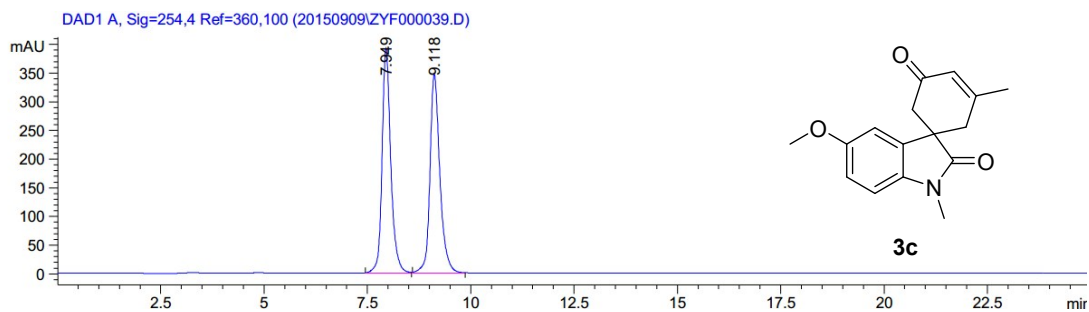

| Peak # | RetTime [min] | Type | Width [min] | Area [mAU*s] | Height [mAU] | Area %  |
|--------|---------------|------|-------------|--------------|--------------|---------|
| 1      | 7.949         | BB   | 0.2212      | 5756.07813   | 392.14700    | 49.9389 |
| 2      | 9.118         | BB   | 0.2503      | 5770.16260   | 346.52817    | 50.0611 |

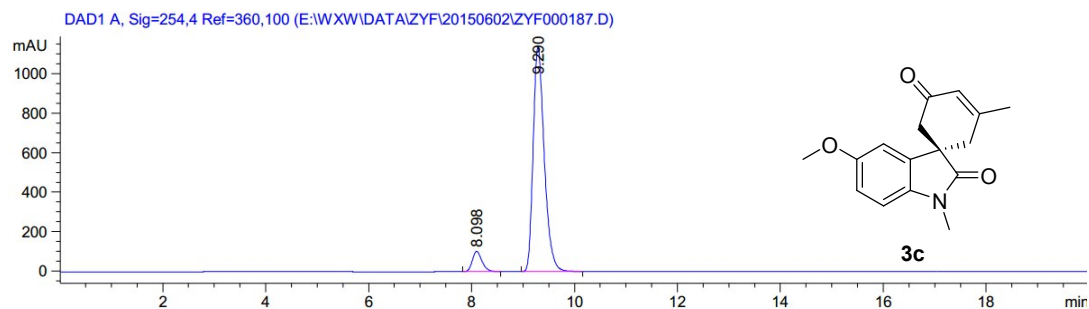

| Peak # | RetTime [min] | Type | Width [min] | Area [mAU*s] | Height [mAU] | Area %  |
|--------|---------------|------|-------------|--------------|--------------|---------|
| 1      | 8.098         | BB   | 0.1988      | 1349.75977   | 103.09045    | 7.3296  |
| 2      | 9.290         | BB   | 0.2295      | 1.70653e4    | 1134.64465   | 92.6704 |

### 1',3',5',7'-tetramethylspiro[cyclohexane-1,3'-indolin]-3-ene-2',5-dione (3d)

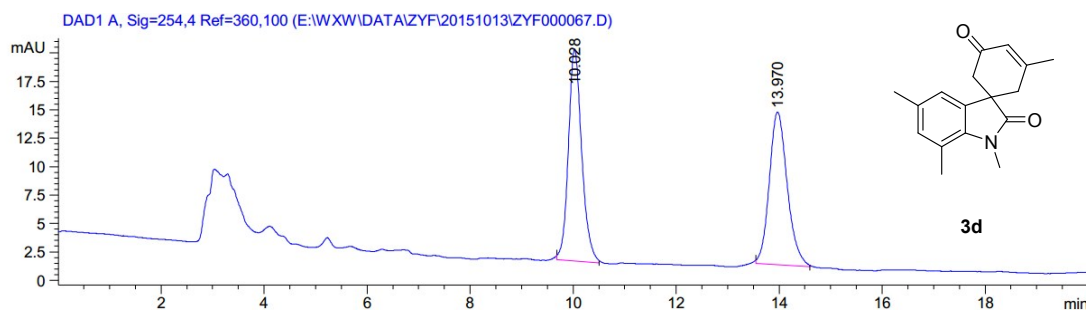

| Peak # | RetTime [min] | Type | Width [min] | Area [mAU*s] | Height [mAU] | Area %  |
|--------|---------------|------|-------------|--------------|--------------|---------|
| 1      | 10.028        | BB   | 0.2736      | 334.70117    | 18.62933     | 50.6620 |
| 2      | 13.970        | BB   | 0.3671      | 325.95453    | 13.43311     | 49.3380 |

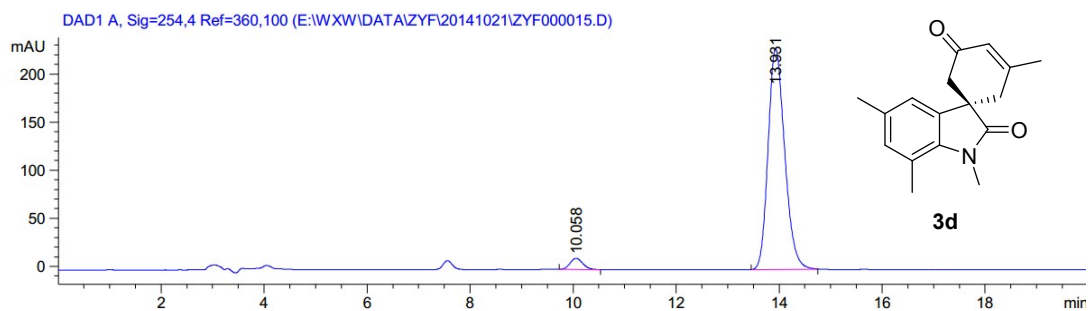

| Peak # | RetTime [min] | Type | Width [min] | Area [mAU*s] | Height [mAU] | Area %  |
|--------|---------------|------|-------------|--------------|--------------|---------|
| 1      | 10.058        | BB   | 0.2664      | 200.94386    | 11.70000     | 3.7485  |
| 2      | 13.931        | BB   | 0.3458      | 5159.68555   | 229.92014    | 96.2515 |

### 5'-fluoro-1',3-dimethylspiro[cyclohexane-1,3'-indolin]-3-ene-2',5-dione (3e)

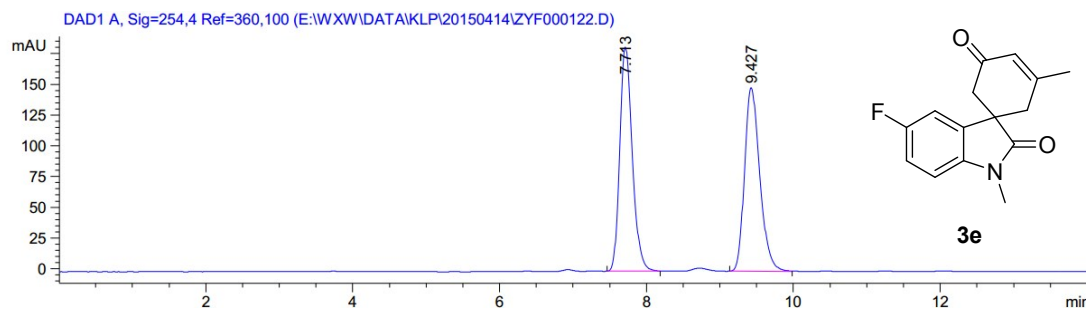

| Peak # | RetTime [min] | Type | Width [min] | Area [mAU*s] | Height [mAU] | Area %  |
|--------|---------------|------|-------------|--------------|--------------|---------|
| 1      | 7.713         | BB   | 0.1819      | 2151.73926   | 182.07396    | 49.9154 |
| 2      | 9.427         | BB   | 0.2207      | 2159.03638   | 149.33194    | 50.0846 |

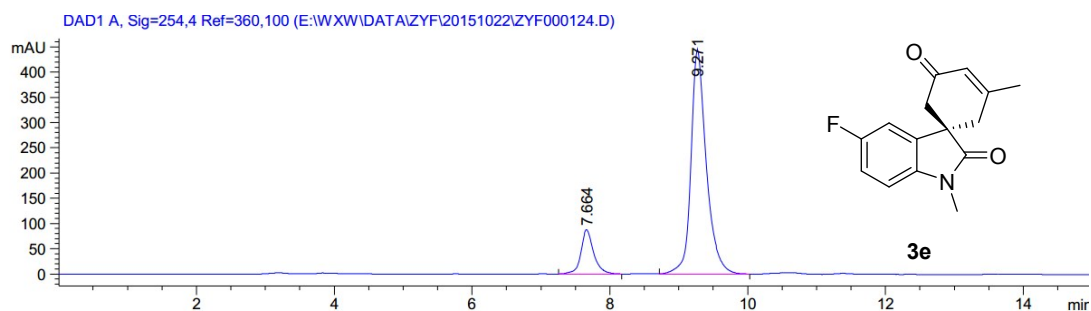

| Peak # | RetTime [min] | Type | Width [min] | Area [mAU*s] | Height [mAU] | Area %  |
|--------|---------------|------|-------------|--------------|--------------|---------|
| 1      | 7.664         | BB   | 0.1949      | 1157.51880   | 88.30658     | 14.2208 |
| 2      | 9.271         | VB   | 0.2328      | 6982.08838   | 445.63812    | 85.7792 |

**5'-chloro-1',3-dimethylspiro[cyclohexane-1,3'-indolin]-3-ene-2',5-dione (3f)**

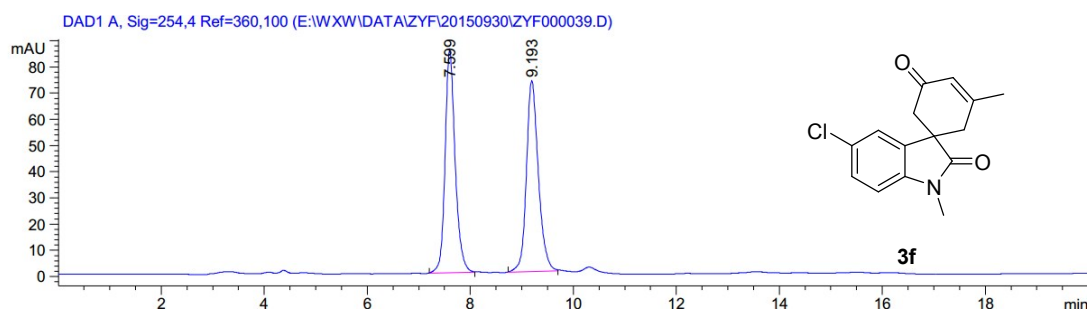

| Peak # | RetTime [min] | Type | Width [min] | Area [mAU*s] | Height [mAU] | Area %  |
|--------|---------------|------|-------------|--------------|--------------|---------|
| 1      | 7.599         | BB   | 0.2064      | 1153.37305   | 84.92987     | 49.6039 |
| 2      | 9.193         | BB   | 0.2418      | 1171.79517   | 72.79231     | 50.3961 |

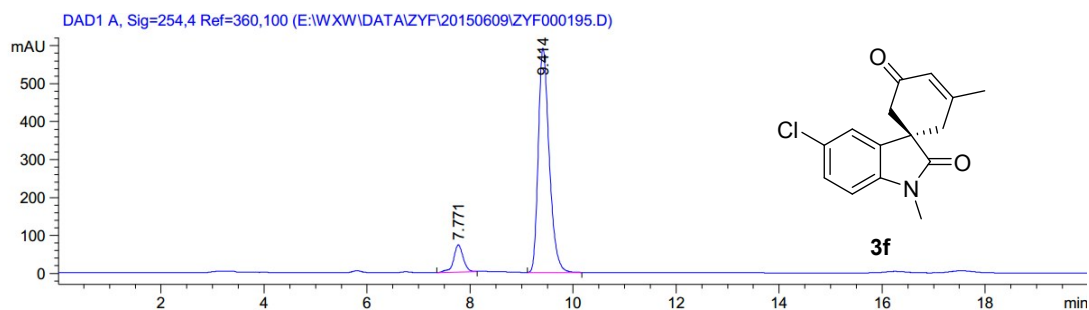

| Peak # | RetTime [min] | Type | Width [min] | Area [mAU*s] | Height [mAU] | Area %  |
|--------|---------------|------|-------------|--------------|--------------|---------|
| 1      | 7.771         | BB   | 0.1971      | 927.12891    | 71.60761     | 9.5893  |
| 2      | 9.414         | BB   | 0.2267      | 8741.28516   | 590.51465    | 90.4107 |

**5'-bromo-1',3-dimethylspiro[cyclohexane-1,3'-indolin]-3-ene-2',5-dione (3g)**

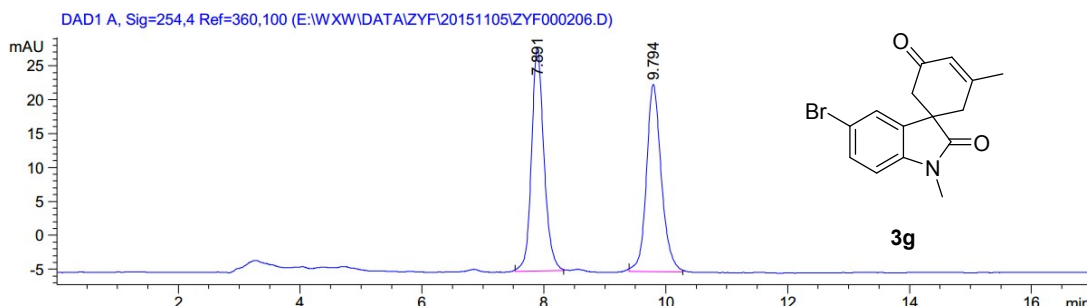

| Peak # | RetTime [min] | Type | Width [min] | Area [mAU*s] | Height [mAU] | Area %  |
|--------|---------------|------|-------------|--------------|--------------|---------|
| 1      | 7.891         | BB   | 0.2162      | 467.76627    | 32.84144     | 49.9543 |
| 2      | 9.794         | BB   | 0.2562      | 468.62155    | 27.57841     | 50.0457 |

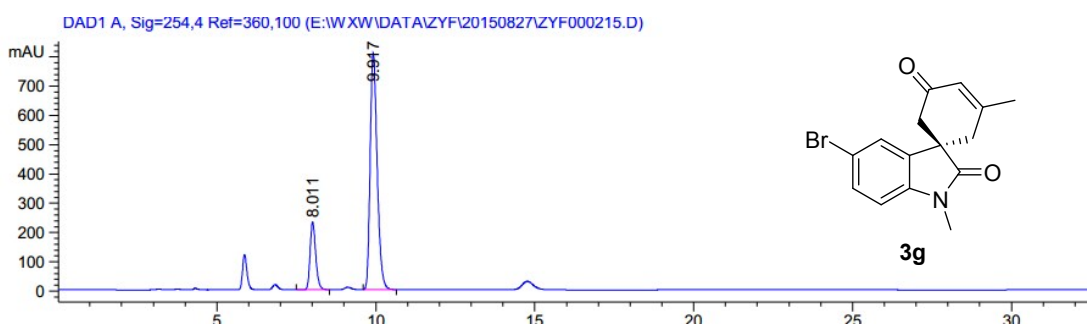

| Peak # | RetTime [min] | Type | Width [min] | Area [mAU*s] | Height [mAU] | Area %  |
|--------|---------------|------|-------------|--------------|--------------|---------|
| 1      | 8.011         | BB   | 0.1876      | 2852.27100   | 231.77048    | 18.7534 |
| 2      | 9.917         | BB   | 0.2342      | 1.23570e4    | 809.18121    | 81.2466 |

### 5'-chloro-1',3-dimethylspiro[cyclohexane-1,3'-indolin]-3-ene-2',5-dione (3h)

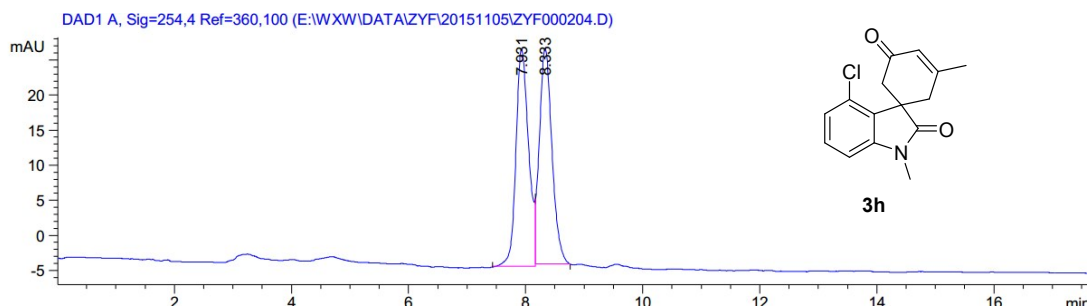

| Peak # | RetTime [min] | Type | Width [min] | Area [mAU*s] | Height [mAU] | Area %  |
|--------|---------------|------|-------------|--------------|--------------|---------|
| 1      | 7.931         | MM R | 0.2528      | 469.52280    | 30.95194     | 50.6795 |
| 2      | 8.333         | MM R | 0.2476      | 456.93179    | 30.76304     | 49.3205 |

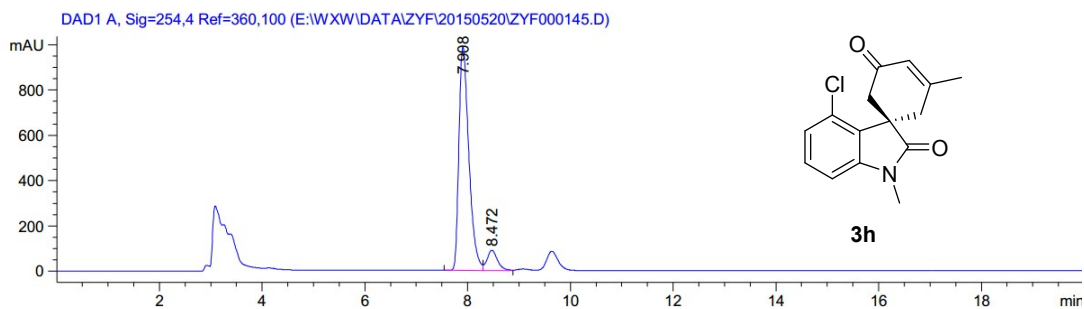

| Peak # | RetTime [min] | Type | Width [min] | Area [mAU*s] | Height [mAU] | Area %  |
|--------|---------------|------|-------------|--------------|--------------|---------|
| 1      | 7.908         | BV   | 0.2070      | 1.32535e4    | 985.13147    | 91.3312 |
| 2      | 8.472         | VV   | 0.2128      | 1257.97449   | 89.04173     | 8.6688  |

### 4'-bromo-1',3-dimethylspiro[cyclohexane-1,3'-indolin]-3-ene-2',5-dione (3i)

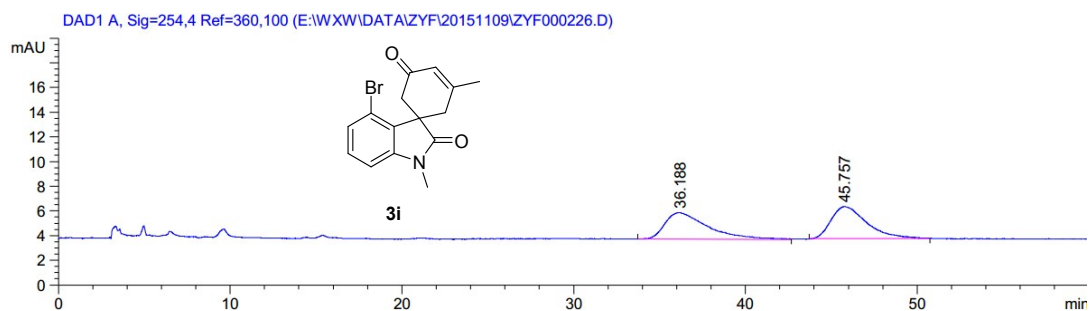

| Peak # | RetTime [min] | Type | Width [min] | Area [mAU*s] | Height [mAU] | Area %  |
|--------|---------------|------|-------------|--------------|--------------|---------|
| 1      | 36.188        | MM R | 2.8788      | 370.32443    | 2.14394      | 49.5123 |
| 2      | 45.757        | MM R | 2.4214      | 377.62030    | 2.59920      | 50.4877 |

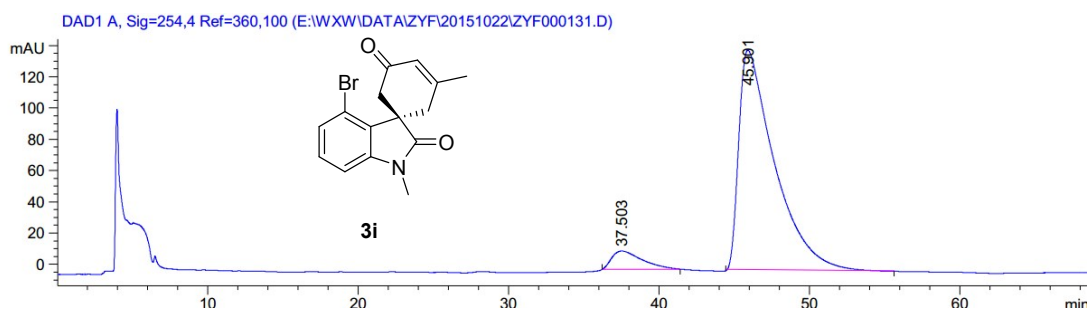

| Peak # | RetTime [min] | Type | Width [min] | Area [mAU*s] | Height [mAU] | Area %  |
|--------|---------------|------|-------------|--------------|--------------|---------|
| 1      | 37.503        | BB   | 1.3751      | 1301.24658   | 11.10434     | 5.6072  |
| 2      | 45.901        | BB   | 2.1621      | 2.19057e4    | 140.10556    | 94.3928 |



**6'-bromo-1',3-dimethylspiro[cyclohexane-1,3'-indolin]-3-ene-2',5-dione (3j)**

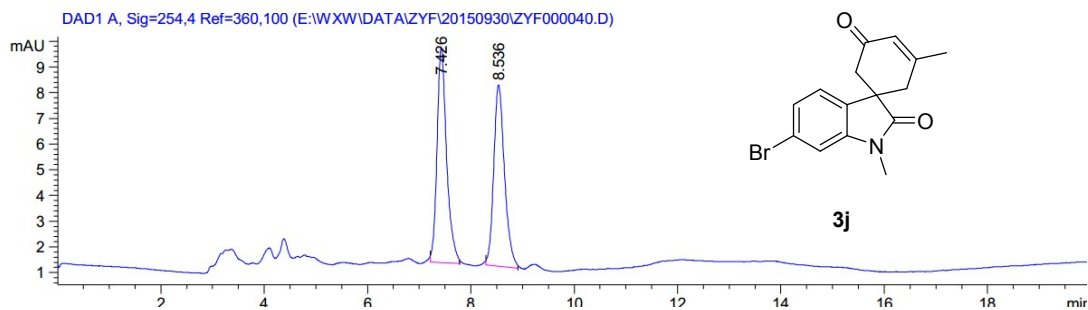

| Peak # | RetTime [min] | Type | Width [min] | Area [mAU*s] | Height [mAU] | Area %  |
|--------|---------------|------|-------------|--------------|--------------|---------|
| 1      | 7.426         | BB   | 0.1923      | 107.73447    | 8.36507      | 51.3815 |
| 2      | 8.536         | BB   | 0.2187      | 101.94128    | 7.04884      | 48.6185 |

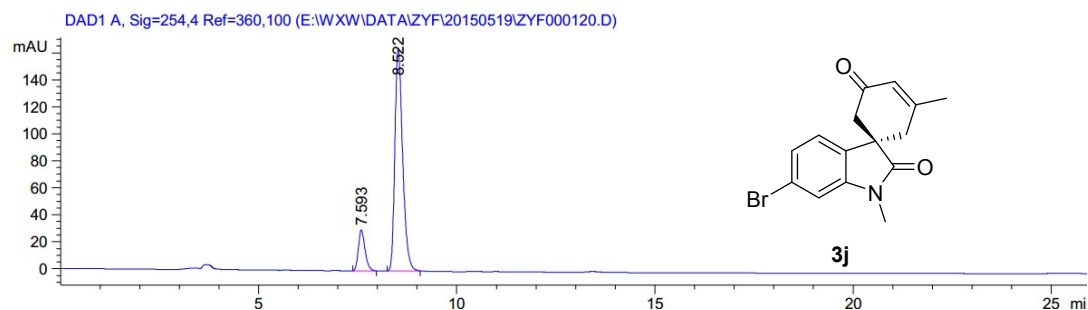

| Peak # | RetTime [min] | Type | Width [min] | Area [mAU*s] | Height [mAU] | Area %  |
|--------|---------------|------|-------------|--------------|--------------|---------|
| 1      | 7.593         | BB   | 0.1793      | 357.39322    | 30.37880     | 13.6885 |
| 2      | 8.522         | BB   | 0.2094      | 2253.50781   | 164.96368    | 86.3115 |

**6'-chloro-1',3-dimethylspiro[cyclohexane-1,3'-indolin]-3-ene-2',5-dione (3k)**

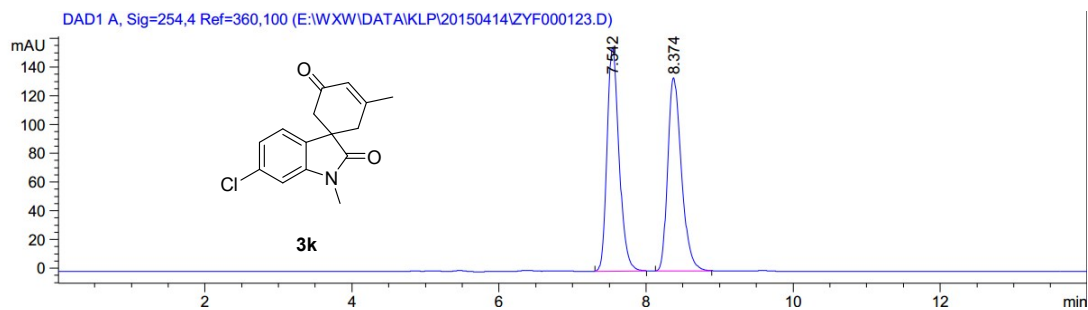

| Peak # | RetTime [min] | Type | Width [min] | Area [mAU*s] | Height [mAU] | Area %  |
|--------|---------------|------|-------------|--------------|--------------|---------|
| 1      | 7.542         | BB   | 0.1727      | 1773.67383   | 155.96324    | 50.4038 |
| 2      | 8.374         | BB   | 0.1993      | 1745.25220   | 134.53914    | 49.5962 |

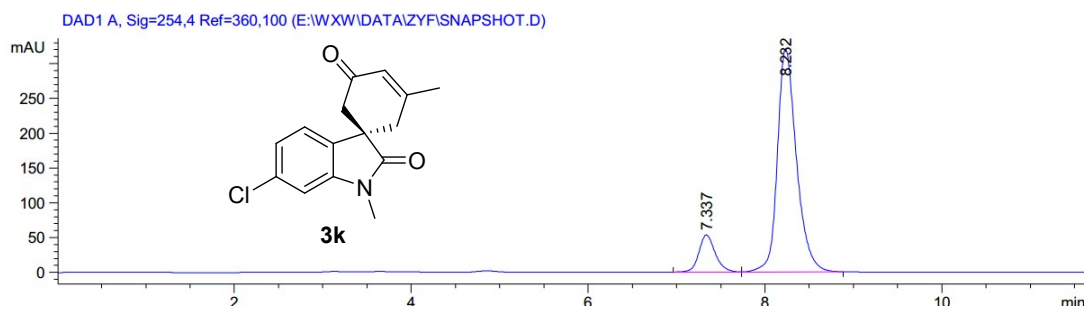

| Peak # | RetTime [min] | Type | Width [min] | Area [mAU*s] | Height [mAU] | Area %  |
|--------|---------------|------|-------------|--------------|--------------|---------|
| 1      | 7.337         | BV   | 0.1971      | 693.66931    | 53.56949     | 12.6004 |
| 2      | 8.232         | VB   | 0.2272      | 4811.44678   | 320.31149    | 87.3996 |

**7'-chloro-1',3-dimethylspiro[cyclohexane-1,3'-indolin]-3-ene-2',5-dione (3I)**

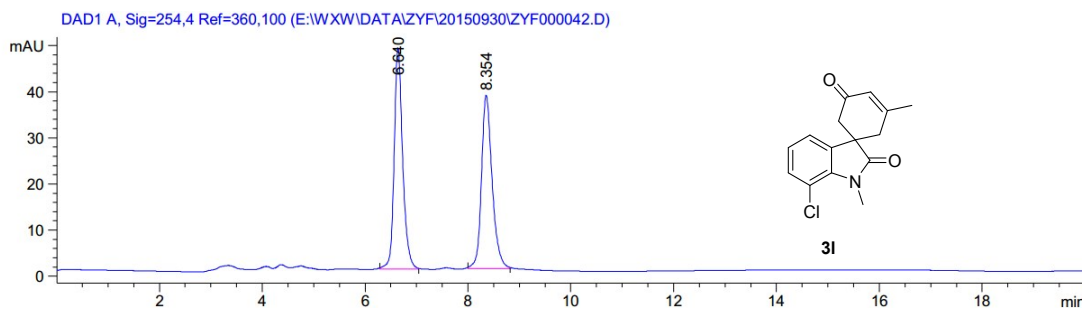

| Peak # | RetTime [min] | Type | Width [min] | Area [mAU*s] | Height [mAU] | Area %  |
|--------|---------------|------|-------------|--------------|--------------|---------|
| 1      | 6.640         | BB   | 0.1721      | 551.96350    | 48.01515     | 50.3766 |
| 2      | 8.354         | BB   | 0.2163      | 543.71136    | 37.68377     | 49.6234 |

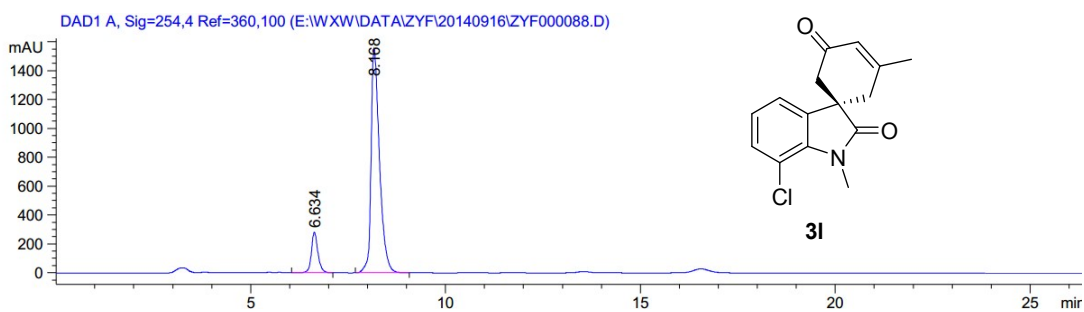

| Peak # | RetTime [min] | Type | Width [min] | Area [mAU*s] | Height [mAU] | Area %  |
|--------|---------------|------|-------------|--------------|--------------|---------|
| 1      | 6.634         | VB   | 0.1714      | 3276.45117   | 282.23920    | 12.2829 |
| 2      | 8.168         | BB   | 0.2262      | 2.33984e4    | 1549.07703   | 87.7171 |

7'-fluoro-1',3-dimethylspiro[cyclohexane-1,3'-indolin]-3-ene-2',5-dione (3m)

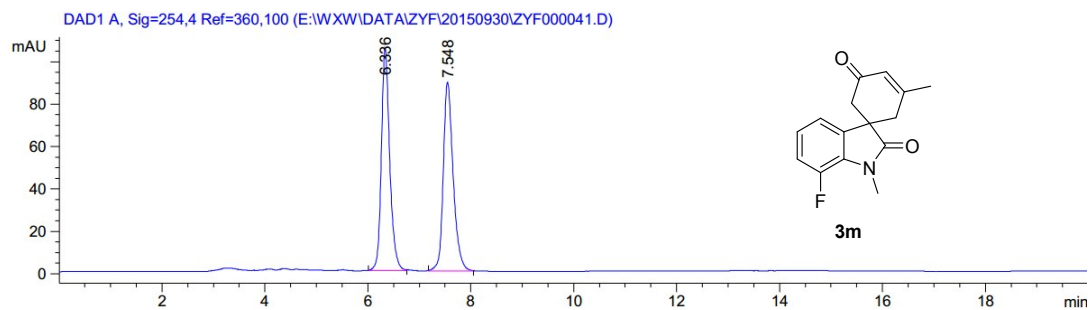

| Peak # | RetTime [min] | Type | Width [min] | Area [mAU*s] | Height [mAU] | Area %  |
|--------|---------------|------|-------------|--------------|--------------|---------|
| 1      | 6.336         | BB   | 0.1696      | 1184.29163   | 104.96521    | 49.9159 |
| 2      | 7.548         | BB   | 0.2016      | 1188.28357   | 89.09842     | 50.0841 |

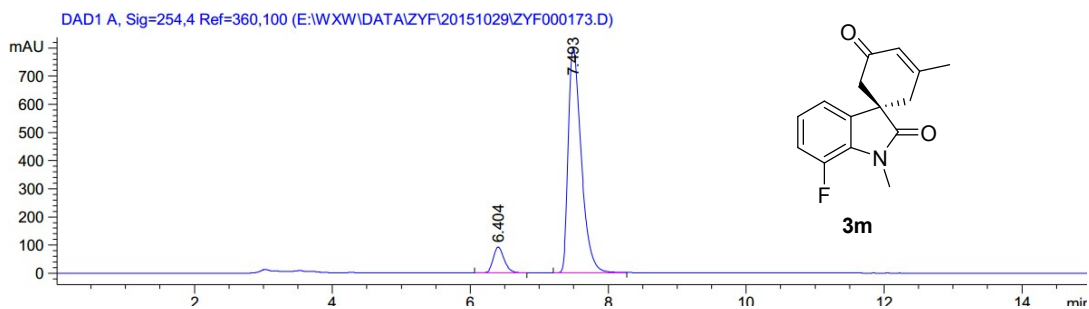

| Peak # | RetTime [min] | Type | Width [min] | Area [mAU*s] | Height [mAU] | Area %  |
|--------|---------------|------|-------------|--------------|--------------|---------|
| 1      | 6.404         | BB   | 0.1686      | 1014.88550   | 92.09166     | 8.8784  |
| 2      | 7.493         | BB   | 0.1983      | 1.04161e4    | 797.77057    | 91.1216 |

# 1',3,7'-trimethylspiro[cyclohexane-1,3'-indolin]-3-ene-2',5-dione (3n)

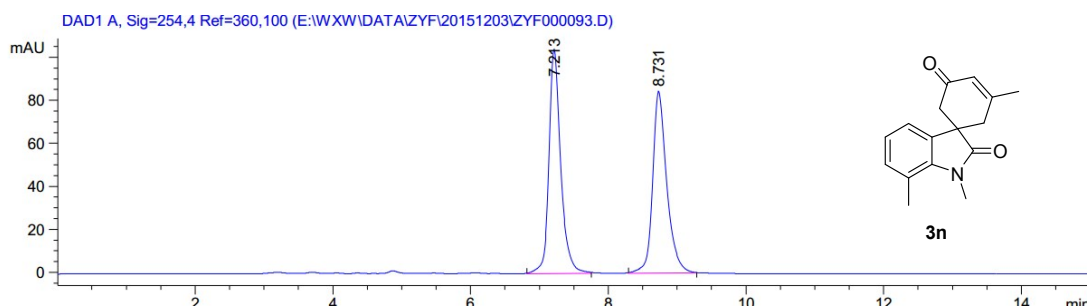

| Peak # | RetTime [min] | Type | Width [min] | Area [mAU*s] | Height [mAU] | Area %  |
|--------|---------------|------|-------------|--------------|--------------|---------|
| 1      | 7.213         | BB   | 0.1732      | 1225.34460   | 104.18589    | 50.2411 |
| 2      | 8.731         | BB   | 0.2152      | 1213.58630   | 84.69070     | 49.7589 |

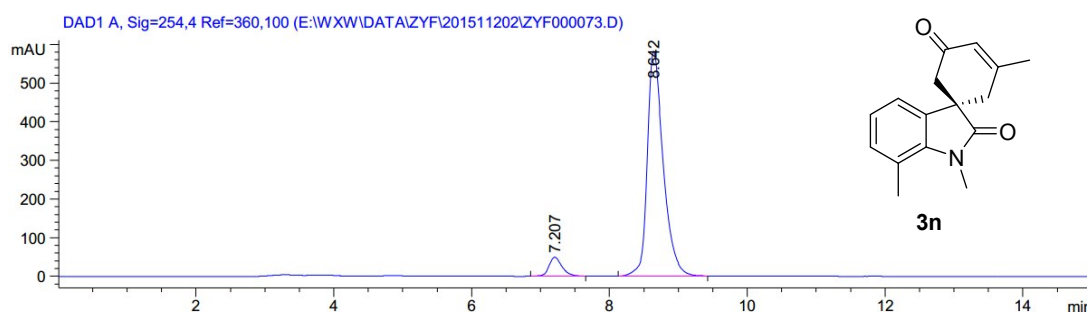

| Peak # | RetTime [min] | Type | Width [min] | Area [mAU*s] | Height [mAU] | Area %  |
|--------|---------------|------|-------------|--------------|--------------|---------|
| 1      | 7.207         | BB   | 0.1985      | 651.96814    | 49.24111     | 6.5212  |
| 2      | 8.642         | BB   | 0.2413      | 9345.73340   | 582.23889    | 93.4788 |

### 3-methyl-1'-phenylspiro[cyclohexane-1,3'-indolin]-3-ene-2',5-dione (3o)

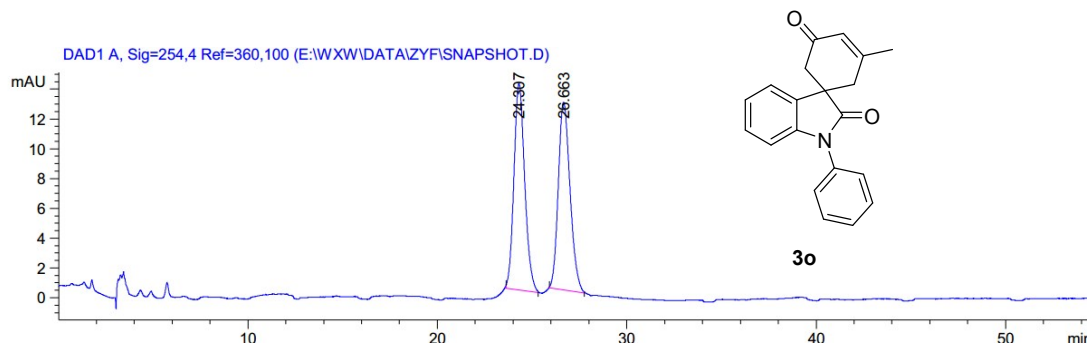

| Peak # | RetTime [min] | Type | Width [min] | Area [mAU*s] | Height [mAU] | Area %  |
|--------|---------------|------|-------------|--------------|--------------|---------|
| 1      | 24.307        | BB   | 0.6029      | 547.71802    | 13.86528     | 50.2490 |
| 2      | 26.663        | BB   | 0.6406      | 542.28992    | 12.58837     | 49.7510 |

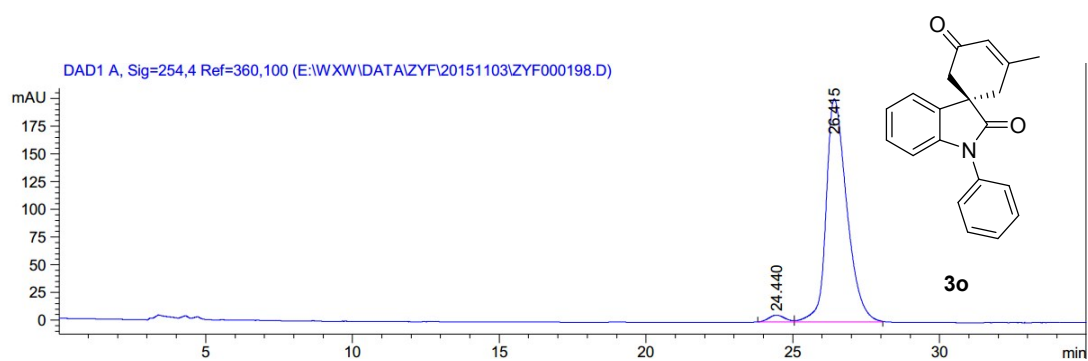

| Peak # | RetTime [min] | Type | Width [min] | Area [mAU*s] | Height [mAU] | Area %  |
|--------|---------------|------|-------------|--------------|--------------|---------|
| 1      | 24.440        | BV   | 0.5628      | 234.82584    | 6.13196      | 2.3278  |
| 2      | 26.415        | VB   | 0.7419      | 9852.85938   | 200.98625    | 97.6722 |

# 1'-benzyl-3-methylspiro[cyclohexane-1,3'-indolin]-3-ene-2',5-dione (3p)

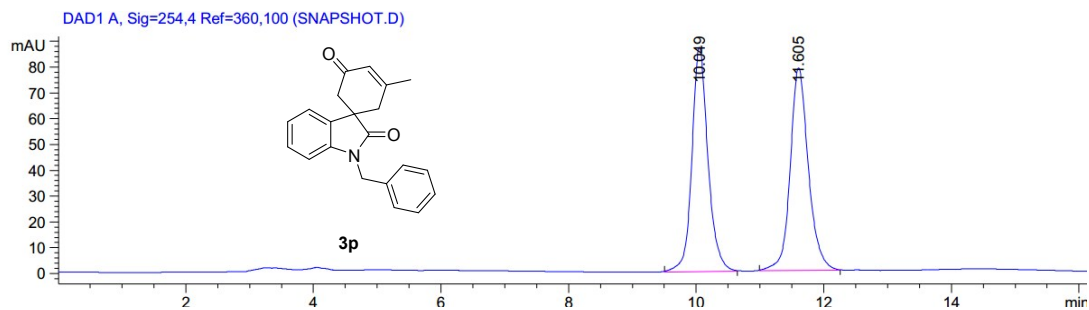

| Peak # | RetTime [min] | Type | Width [min] | Area [mAU*s] | Height [mAU] | Area %  |
|--------|---------------|------|-------------|--------------|--------------|---------|
| 1      | 10.049        | BB   | 0.2643      | 1521.46082   | 86.89236     | 49.4092 |
| 2      | 11.605        | BB   | 0.2995      | 1557.84839   | 78.52006     | 50.5908 |

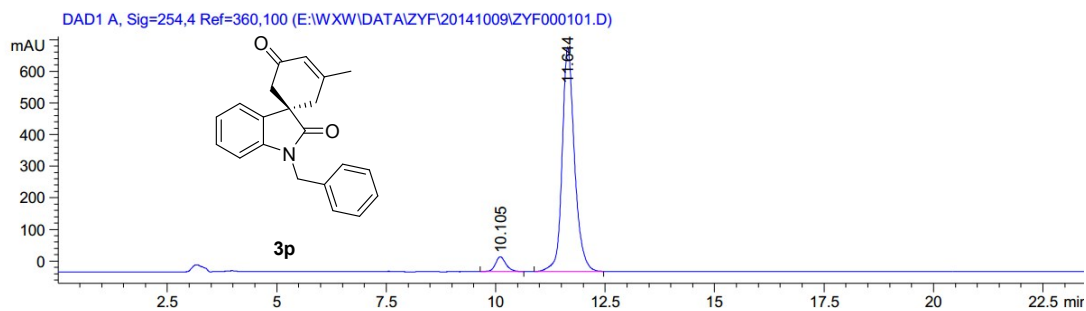

Signal 1: DAD1 A, Sig=254,4 Ref=360,100

| Peak # | RetTime [min] | Type | Width [min] | Area [mAU*s] | Height [mAU] | Area %  |
|--------|---------------|------|-------------|--------------|--------------|---------|
| 1      | 10.105        | BB   | 0.2567      | 807.36365    | 47.40277     | 5.4641  |
| 2      | 11.644        | BB   | 0.2960      | 1.39683e4    | 708.40112    | 94.5359 |

### 3-hydroxy-1',3'-dimethylspiro[cyclohexane-1,3'-indoline]-2',5-dione (2a)

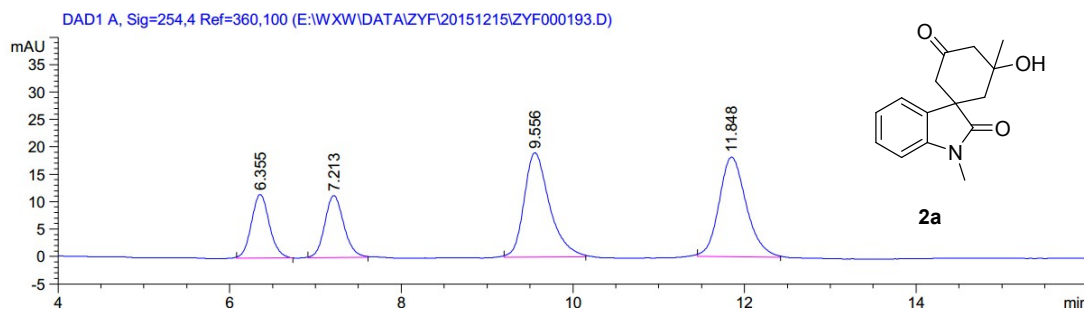

| Peak # | RetTime [min] | Type | Width [min] | Area [mAU*s] | Height [mAU] | Area %  |
|--------|---------------|------|-------------|--------------|--------------|---------|
| 1      | 6.355         | BB   | 0.2240      | 169.32706    | 11.62207     | 14.8749 |
| 2      | 7.213         | BB   | 0.2374      | 173.42807    | 11.27518     | 15.2352 |
| 3      | 9.556         | BB   | 0.3130      | 393.67847    | 19.05595     | 34.5835 |
| 4      | 11.848        | BB   | 0.3358      | 401.90729    | 18.18920     | 35.3064 |

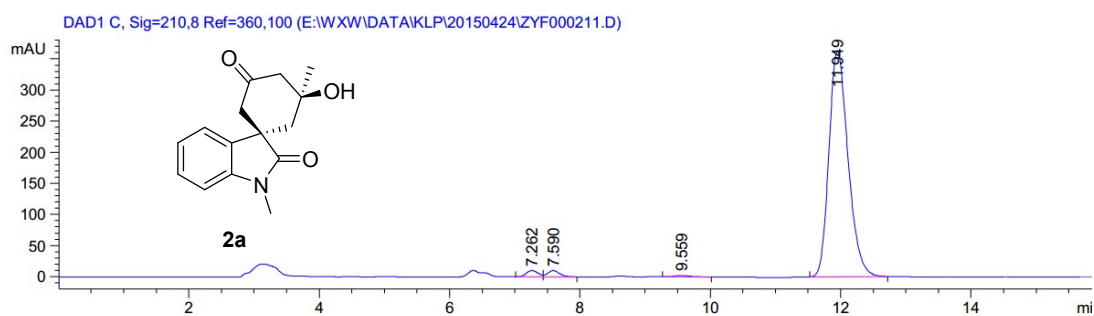



### 3-hydroxy-1',3,5'-trimethylspiro[cyclohexane-1,3'-indoline]-2',5-dione (2b)

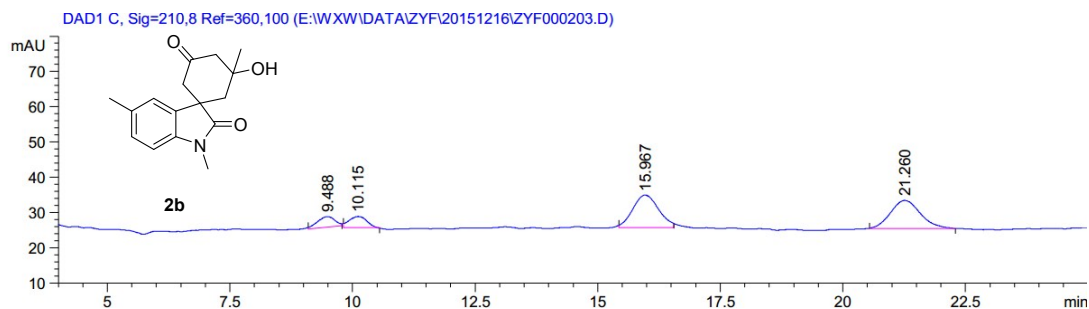

| Peak # | RetTime [min] | Type | Width [min] | Area [mAU*s] | Height [mAU] | Area %  |
|--------|---------------|------|-------------|--------------|--------------|---------|
| 1      | 9.488         | MM R | 0.4188      | 74.67024     | 2.97153      | 9.0823  |
| 2      | 10.115        | MM R | 0.4116      | 76.29781     | 3.08954      | 9.2802  |
| 3      | 15.967        | MM R | 0.6074      | 333.84363    | 9.16007      | 40.6059 |
| 4      | 21.260        | BB   | 0.5916      | 337.34375    | 7.94187      | 41.0316 |

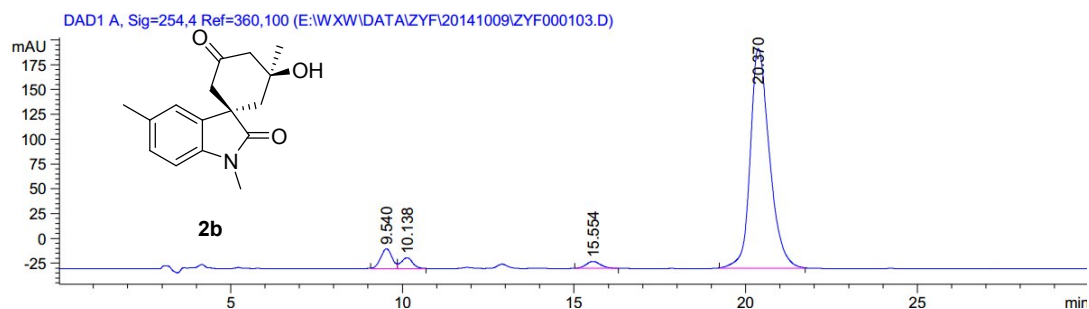

| Peak # | RetTime [min] | Type | Width [min] | Area [mAU*s] | Height [mAU] | Area %  |
|--------|---------------|------|-------------|--------------|--------------|---------|
| 1      | 9.540         | BV   | 0.3554      | 454.96243    | 19.84818     | 4.7709  |
| 2      | 10.138        | VB   | 0.3531      | 250.33028    | 10.77384     | 2.6251  |
| 3      | 15.554        | BB   | 0.4426      | 202.23689    | 6.92706      | 2.1207  |
| 4      | 20.370        | BB   | 0.5887      | 8628.59277   | 221.41458    | 90.4832 |

### 3-hydroxy-5'-methoxy-1',3'-dimethylspiro[cyclohexane-1,3'-indoline]-2',5-dione

(2c)

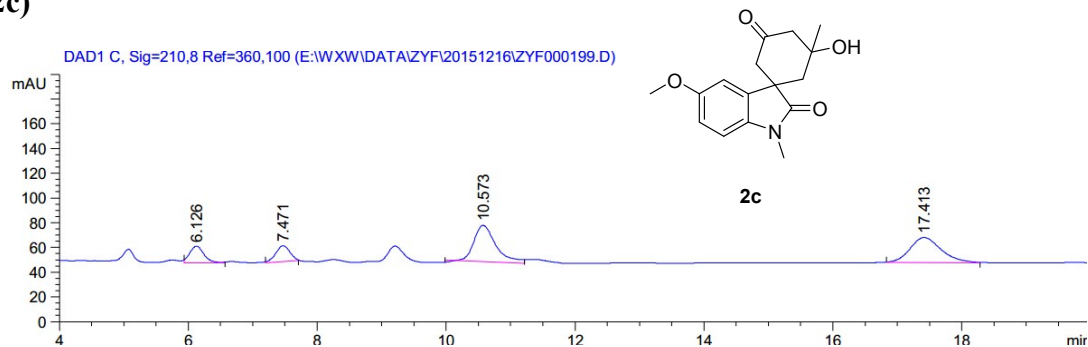

| Peak # | RetTime [min] | Type | Width [min] | Area [mAU*s] | Height [mAU] | Area %  |
|--------|---------------|------|-------------|--------------|--------------|---------|
| 1      | 6.126         | MM R | 0.2592      | 211.28902    | 13.58677     | 11.7765 |
| 2      | 7.471         | MM R | 0.2579      | 200.43352    | 12.95466     | 11.1714 |
| 3      | 10.573        | MM R | 0.3964      | 697.37708    | 29.32057     | 38.8693 |
| 4      | 17.413        | BB   | 0.5086      | 685.05927    | 20.25360     | 38.1828 |

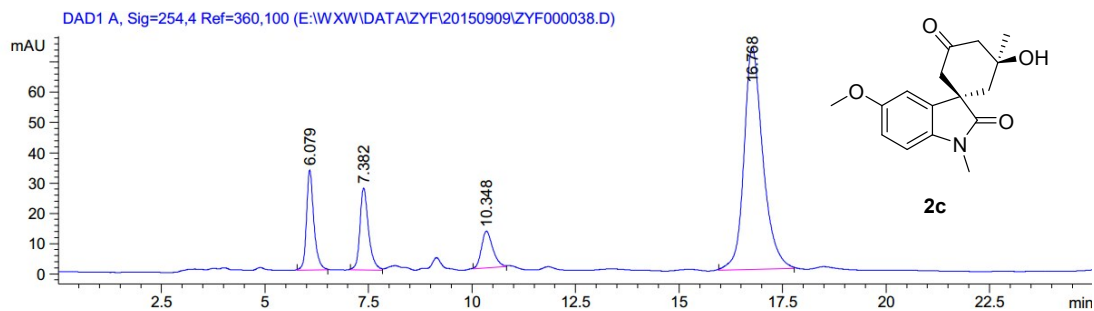

| Peak # | RetTime [min] | Type | Width [min] | Area [mAU*s] | Height [mAU] | Area %  |
|--------|---------------|------|-------------|--------------|--------------|---------|
| 1      | 6.079         | BB   | 0.1848      | 410.39178    | 33.06650     | 12.1403 |
| 2      | 7.382         | BB   | 0.2166      | 392.30612    | 27.14191     | 11.6053 |
| 3      | 10.348        | BB   | 0.2881      | 231.64247    | 12.16704     | 6.8525  |
| 4      | 16.768        | BB   | 0.4807      | 2346.05615   | 73.44314     | 69.4018 |

### 3-hydroxy-1',3,5',7'-tetramethylspiro[cyclohexane-1,3'-indoline]-2',5-dione (2d)

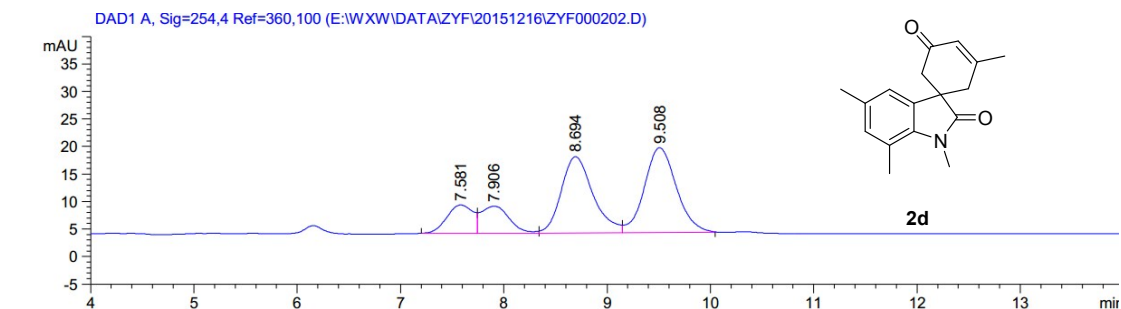

| Peak # | RetTime [min] | Type | Width [min] | Area [mAU*s] | Height [mAU] | Area %  |
|--------|---------------|------|-------------|--------------|--------------|---------|
| 1      | 7.581         | BV   | 0.2723      | 91.04388     | 5.14811      | 13.2392 |
| 2      | 7.906         | VB   | 0.2841      | 92.92494     | 4.92458      | 13.5127 |
| 3      | 8.694         | MM R | 0.3203      | 248.44904    | 12.92640     | 36.1283 |
| 4      | 9.508         | MM R | 0.3099      | 255.26665    | 13.72624     | 37.1197 |

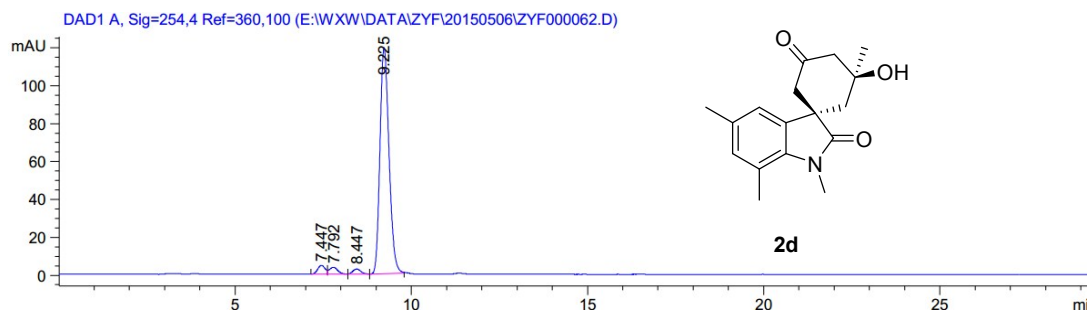

| Peak # | RetTime [min] | Type | Width [min] | Area [mAU*s] | Height [mAU] | Area %  |
|--------|---------------|------|-------------|--------------|--------------|---------|
| 1      | 7.447         | BV   | 0.2295      | 69.22902     | 4.65602      | 3.0301  |
| 2      | 7.792         | VB   | 0.2469      | 59.12953     | 3.65111      | 2.5880  |
| 3      | 8.447         | BV   | 0.2470      | 41.70429     | 2.65889      | 1.8253  |
| 4      | 9.225         | VB   | 0.2751      | 2114.68530   | 119.10801    | 92.5566 |

### 3-hydroxy-1',3,7'-trimethylspiro[cyclohexane-1,3'-indoline]-2',5-dione (2e)

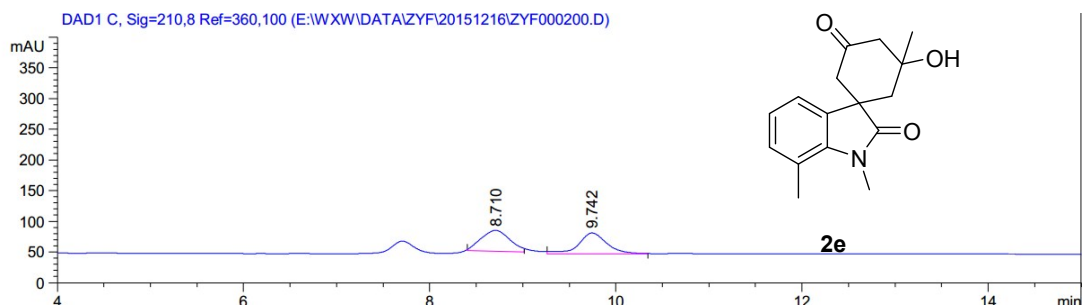

| Peak # | RetTime [min] | Type | Width [min] | Area [mAU*s] | Height [mAU] | Area %  |
|--------|---------------|------|-------------|--------------|--------------|---------|
| 1      | 8.710         | MM R | 0.3557      | 721.89343    | 33.82203     | 50.5678 |
| 2      | 9.742         | VB   | 0.3121      | 705.68286    | 33.73236     | 49.4322 |

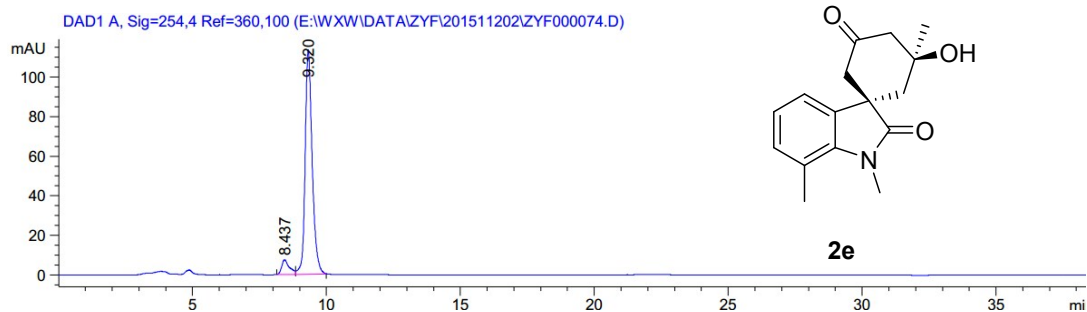

Signal 1: DAD1 A, Sig=254,4 Ref=360,100

| Peak # | RetTime [min] | Type | Width [min] | Area [mAU*s] | Height [mAU] | Area %  |
|--------|---------------|------|-------------|--------------|--------------|---------|
| 1      | 8.437         | BV   | 0.2859      | 150.69177    | 7.51488      | 6.7816  |
| 2      | 9.320         | VB   | 0.2752      | 2071.37817   | 113.33819    | 93.2184 |
